# Supplementary material for: Highly chemoselective and fast practical visible photoreduction of nitroaromatic compounds to aromatic amines and amides using a self-assembled triad TiO2-TEOA-NC (LMCT/EDA) complex system
Source: Royal Society of Chemistry journal article supplement (doi:10.1039/d3gc02563b), 2023-12-08
Supplement: d3gc02563b1.pdf [file d3gc02563b1.pdf]

## Supporting Information

### Highly chemoselective and fast practical visible photoreduction of nitroaromatic compounds to aromatic amines and amides using a self-assembled triad TiO<sub>2</sub>-TEOA-NC (LMCT/EDA) complex system

Mahshid Bagheri Natanzi<sup>a</sup>, Foad Kazemi<sup>\*a,b</sup>, Zahra Zand<sup>a</sup> and Babak Kaboudin<sup>a</sup>

#### Affiliation

a. Department of Chemistry, Institute for Advanced Studies in Basic Sciences (IASBS), Gava Zang, 49195-1159, Zanjan, Iran.

b. Center for Climate and Global Warming (CCGW), Institute for Advanced Studies in Basic Sciences (IASBS), Gava Zang, 45137-66731, Zanjan, Iran.

#### Table of Contents

|                                                                                                                       |     |
|-----------------------------------------------------------------------------------------------------------------------|-----|
| 1. Materials and Apparatuses .....                                                                                    | S2  |
| 2. Synthesis of chemically absorbed TiO <sub>2</sub> -TEOA complex .....                                              | S2  |
| 3. General procedure for the photoreduction of nitro compounds .....                                                  | S2  |
| 4. Scale-up test for the photoreduction of nitro compounds .....                                                      | S3  |
| 5. General procedure for one-pot synthesis of amides from nitro compounds .....                                       | S3  |
| 6. Testing with iodine solution .....                                                                                 | S4  |
| 7. Optimization of TiO <sub>2</sub> -P25 and TEOA amounts .....                                                       | S5  |
| 8. The photograph of the solutions containing photocatalyst before and after the light irradiation....                | S6  |
| 9. TG/DTG analysis of TiO <sub>2</sub> -TEOA .....                                                                    | S7  |
| 10. TG/DTG analysis of recycled TiO <sub>2</sub> -TEOA .....                                                          | S7  |
| 11. Photographs related to the amount of dispersion of TiO <sub>2</sub> -P25 and TiO <sub>2</sub> -TEOA powders ..... | S8  |
| 12. The photograph of testing with iodine solution .....                                                              | S9  |
| 13. Column specifications .....                                                                                       | S10 |

|                                                                                              |         |
|----------------------------------------------------------------------------------------------|---------|
| 14. Table of GC column specifications and GC results of a number of products .....           | S11-S17 |
| 15. Photocurrent measurements for TiO <sub>2</sub> -P25 at different light wavelengths ..... | S18     |
| 16. NMR data of the amine and amide products .....                                           | S19-S28 |
| 17. References .....                                                                         | S28     |
| 18. <sup>1</sup> H NMR and <sup>13</sup> C NMR spectra .....                                 | S29-S98 |

## 1. Materials and Apparatuses

TiO<sub>2</sub> (Degussa P25) was provided from Degussa Corporation. All reagents were used without further purification. Triethanolamine (TEOA, C<sub>6</sub>H<sub>15</sub>NO<sub>3</sub>), *tert*-Butanol anhydrous (*t*-BuOH, (CH<sub>3</sub>)<sub>3</sub>COH), Triethyl orthoformate (HC(OC<sub>2</sub>H<sub>5</sub>)<sub>3</sub>), Acetic anhydride (Ac<sub>2</sub>O, (CH<sub>3</sub>CO)<sub>2</sub>O), Benzoic anhydride ((C<sub>6</sub>H<sub>5</sub>CO)<sub>2</sub>O), Nitro compounds (NC), Sodium bicarbonate (NaHCO<sub>3</sub>), Sodium chloride (NaCl), Chloroform (CHCl<sub>3</sub>), *n*-Hexane (C<sub>6</sub>H<sub>14</sub>), Ethyl acetate (EtOAc, C<sub>4</sub>H<sub>8</sub>O<sub>2</sub>), were purchased from Sigma-Aldrich and Merck Company.

FTIR was measured using a Perkin Elmer spectrometer with KBr pellets. N<sub>2</sub> adsorption–desorption isotherms were measured using BELSORP max apparatus (77 K). Before investigating the surface areas of the materials, samples were degassed firstly at 200°C. UV-Visible diffusive reflectance spectra (DRS) were monitored by using a Cary 100 UV-Vis spectrophotometer with a diffuse reflectance accessory, samples were mixed in BaSO<sub>4</sub> (1:20 sample BaSO<sub>4</sub>) and pressed into a tablet, a BaSO<sub>4</sub> tablet made under the same conditions was used as a reference. The photoluminescence (PL) spectra were obtained at 25°C with a fluorospectrophotometer (Varian) using a Xe lamp as an excitation source. Photocatalytic reduction reaction was also carried out under violet LED irradiation (LED Epistar, 50 W, 20- 30 LM 700 mA h light bulb). Thermogravimetric analysis (TGA) was done using a Diamond TG/DTA (Perkin Elmer, USA) instrument. The Dynamic Light Scattering (DLS) technique for particle size measurement was carried out using a Malvern instrument (ZEN3600).

## 2. Synthesis of chemically absorbed TiO<sub>2</sub>-TEOA complex

The chemically absorbed TiO<sub>2</sub>-TEOA surface complex was synthesized using visible light irradiation. 50 mg of TiO<sub>2</sub>-P25 was suspended in 10 mL of deionized water. To the above suspension, required amount (2 ml) of triethanolamine (TEOA) was added drop by drop under continuous stirring. The resulting suspension was irradiated under stirring by a violet LED (400 nm, 1×50 w) as a light source for 3h at room temperature. The LED was placed about 1 cm from the down middle of the flask. Then after 20 minutes, the color of the reaction mixture was changed from white to a turquoise blue, which indicating the formation of TiO<sub>2</sub>-TEOA

surface complex. Finally, the product was collected by centrifugation and washed several times with deionized water to remove residual organic moiety and dried at 70 °C for 24 h.

### **3. General procedure for the photoreduction of nitro compounds**

TiO<sub>2</sub>-P25 (10 mg), triethanolamine (7.5 mmol), H<sub>2</sub>O (3 ml) and t-BuOH (0.3 ml) was transferred into a round-bottom Pyrex flask (5 mL). Then nitro compounds (1 mmol) were added to this solution and was sonicated for 10-15 min. The flask was irradiated under stirring by a violet LED (50 w) according to the data in Table 1. To avoid the photo-heating effect, during the reaction, a cooling fan was used to cool down the reaction flask to assure that the reaction was done at room temperature. After the completion of the reaction according to GC monitoring, the organic material was extracted with CHCl<sub>3</sub> (3×15 mL). The organic layer was washed with 5% NaHCO<sub>3</sub> aqueous solution (3×15 mL) and saturated NaCl solution (3×15 mL), dried with anhydrous sodium sulfate, filtered and the remaining organic phase after concentration in vacuum was analyzed using thin-layered chromatography (TLC) and pure products were extracted by plate chromatography using n-hexane/EtOAc as an eluent (n-Hexane, EtOAc 5:1). Assignments of the products were done by <sup>1</sup>H NMR and <sup>13</sup>C NMR spectroscopy.

### **4. Scale-up test for the photoreduction of nitro compounds**

TiO<sub>2</sub>-P25 (10 mg), triethanolamine (7.5 mmol), H<sub>2</sub>O (3 ml) and t-BuOH (0.3 ml) was transferred into a round-bottom Pyrex flask (5 mL). Then nitro compounds (1 mmol) were added to this solution and was sonicated for 10 min. The flask was irradiated under stirring by a violet LED (50 w) and after the completion of the reaction according to GC monitoring, another 1 mmol of the nitro compound was added to the same flask and after 10 minutes sonicate was irradiated with the same LED lamp. After the completion of the reaction, the third mmol with 0.5 ml (3.79 mmol) of TEOA was added, and after sonicate was irradiated with the same LED. This method continued until 5 mmol of the substrate and after the completion of the reaction according to GC monitoring, the organic material was extracted with CHCl<sub>3</sub> (3×15 mL). The organic layer was washed with 5% NaHCO<sub>3</sub> aqueous solution (3×15 mL) and saturated NaCl solution (3×15 mL), dried with anhydrous sodium sulfate, filtered and the remaining organic phase after concentration in vacuum was analyzed using thin-layered chromatography (TLC) and pure products were extracted by plate chromatography using n-hexane/EtOAc as an eluent (n-Hexane, EtOAc 5:1). Assignments of the products were done by <sup>1</sup>H NMR and <sup>13</sup>C NMR spectroscopy.

### **5. General procedure for one-pot synthesis of amides from nitro compounds**

TiO<sub>2</sub>-P25 (10 mg), triethanolamine (6 mmol), H<sub>2</sub>O (3 ml) and t-BuOH (0.3 ml) was transferred into a round-bottom Pyrex flask (5 mL) then nitro compounds (1 mmol) and triethyl orthoformate (1.2 mmol) for formylation or anhydride (acetic anhydride or benzoic anhydride) (1.2 mmol) were added to this solution and

was sonicated for 15 min. The flask was irradiated under stirring by a violet LED (50 w) according to the data in Table 5. After the completion of the reaction according to GC monitoring, the organic material was extracted with  $\text{CHCl}_3$  ( $3 \times 15$  mL). The organic layer was washed with 5%  $\text{NaHCO}_3$  aqueous solution ( $3 \times 15$  mL) and saturated  $\text{NaCl}$  solution ( $3 \times 15$  mL), dried with anhydrous sodium sulfate, filtered and the remaining organic phase after concentration in vacuum was analyzed using thin-layered chromatography (TLC) and pure products were extracted by plate chromatography using n-hexane/EtOAc as an eluent (n-Hexane, EtOAc 4:1). Assignments of the products were done by  $^1\text{H}$  NMR and  $^{13}\text{C}$  NMR spectroscopy

## 6. Testing with iodine solution

Iodine solution was used as an indicator to identify  $\text{H}_2$  to check for the possibility of  $\text{H}_2$  release during the reaction (if  $\text{H}_2$  is present in the solution,  $\text{HI}$  is produced, which changes the colour of the iodine solution). The contents of the reaction flask were transferred to a round-bottomed Pyrex flask, which was then connected to a balloon containing iodine solution in ethanol (at a concentration of 5%) with a tube tied to a needle at the other end. No colour change was observed at the start of the reaction and at the time of LED irradiation, but it was observed that 10 minutes after the start of the reaction, the iodine solution flowed out of the tube into the reaction balloon (Fig. S6). This observation indicated that in the presence of triethanolamine during the reaction, oxygen is absorbed by the solution, causing the iodine solution to rise towards the reaction vessel. The results of this experiment which are proof of the consumption of dissolved oxygen by the triethanolamine were completely consistent with the previous results obtained in this research as well as other recent research.<sup>1</sup> Also, according to the lack of colour change of the iodine solution and the absence of bubbles during the reaction, it can be concluded that  $\text{H}_2$  is not produced during the process.

## 7. Optimization of TiO<sub>2</sub>-P25 and TEOA amounts

**Table S1:** The optimization of TiO<sub>2</sub>-P25 and TEOA amounts in water solvent and violet LED irradiation <sup>a</sup>

| Entry | reductant (mmol) | TiO <sub>2</sub> -P25 (mg) | Time (h) | Yield <sup>b</sup> (%) |
|-------|------------------|----------------------------|----------|------------------------|
| 1     | TEOA             | 7                          | 1.5      | 100                    |
| 2     | TEOA             | 10                         | 0.75     | 100                    |
| 3     | TEOA             | 15                         | 1        | 98                     |
| 4     | TEOA             | 20                         | 3.5      | 98                     |
| 5     | TEOA             | 30                         | 3        | 95                     |
| 6     | TEOA             | 40                         | 1        | 90                     |
| 7     | TEOA             | 10                         | 3        | 100 <sup>c</sup>       |
| 8     | TEOA             | 10                         | 8        | 100 <sup>d</sup>       |

<sup>a</sup> Nitrobenzene (1 mmol), TiO<sub>2</sub>-P25 (10 mg), TEOA (7.5 mmol), H<sub>2</sub>O (3 ml), *t*-BuOH (0.3 ml), Air atmosphere conditions, LED 50 w ( $\lambda$  =400 nm) and room temperature.

<sup>b</sup> Isolated yield.

<sup>c</sup> TEOA: 5 mmol

<sup>d</sup> TEOA: 3 mmol

## 8. The photograph of the solutions containing photocatalyst before and after the light irradiation

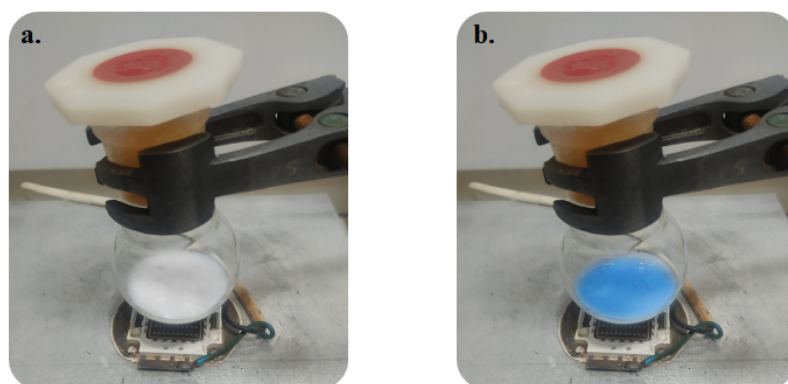

**Fig S1** The photograph of the solutions containing photocatalyst before and after the light irradiation: a) A water solution containing  $\text{TiO}_2$ -P25 and TEOA before light irradiation. b) A water solution containing  $\text{TiO}_2$ -P25 and TEOA after the light irradiation for 0.5 h with purple LED. Conditions:  $\text{TiO}_2$ -P25 (15 mg), TEOA (7.5 mmol) and  $\text{H}_2\text{O}$  (3 ml). A purple LED lamp (50 w) was used as the light source. As shown in these photographs, the color of the  $\text{TiO}_2$  solution changed from white to blue after the formation of the  $\text{TiO}_2$ -TEOA (in situ) under light irradiation.

## 9. TG/DTG analysis of TiO<sub>2</sub>-TEOA

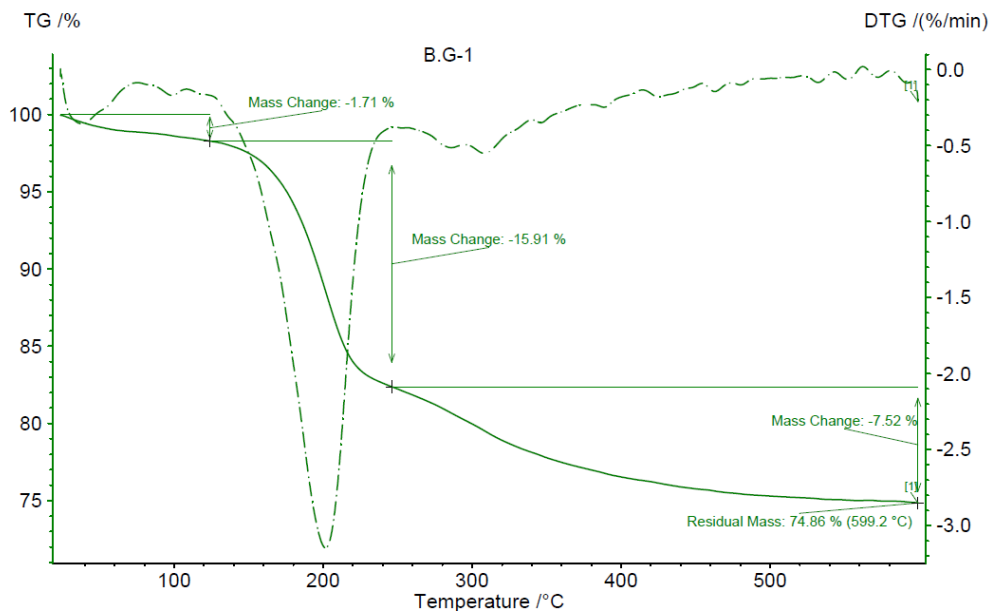

Fig S2. TG/DTG analysis of TiO<sub>2</sub>-TEOA

## 10. TG/DTG analysis of recycled TiO<sub>2</sub>-TEOA

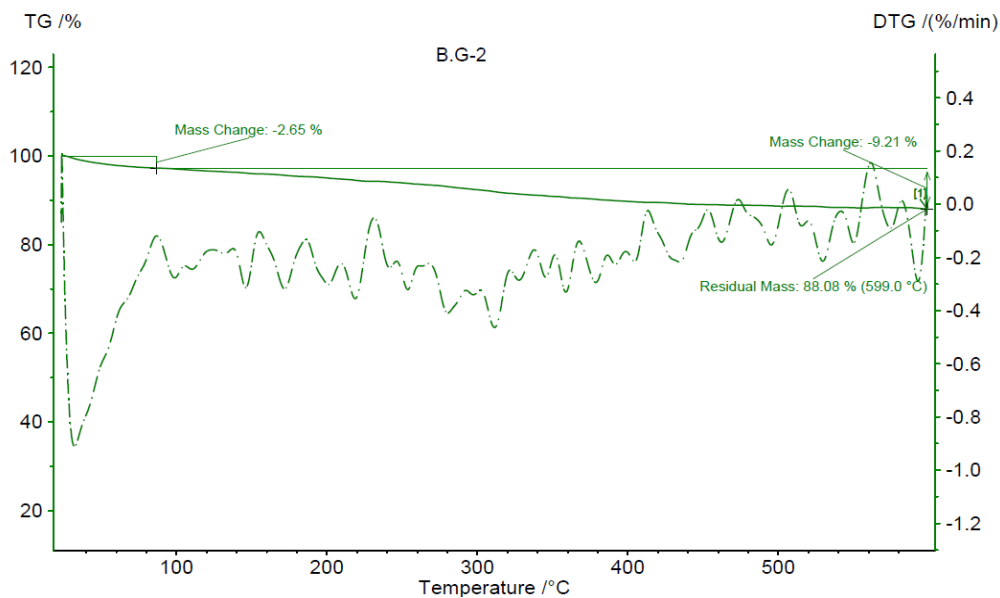

Fig S3. TG/DTG analysis of recycled TiO<sub>2</sub>-TEOA obtained from the nitrobenzene reduction in the presence of triethylamine (without triethanolamine as the reducing agent)

## 11. Photographs related to the amount of dispersion of $\text{TiO}_2$ -P25 and $\text{TiO}_2$ -TEOA powders

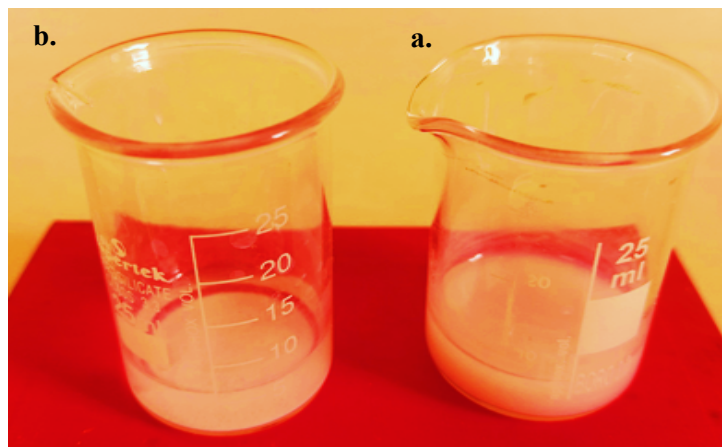

**Fig S4.** Image of aqueous solutions (immediately, after 5 minutes of dispersion in an ultrasonic device) (a)  $\text{TiO}_2$ - P25, (b)  $\text{TiO}_2$ -TEOA

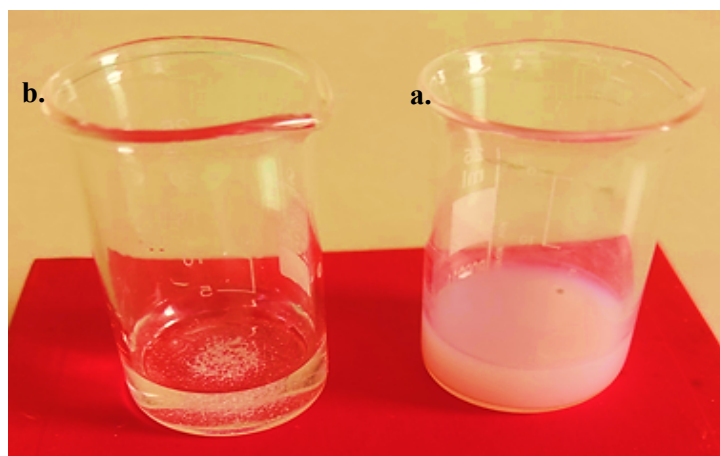

**Fig S5.** Image of aqueous solutions (after 10 minutes of stillness) (a)  $\text{TiO}_2$ - P25, (b)  $\text{TiO}_2$ -TEOA



## 12. The photograph of testing with iodine solution

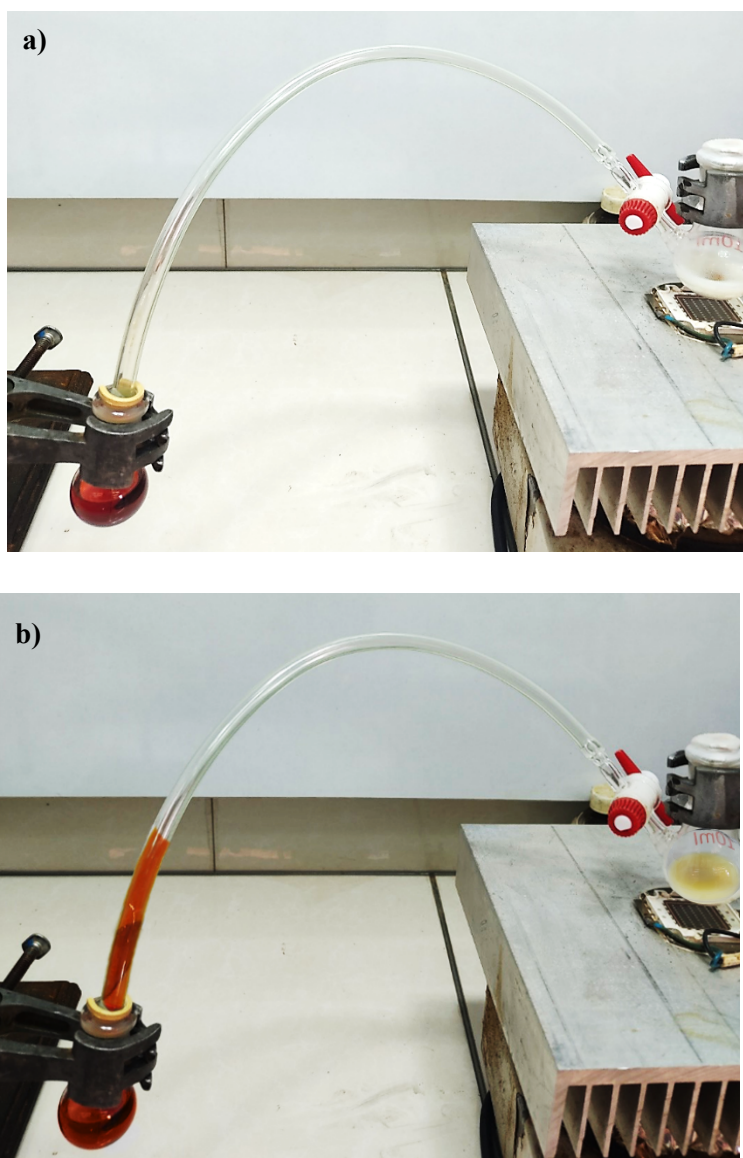

**Fig S6.** Testing with iodine solution. **a)** Before the start of the reaction, **b)** After 10 minutes from the start of the reaction, the reaction solution has absorbed oxygen from the air, so that the iodine solution then flows into the reaction vessel.

## 13. Column specifications

| Test conditions                                                                                                                                                                                                        | Parameter            |
|------------------------------------------------------------------------------------------------------------------------------------------------------------------------------------------------------------------------|----------------------|
| CP-Sil 8 CB (25 m × 0.32 mm × 1.2 um<br>(Column Flow = 2 and Split Ratio = 1/20)<br>Condition:<br>Temperature: 180° C<br>Rate: 10 Hz<br>Flow: 10 psi<br>Injector: 1041, T (°C) : 230 °C<br>Carrier gas: N <sub>2</sub> | Non-alcoholic column |
| Rtx-BAC2 (30 m × 0.53 mm × 2 um<br>Condition:<br>Temperature: 180° C<br>Rate:10 psi<br>Flow: 10 psi<br>Injector: 1079, T (°C) : 230 °C<br>Carrier gas: N <sub>2</sub>                                                  | Alcoholic column     |
| 220° C – Flame Ionization detector (FID)                                                                                                                                                                               | Detector temperature |

### 14. GC results of a number of products

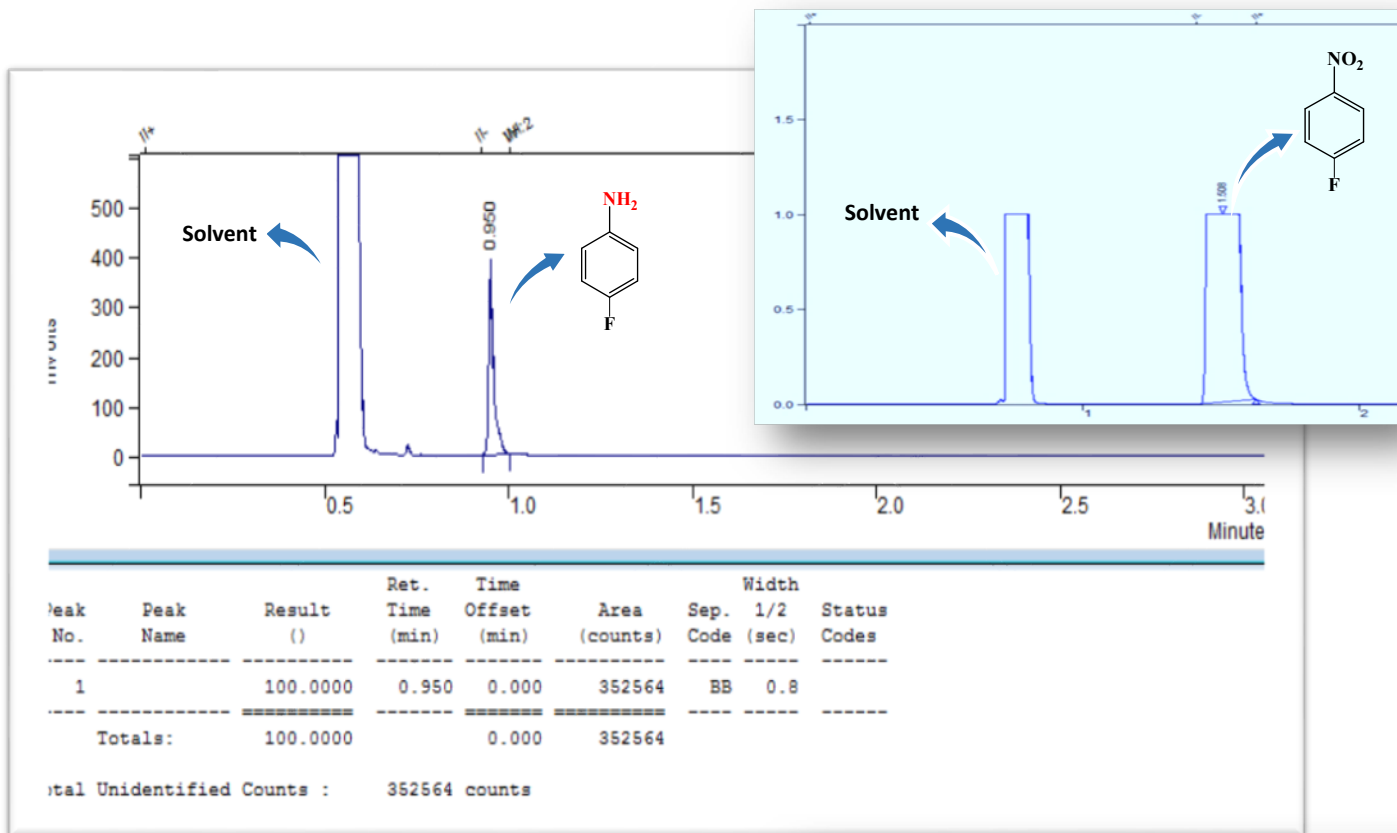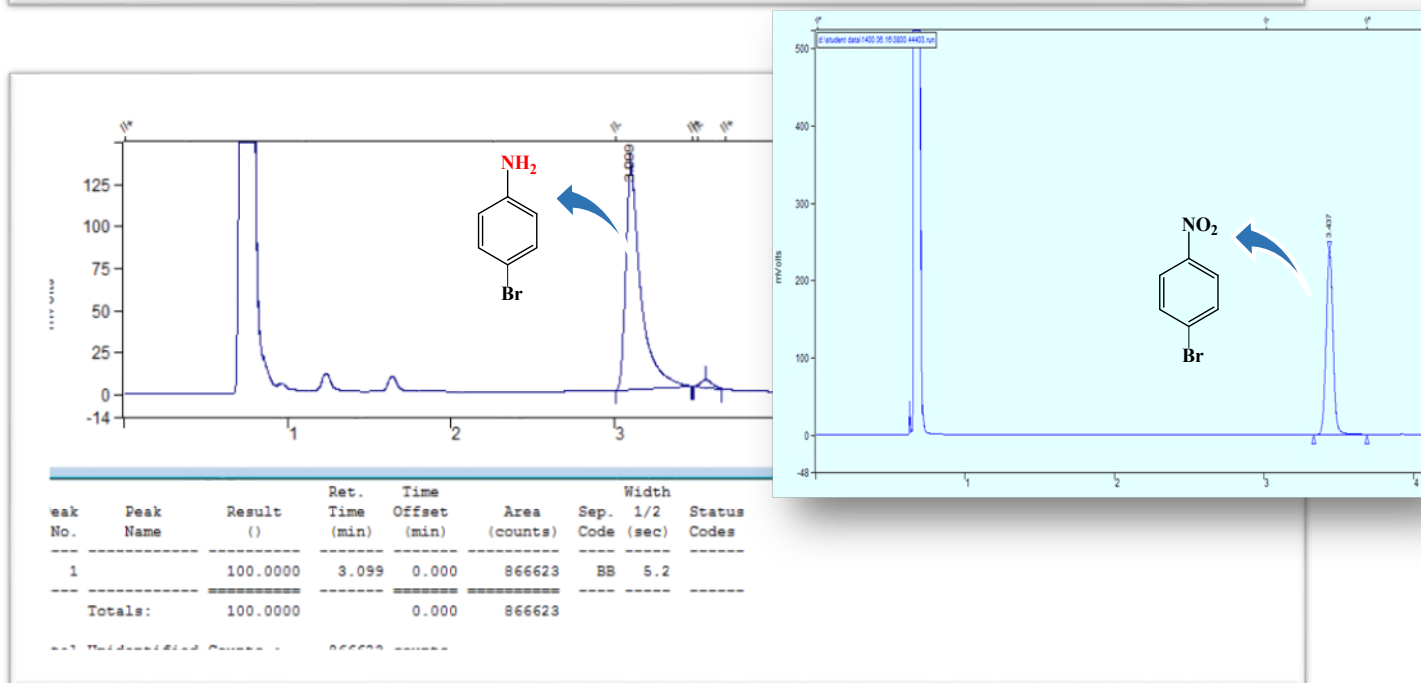

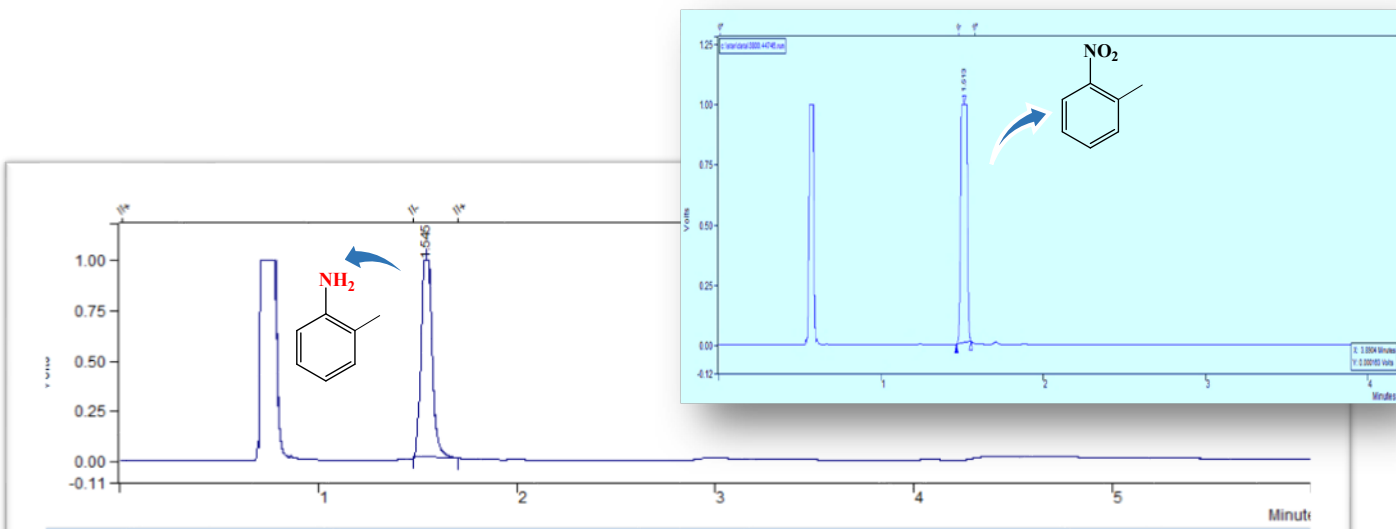

| Peak No. | Peak Name | Result (%) | Ret. Time (min) | Time Offset (min) | Area (counts) | Sep. Code | 1/2 (sec) | Status Codes |
|----------|-----------|------------|-----------------|-------------------|---------------|-----------|-----------|--------------|
| 1        |           | 100.0000   | 1.545           | 0.000             | 3859589       | BB        | 3.5       |              |
| Totals:  |           | 100.0000   |                 | 0.000             | 3859589       |           |           |              |

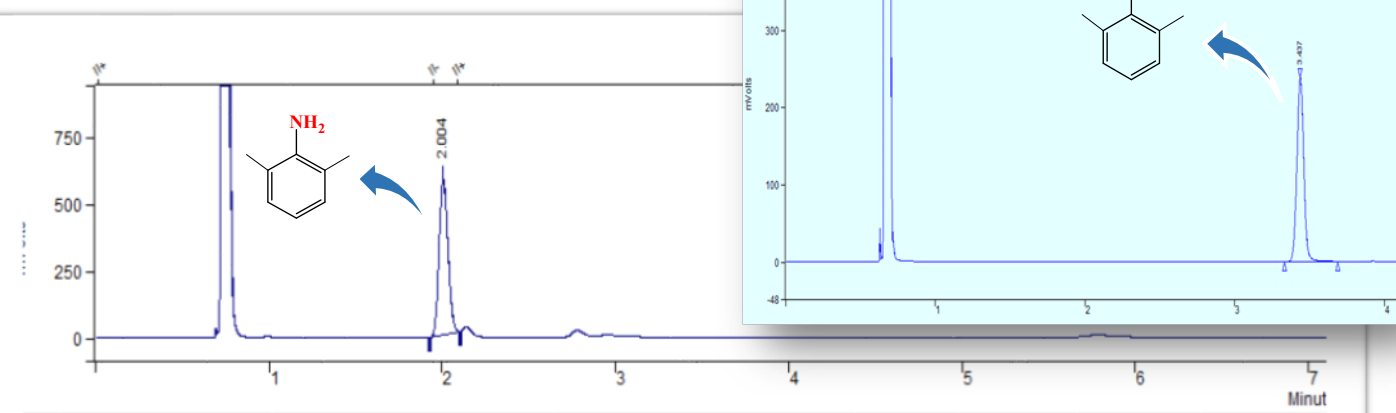

| Peak No. | Peak Name | Result (%) | Ret. Time (min) | Time Offset (min) | Area (counts) | Sep. Code | 1/2 (sec) | Status Codes |
|----------|-----------|------------|-----------------|-------------------|---------------|-----------|-----------|--------------|
| 1        |           | 100.0000   | 2.004           | 0.000             | 2086416       | BB        | 3.3       | U            |
| Totals:  |           | 100.0000   |                 | 0.000             | 2086416       |           |           |              |

Status Codes:  
 - User-defined peak endpoint(s)  
 . . . . .

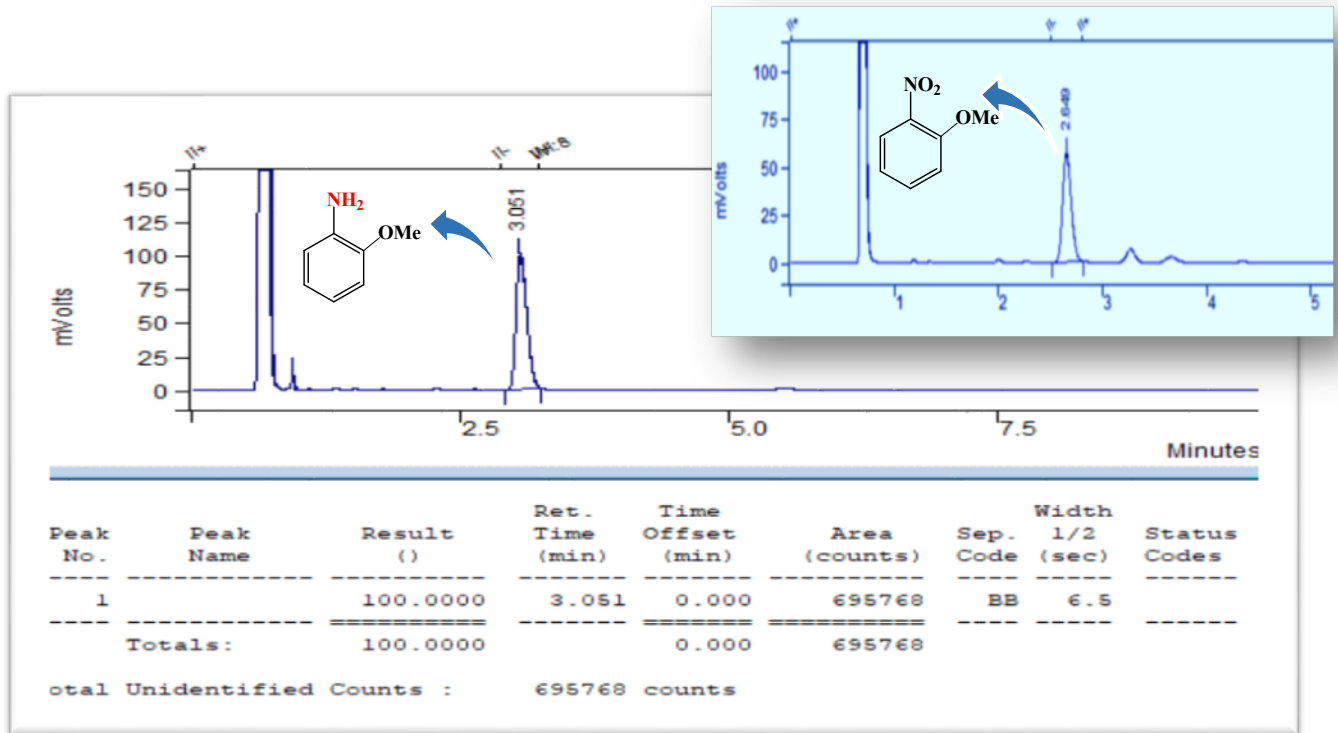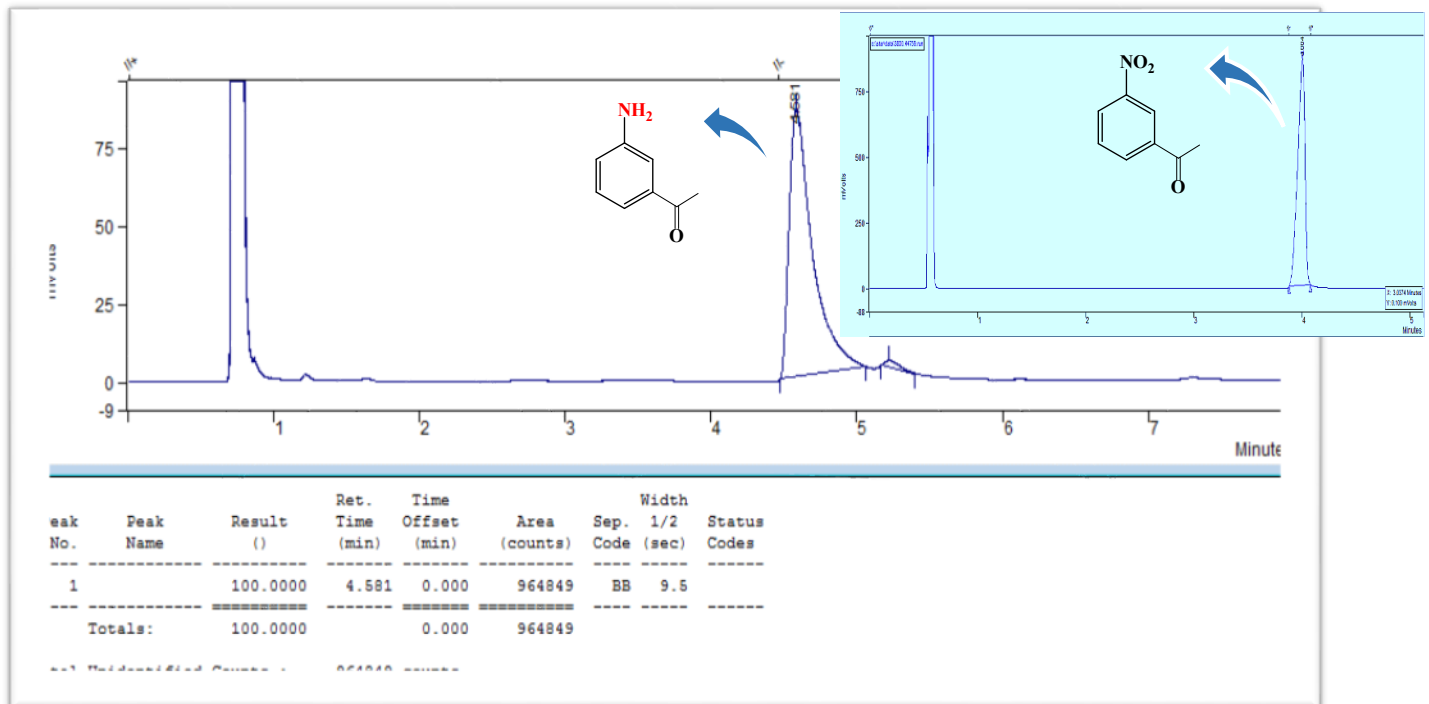

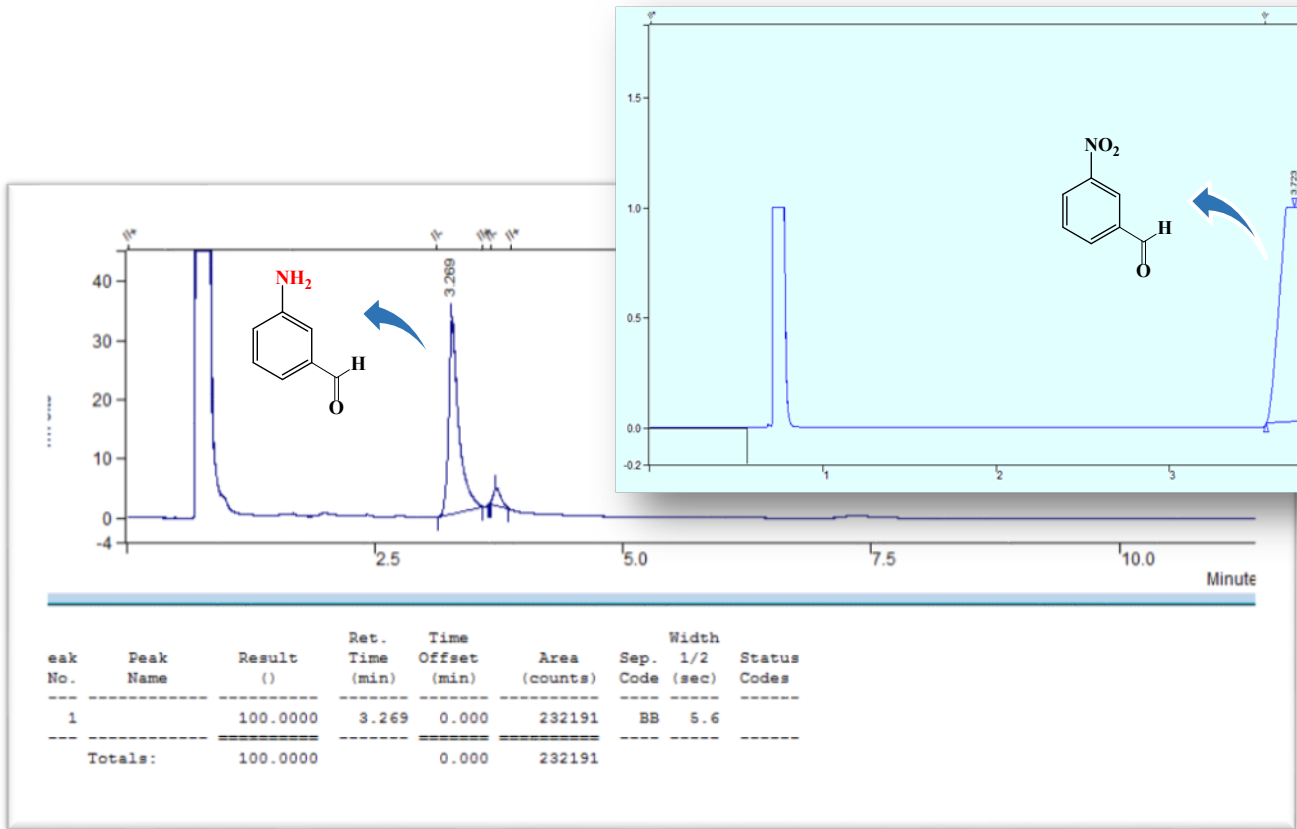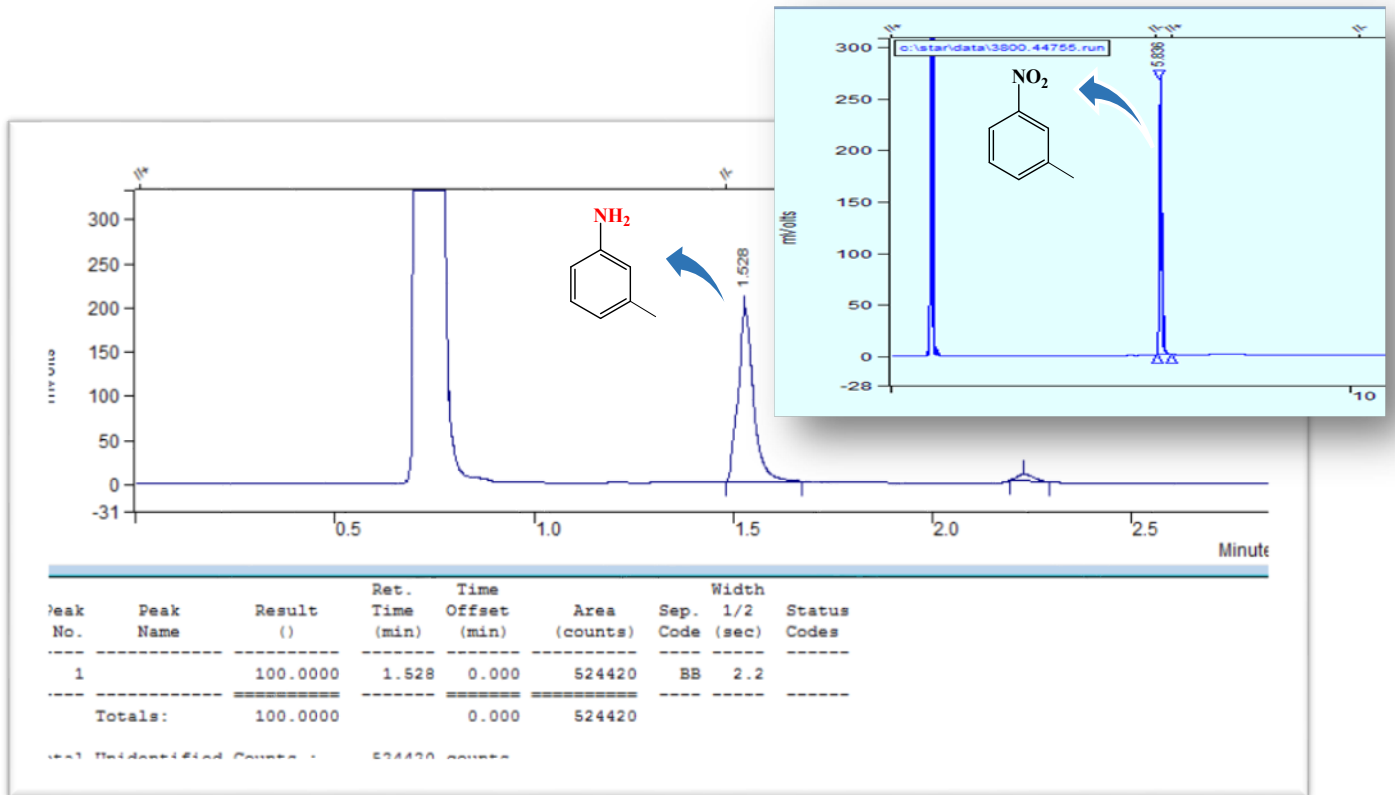

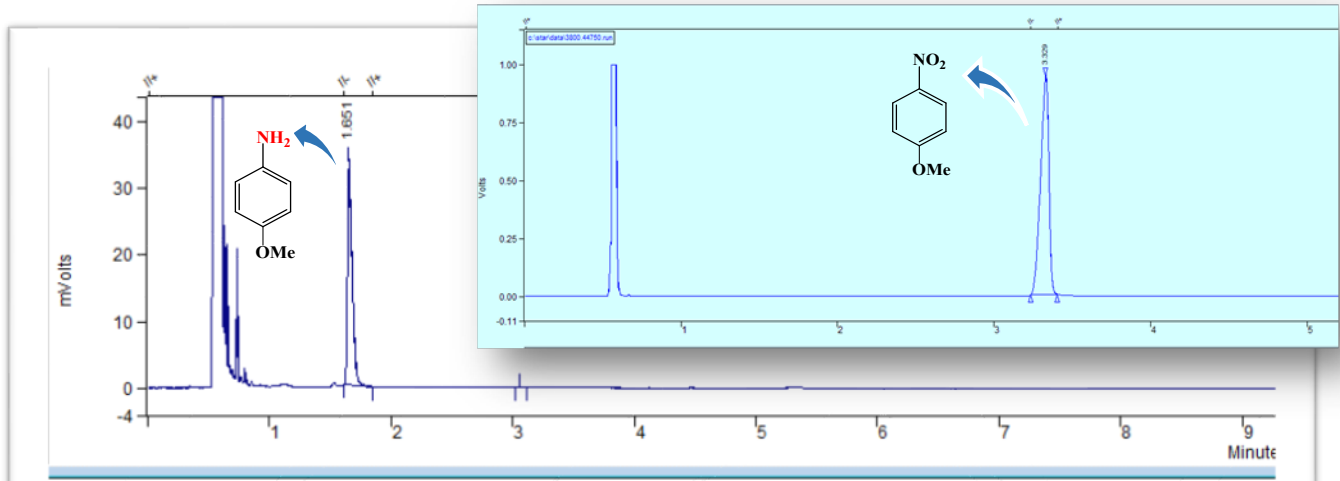

| Peak No. | Peak Name | Result (%) | Ret. Time (min) | Time Offset (min) | Area (counts) | Sep. Code | Width 1/2 (sec) | Status Codes |
|----------|-----------|------------|-----------------|-------------------|---------------|-----------|-----------------|--------------|
| 1        |           | 100.0000   | 1.651           | 0.000             | 86934         | BB        | 2.3             |              |
| Totals:  |           | 100.0000   |                 | 0.000             | 86934         |           |                 |              |

Total Unidentified Counts : 86934 counts

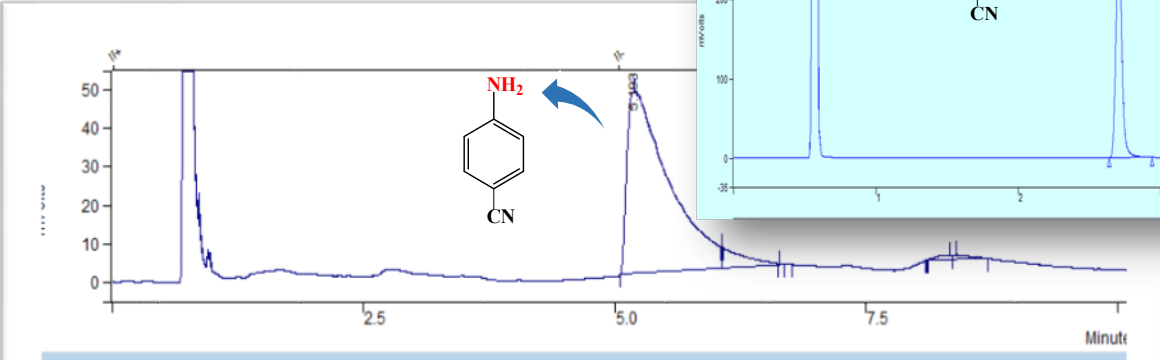

| Peak No. | Peak Name | Result (%) | Ret. Time (min) | Time Offset (min) | Area (counts) | Sep. Code | Width 1/2 (sec) | Status Codes |
|----------|-----------|------------|-----------------|-------------------|---------------|-----------|-----------------|--------------|
| 1        |           | 94.0500    | 5.193           | 0.000             | 1373536       | BV        | 26.0            | U            |
| 2        |           | 5.9500     | 6.062           | 0.000             | 86896         | VB        | 0.0             | U            |
| Totals:  |           | 100.0000   |                 | 0.000             | 1460432       |           |                 |              |

Status Codes:  
- User-defined peak endpoint(s)

Total Unidentified Counts : 1460432 counts

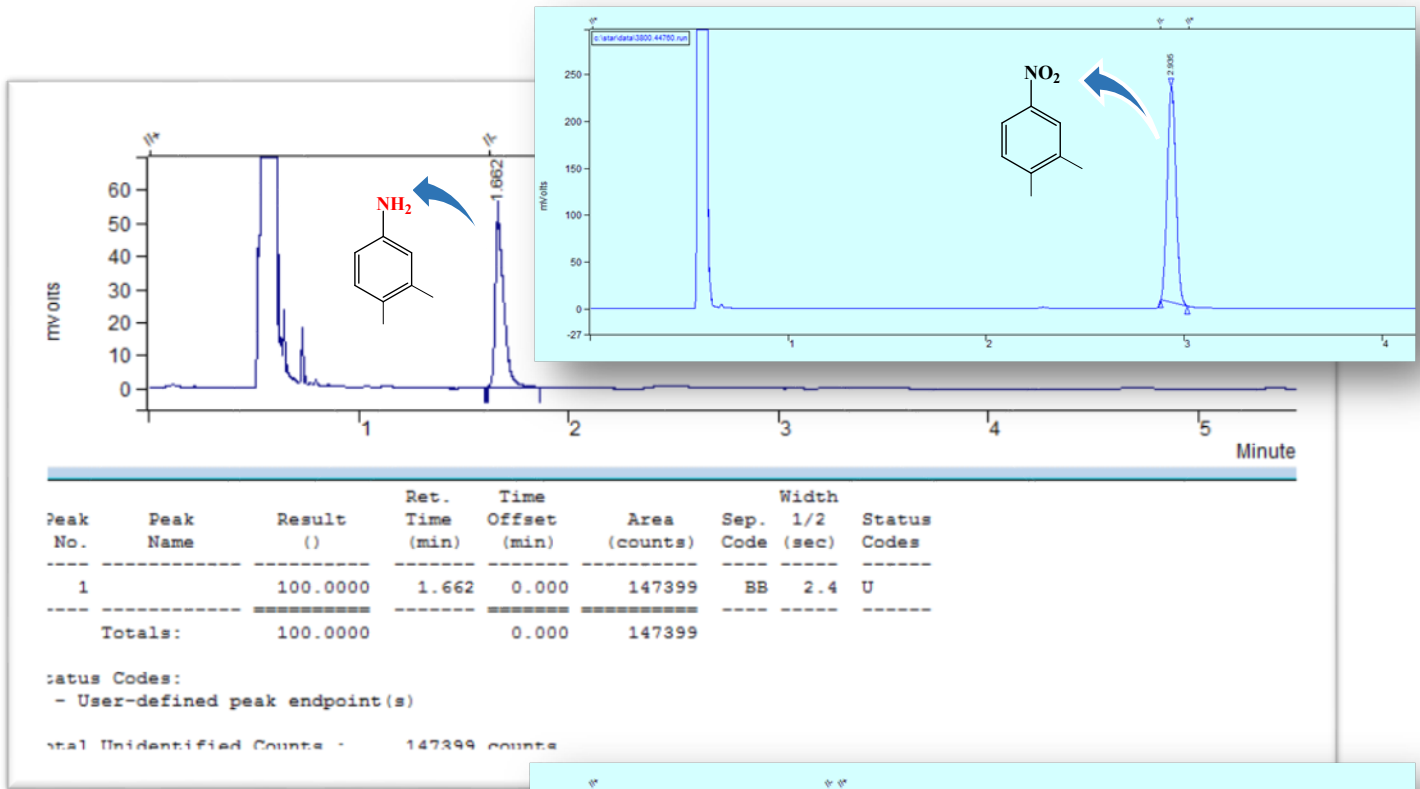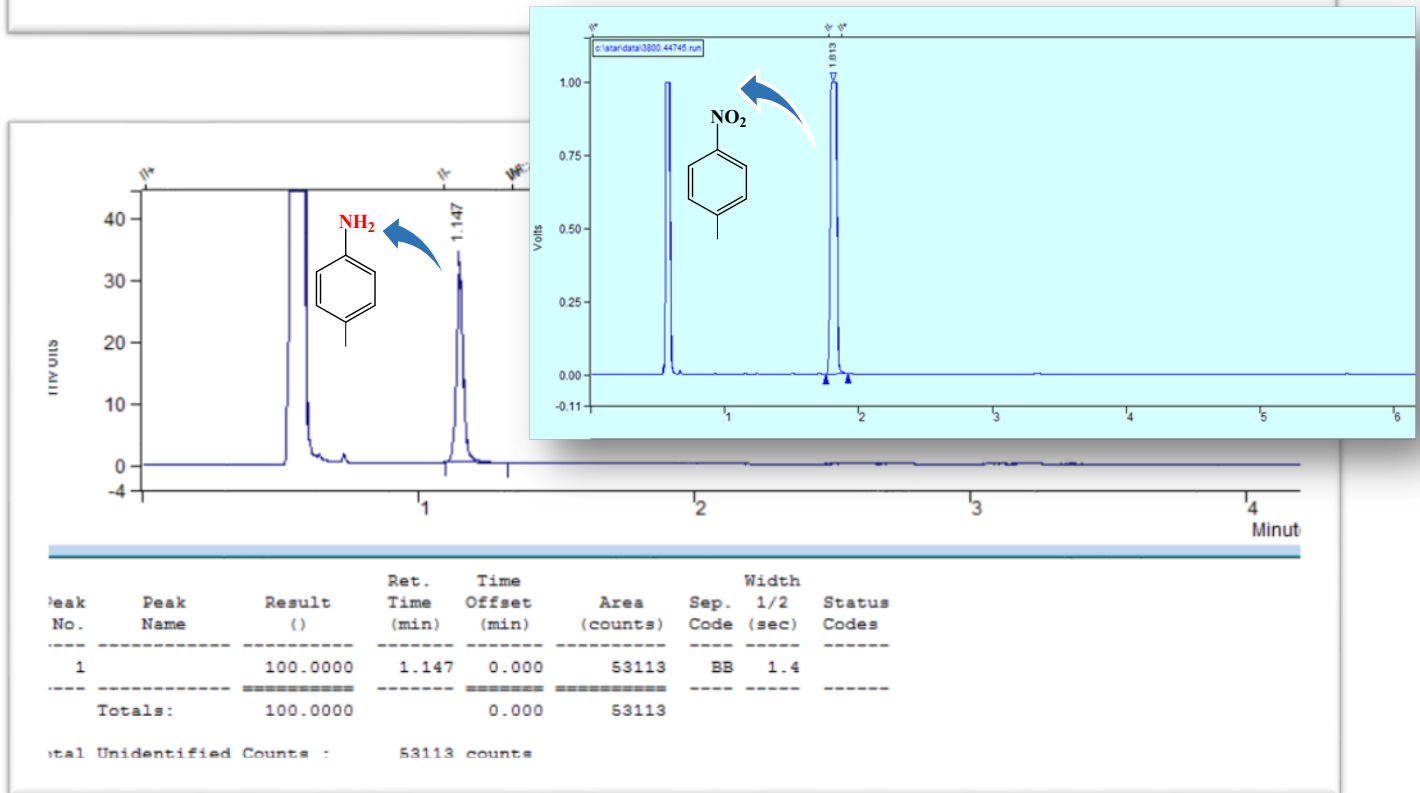



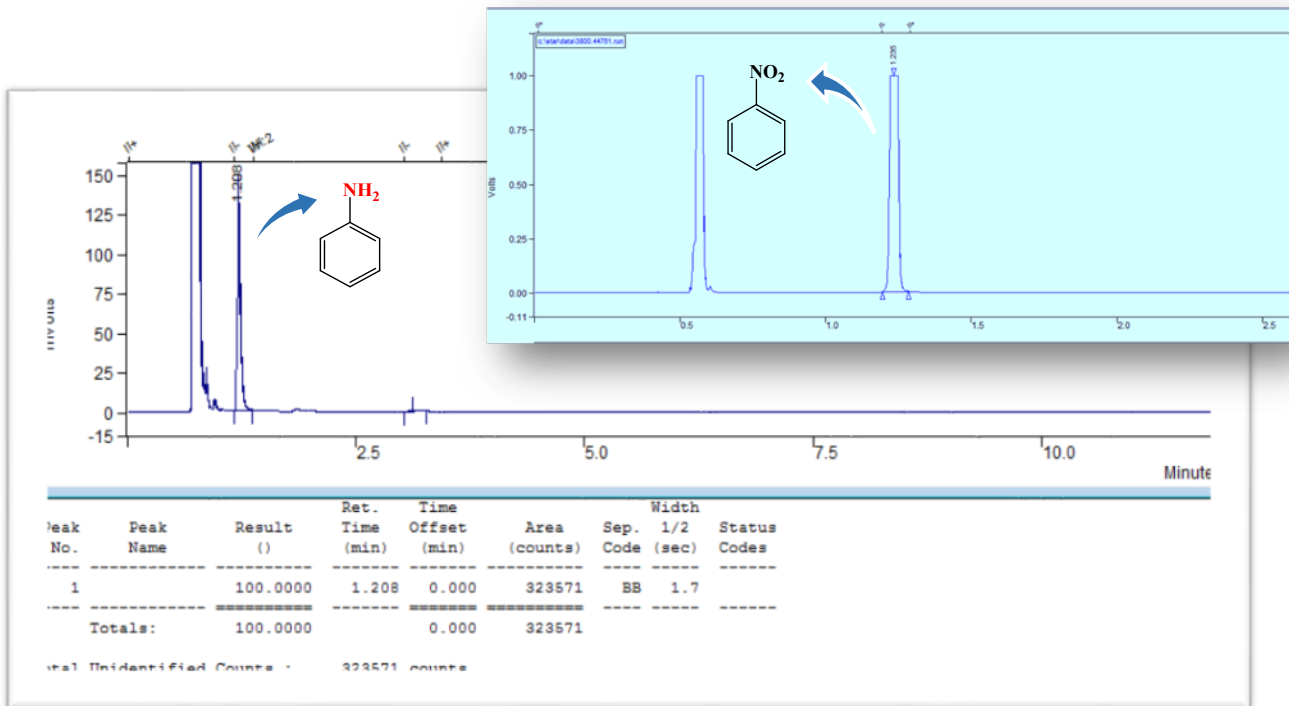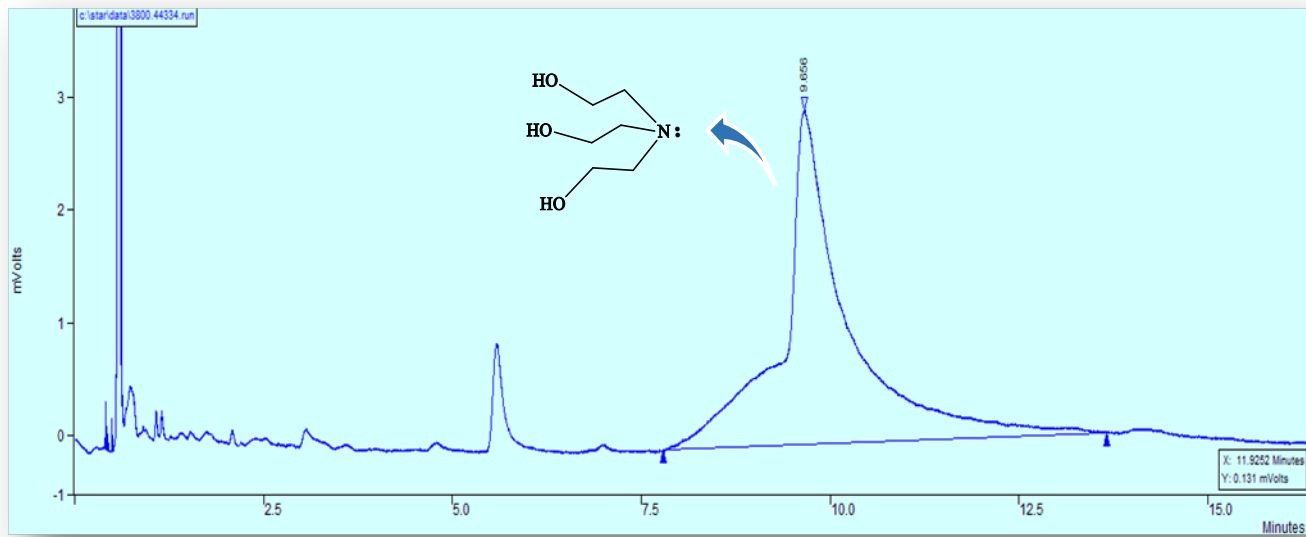

### 15. Photocurrent measurements for TiO<sub>2</sub>-P25 at different light wavelengths

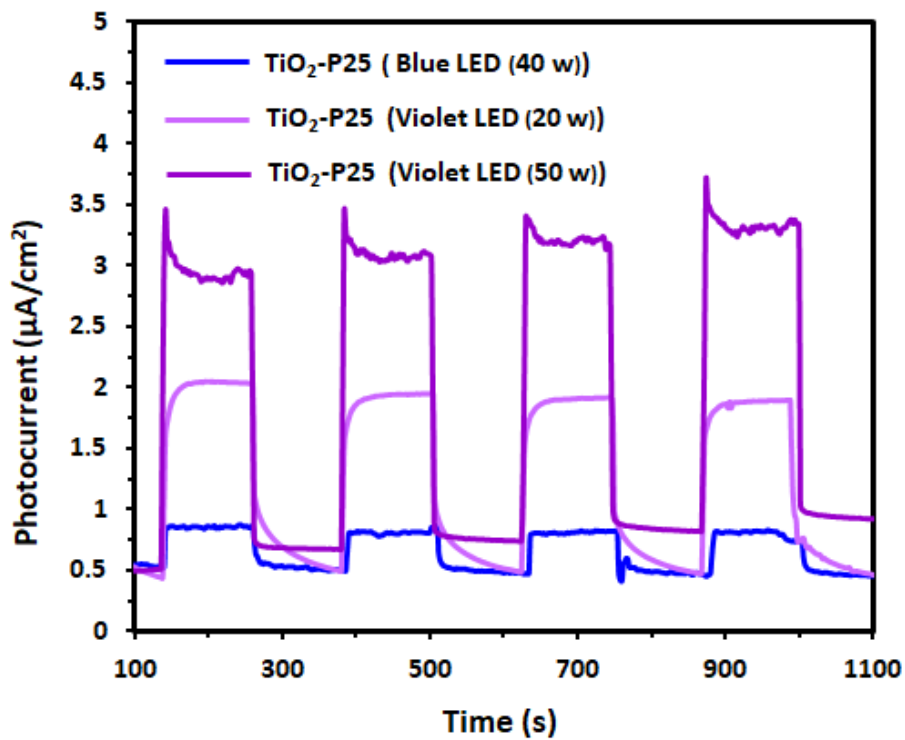

Fig S7. Photocurrent measurements for TiO<sub>2</sub>-P25 under blue LED (460 nm, 40 w), violet LED (400 nm, 20 w) and violet LED (400 nm, 50 w) irradiation

## 16. NMR data of the amine and amide products

### Aniline <sup>2</sup>

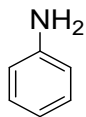

Light yellow liquid, <sup>1</sup>H NMR (400 MHz, CDCl<sub>3</sub>) δ (ppm) 7.43 (t, *J* = 7.8 Hz, 2H), 7.04 (t, *J* = 7.3 Hz, 1H), 6.85 (d, *J* = 8.4 Hz, 2H), 3.78 (s, br, 2H). <sup>13</sup>C NMR (101 MHz, CDCl<sub>3</sub>) δ (ppm) 147.02, 129.63, 118.63, 115.43.

### 4-Bromoaniline <sup>3</sup>

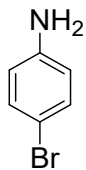

White powder, <sup>1</sup>H NMR (400 MHz, DMSO-*d*<sub>6</sub>) δ (ppm) 7.15 (d, *J* = 8.4 Hz, 2H), 6.55 (d, *J* = 8.4 Hz, 2H), 5.27 (s, 2H). <sup>13</sup>C NMR (101 MHz, DMSO-*d*<sub>6</sub>) δ (ppm) 148.52, 131.82, 116.27, 106.58.

### 4-Fluoroaniline <sup>4</sup>

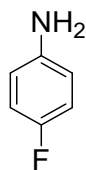

Light-colored oily liquid, <sup>1</sup>H NMR (400 MHz, DMSO-*d*<sub>6</sub>) δ (ppm) 6.85 (t, *J* = 8.9 Hz, 2H), 6.55 (dd, *J* = 8.8, 4.7 Hz, 2H), 4.94 (s, 2H). <sup>13</sup>C NMR (101 MHz, DMSO-*d*<sub>6</sub>) δ (ppm) 155.81, 153.5, 145.65, 115.66, 115.44, 115.01.

### 4-Chloroaniline <sup>4</sup>

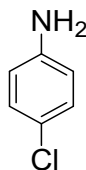

Beige crystals, <sup>1</sup>H NMR (400 MHz, DMSO-*d*<sub>6</sub>) δ (ppm) 7.02 (d, *J* = 8.7 Hz, 2H), 6.56 (d, *J* = 8.7 Hz, 2H), 5.26 (s, br, 2H). <sup>13</sup>C NMR (101 MHz, DMSO-*d*<sub>6</sub>) δ (ppm) 148.25, 128.97, 119.20, 115.63.

#### 4-Aminobenzonitrile <sup>5</sup>

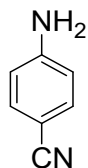

Off-white crystalline powder, <sup>1</sup>H NMR (400 MHz, CDCl<sub>3</sub>) δ (ppm) 7.36 (d, *J* = 8.4 Hz, 2H), 6.64 (d, *J* = 8.6 Hz, 2H), 4.44 (s, 2H). <sup>13</sup>C NMR (101 MHz, CDCl<sub>3</sub>) δ (ppm) 151.10, 133.76, 120.64, 114.44, 99.15.

#### *p*-Toluidine <sup>6</sup>

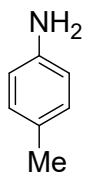

Beige crystals, <sup>1</sup>H NMR (400 MHz, DMSO-*d*<sub>6</sub>) δ (ppm) 6.83 (d, *J* = 8.9 Hz, 2H), 6.48 (d, *J* = 7.9 Hz, 2H), 4.79 (s, br, 2H), 2.13 (s, 3H). <sup>13</sup>C NMR (101 MHz, DMSO-*d*<sub>6</sub>) δ (ppm) 146.54, 129.69, 124.35, 114.48, 20.60.

#### *m*-Toluidine <sup>7</sup>

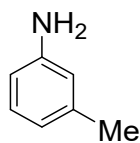

Yellow to brown liquid, <sup>1</sup>H NMR (400 MHz, DMSO-*d*<sub>6</sub>) δ 6.94 (t, *J* = 7.6 Hz, 1H), 6.47 – 6.40 (m, 2H), 6.38 (d, *J* = 7.4 Hz, 1H), 4.93 (s, 2H), 2.20 (s, 3H). <sup>13</sup>C NMR (101 MHz, DMSO-*d*<sub>6</sub>) δ (ppm) 148.96, 138.25, 129.19, 117.19, 115.15, 111.75, 21.70.

#### *o*-Toluidine <sup>6</sup>

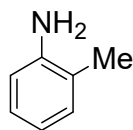

Yellow liquid, <sup>1</sup>H NMR (400 MHz, CDCl<sub>3</sub>) δ (ppm) 7.32 – 7.24 (m, 3H), 6.76 (d, *J* = 8.0 Hz, 1H), 3.64 (s, br, 2H), 2.27 (s, 3H). <sup>13</sup>C NMR (101 MHz, CDCl<sub>3</sub>) δ (ppm) 148.55, 129.24, 126.67, 123.53, 119.13, 114.01, 17.09.

### ***o*-Anisidine** <sup>8</sup>

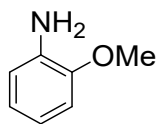

Yellow liquid, <sup>1</sup>H NMR (400 MHz, DMSO-d<sub>6</sub>) δ (ppm) 6.80 (d, *J* = 7.9 Hz, 1H), 6.75 – 6.59 (m, 2H), 6.55 (t, *J* = 7.4 Hz, 1H), 4.67 (s, 2H), 3.77 (s, 3H). <sup>13</sup>C NMR (101 MHz, DMSO-d<sub>6</sub>) δ (ppm) 146.84, 138.05, 121.32, 116.67, 114.30, 111.01, 55.64.

### ***p*-Anisidine** <sup>9</sup>

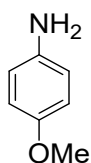

Gray crystals, <sup>1</sup>H NMR (400 MHz, DMSO-d<sub>6</sub>) δ (ppm) 6.66 (d, *J* = 7.5 Hz, 2H), 6.53 (d, *J* = 7.6 Hz, 2H), 4.60 (s, br, 2H), 3.64 (s, 3H). <sup>13</sup>C NMR (101 MHz, DMSO-d<sub>6</sub>) δ (ppm) 151.06, 142.71, 115.42, 114.97, 55.75.

### **2-Aminophenol** <sup>9</sup>

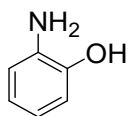

White gray powder, <sup>1</sup>H NMR (400 MHz, DMSO-d<sub>6</sub>) δ (ppm) 8.98 (s, br, 1H), 6.67 (dd, *J* = 7.7, 1.2 Hz, 1H), 6.62 – 6.54 (m, *J* = 8.9, 7.7, 1.5 Hz, 2H), 6.42 (td, *J* = 7.5, 1.8 Hz, 1H), 4.49 (s, br, 2H). <sup>13</sup>C NMR (101 MHz, DMSO-d<sub>6</sub>) δ (ppm) 144.46, 136.99, 120.00, 116.93, 114.92, 114.84.

### **3-Aminophenol** <sup>4</sup>

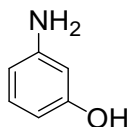

White powder, <sup>1</sup>H NMR (400 MHz, DMSO-d<sub>6</sub>) δ (ppm) 8.89 (s, 1H), 6.81 (t, *J* = 7.8 Hz, 1H), 6.20 – 5.86 (m, 3H), 4.90 (s, 2H). <sup>13</sup>C NMR (101 MHz, DMSO-d<sub>6</sub>) δ (ppm) 158.53, 150.27, 129.98, 105.95, 103.84, 101.45.

#### 4-Aminophenol <sup>4</sup>

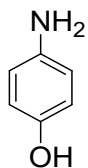

Light brown powder, <sup>1</sup>H NMR (400 MHz, DMSO-d<sub>6</sub>) δ (ppm) 8.36 (s, 1H), 6.41-6.49 (m, *J* = 25.1, 8.5 Hz, 4H), 4.39 (s, 2H). <sup>13</sup>C NMR (101 MHz, DMSO-d<sub>6</sub>) δ (ppm) 148.66, 141.15, 115.99, 115.68.

#### 2-Aminobenzyl alcohol <sup>4</sup>

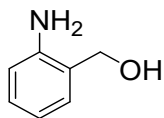

White powder, <sup>1</sup>H NMR (400 MHz, DMSO-d<sub>6</sub>) δ (ppm) 7.07 (d, *J* = 7.3 Hz, 1H), 6.98 (t, *J* = 7.6 Hz, 1H), 6.64 (d, *J* = 7.9 Hz, 1H), 6.54 (t, *J* = 7.3 Hz, 1H), 5.00 (t, *J* = 5.4 Hz, 1H), 4.91 (s, 2H), 4.40 (d, *J* = 5.3 Hz, 2H). <sup>13</sup>C NMR (101 MHz, DMSO-d<sub>6</sub>) δ (ppm) 146.82, 128.17, 128.11, 125.83, 116.27, 115.01, 61.65.

#### 3-Aminobenzyl alcohol <sup>10</sup>

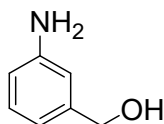

White powder, <sup>1</sup>H NMR (400 MHz, DMSO-d<sub>6</sub>) δ (ppm) 6.96 (t, *J* = 7.6 Hz, 1H), 6.56 (s, 1H), 6.52 – 6.38 (m, 2H), 5.06 – 4.91 (m, 3H), 4.36 (d, *J* = 5.1 Hz, 2H). <sup>13</sup>C NMR (101 MHz, DMSO-d<sub>6</sub>) δ (ppm) 148.91, 143.60, 128.94, 114.49, 112.81, 112.57, 63.70.

#### 4-Aminobenzyl alcohol <sup>6</sup>

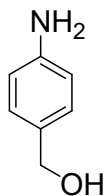

Light yellow crystal, <sup>1</sup>H NMR (400 MHz, DMSO-d<sub>6</sub>) δ (ppm) 7.01 (d, *J* = 8.2 Hz, 2H), 6.56 (d, *J* = 8.3 Hz, 2H), 4.94 (s, br, 3H), 4.33 (s, 2H). <sup>13</sup>C NMR (101 MHz, DMSO-d<sub>6</sub>) δ (ppm) 147.89, 130.12, 128.47, 114.13, 63.65.

### 1-Amino-naphthalene <sup>9</sup>

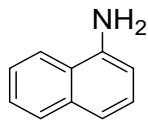

Light purple solid, <sup>1</sup>H NMR (400 MHz, DMSO-d<sub>6</sub>) δ (ppm) 8.08 (d, *J* = 8.2 Hz, 1H), 7.74 (m, 1H), 7.44 – 7.34 (m, 2H), 7.22 (t, *J* = 7.8 Hz, 1H), 7.09 (d, *J* = 8.1 Hz, 1H), 6.70 (dd, *J* = 7.4, 0.7 Hz, 1H), 5.73 (s, 2H). <sup>13</sup>C NMR (101 MHz, DMSO-d<sub>6</sub>) δ (ppm) 145.19, 134.67, 128.29, 127.22, 125.96, 124.09, 123.16, 122.82, 115.82, 107.88.

### 4-Nitroaniline <sup>6</sup>

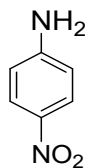

Yellow solid, <sup>1</sup>H NMR (400 MHz, DMSO-d<sub>6</sub>) δ (ppm) 7.96 (d, *J* = 9.2 Hz, 2H), 6.75 (s, 2H), 6.62 (d, *J* = 9.2 Hz, 2H). <sup>13</sup>C NMR (101 MHz, DMSO-d<sub>6</sub>) δ (ppm) 156.18, 136.09, 126.88, 112.84.

### 3-Aminoacetophenone <sup>11</sup>

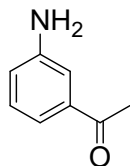

Yellow to light brown crystalline, <sup>1</sup>H NMR (400 MHz, DMSO-d<sub>6</sub>) δ (ppm) 7.20 – 7.10 (m, 3H), 6.82 (d, *J* = 7.3 Hz, 1H), 5.35 (s, 2H), 2.50 (s, 3H). <sup>13</sup>C NMR (101 MHz, DMSO-d<sub>6</sub>) δ (ppm) 198.71, 149.47, 138.13, 129.52, 118.95, 116.41, 113.18, 27.16.

### 4-Aminoacetophenone <sup>7</sup>

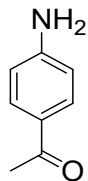

Light yellow to brown powder,  $^1\text{H}$  NMR (400 MHz,  $\text{DMSO-d}_6$ )  $\delta$  (ppm) 7.69 (d,  $J = 8.4$  Hz, 2H), 6.59 (d,  $J = 8.5$  Hz, 2H), 6.06 (s, 2H), 2.40 (s, 3H).  $^{13}\text{C}$  NMR (101 MHz,  $\text{DMSO-d}_6$ )  $\delta$  (ppm) 195.44, 154.10, 131.06, 125.33, 112.95, 26.32.

### 3-Aminobenzaldehyde <sup>12</sup>

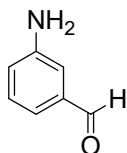

Pale yellow solid,  $^1\text{H}$  NMR (400 MHz,  $\text{DMSO-d}_6$ )  $\delta$  (ppm) 9.29 (s, 1H), 7.21 (t,  $J = 7.8$  Hz, 1H), 6.44 (d,  $J = 7.0$  Hz, 2H), 6.38 (dd,  $J = 7.1, 1.4$  Hz, 1H), 5.30 (s, 2H).  $^{13}\text{C}$  NMR (101 MHz,  $\text{DMSO-d}_6$ )  $\delta$  (ppm) 196.65, 149.64, 132.13, 129.69, 118.79, 117.45, 115.24.

### 4-amino-*N,N*-diethylbenzamide <sup>13</sup>

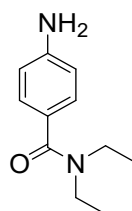

Colorless solid,  $^1\text{H}$  NMR (400 MHz,  $\text{DMSO-d}_6$ )  $\delta$  (ppm) 7.07 (d,  $J = 8.4$  Hz, 2H), 6.55 (d,  $J = 8.5$  Hz, 2H), 5.43 (s, 2H), 3.32 (t,  $J = 14.3, 7.3$  Hz, 4H), 1.10 (t,  $J = 7.0$  Hz, 6H).  $^{13}\text{C}$  NMR (101 MHz,  $\text{DMSO-d}_6$ )  $\delta$  (ppm) 171.16, 150.33, 128.54, 124.17, 113.24, 13.95.

### *N*-phenylacetamide <sup>14</sup>

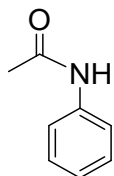

White crystal,  $^1\text{H}$  NMR (400 MHz,  $\text{CDCl}_3$ )  $\delta$  (ppm) 8.83 (s, br, 1H), 7.57 (dd,  $J = 8.5, 0.9$  Hz, 2H), 7.34 – 7.26 (m, 2H), 7.15 – 7.08 (m, 1H), 2.16 (s, 3H).  $^{13}\text{C}$  NMR (101 MHz,  $\text{CDCl}_3$ )  $\delta$  (ppm) 169.80, 138.15, 128.89, 124.40, 120.50, 24.22.

### *N*-(*p*-tolyl) acetamide <sup>14</sup>



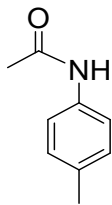

White crystal,  $^1\text{H}$  NMR (400 MHz,  $\text{CDCl}_3$ )  $\delta$  (ppm) 8.33 (s, br, 1H), 7.40 (d,  $J = 8.4$  Hz, 2H), 7.10 (d,  $J = 8.2$  Hz, 2H), 2.32 (s, 3H), 2.14 (s, 3H).  $^{13}\text{C}$  NMR (101 MHz,  $\text{CDCl}_3$ )  $\delta$  (ppm) 169.36, 135.46, 133.96, 129.38, 120.43, 24.18, 20.87.

### ***N*-(*p*-tolyl) formamide <sup>15</sup>**

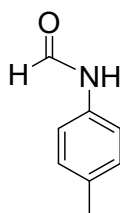

White crystal,  $^1\text{H}$  NMR (400 MHz,  $\text{CDCl}_3$ )  $\delta$  (ppm) 8.66 (d,  $J = 11.2$  Hz, 0.5H), 8.39 (s, 0.5H), 7.90 (s, br, 0.5H), 7.46 (d,  $J = 7.6$  Hz, 1H), 7.29 (s, 0.5H), 7.18 (t,  $J = 8.3$  Hz, 2H), 7.02 (d,  $J = 7.4$  Hz, 1H), 2.36 (d,  $J = 6.2$  Hz, 3H).  $^{13}\text{C}$  NMR (101 MHz,  $\text{CDCl}_3$ )  $\delta$  (ppm) 163.41, 159.21, 136.33, 135.82, 135.62, 135.02, 127.34, 127.15, 122.16, 119.79, 14.68, 14.62.

### ***N*-(4-methoxyphenyl) formamide <sup>16</sup>**

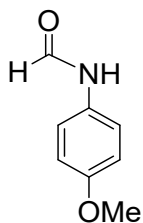

White crystal,  $^1\text{H}$  NMR (400 MHz,  $\text{CDCl}_3$ )  $\delta$  (ppm) 8.67 (s, 1H), 8.54 (d,  $J = 11.2$  Hz, 1H), 8.30 (s, 1H), 8.17 (d,  $J = 34.1$  Hz, 1H), 7.47 (d,  $J = 8.3$  Hz, 2H), 7.06 (d,  $J = 8.8$  Hz, 2H), 6.90-6.84 (dd,  $J = 16.9, 8.5$  Hz, 4H), 3.80 (d,  $J = 8.9$  Hz, 6H).  $^{13}\text{C}$  NMR (101 MHz,  $\text{CDCl}_3$ )  $\delta$  (ppm) 163.39, 159.34, 157.56, 156.63, 130.18, 129.73, 121.88, 121.51, 114.88, 114.18, 55.56, 55.48.

### ***N*-(3-methoxyphenyl) formamide <sup>17</sup>**

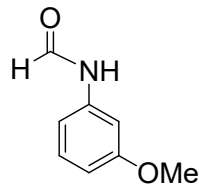

Brown oil,  $^1\text{H}$  NMR (400 MHz,  $\text{CDCl}_3$ )  $\delta$  (ppm) 8.92 (s, 1H), 8.72 (d,  $J = 11.3$  Hz, 1H), 8.36 (d,  $J = 1.7$  Hz, 1H), 8.19 (s, 1H), 7.38 – 7.17 (m, 3H), 7.12 – 7.01 (d, 1H), 6.82 – 6.59 (m, 4H), 3.81 (d,  $J = 9.6$  Hz, 6H).  $^{13}\text{C}$  NMR (101 MHz,  $\text{CDCl}_3$ )  $\delta$  (ppm) 163.01, 160.67, 160.11, 159.60, 138.26, 138.09, 130.60, 129.80, 112.25, 110.89, 110.45, 106.02, 104.88, 55.40, 55.32.

***N*-(3-chlorophenyl) acetamide <sup>18</sup>**

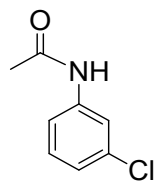

White crystal,  $^1\text{H}$  NMR (400 MHz,  $\text{CDCl}_3$ )  $\delta$  (ppm) 9.25 (s, 1H), 7.71 (t,  $J = 2.0$  Hz, 1H), 7.36 (d,  $J = 8.2$ , 1.0 Hz, 1H), 7.18 (t,  $J = 8.1$  Hz, 1H), 7.10 – 7.02 (d, 1H), 2.19 (s, 3H).  $^{13}\text{C}$  NMR (101 MHz,  $\text{CDCl}_3$ )  $\delta$  (ppm) 170.32, 139.30, 134.34, 129.92, 124.38, 120.54, 118.47, 24.17.

***N*-(3-chloro-4-fluorophenyl) formamide <sup>16</sup>**

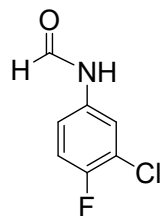

White crystal,  $^1\text{H}$  NMR (400 MHz,  $\text{CDCl}_3$ )  $\delta$  (ppm) 8.63 (d,  $J = 11.2$  Hz, 1H), 8.52 (s, 0.6H), 8.39 (s, 1.4H), 7.76 (dd,  $J = 6.5$ , 2.6 Hz, 1H), 7.64 (s, 1H), 7.39 (ddd,  $J = 8.8$ , 3.9, 2.7 Hz, 1.4H), 7.26 – 7.07 (m, 3H), 7.02 (ddd,  $J = 8.8$ , 3.8, 2.8 Hz, 0.6H).  $^{13}\text{C}$  NMR (101 MHz,  $\text{CDCl}_3$ )  $\delta$  (ppm) 162.61 (s), 159.05 (s), 157.14 (s), 156.31 (s), 154.68 (s), 153.85 (s), 133.40 (d,  $J = 3.1$  Hz), 122.31 (s), 121.46 (d,  $J = 8.8$  Hz), 121.23 (s), 119.67 (d,  $J = 7.1$  Hz), 118.99 (d,  $J = 6.8$  Hz), 117.60 (d,  $J = 22.7$  Hz), 116.80 (d,  $J = 22.0$  Hz).

***N*-(3-chloro-2-methylphenyl) formamide <sup>19</sup>**

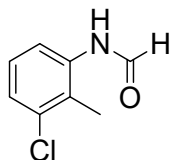

Pink crystals,  $^1\text{H}$  NMR (400 MHz,  $\text{CDCl}_3$ )  $\delta$  (ppm) 8.50 (dd,  $J = 21.6, 6.3$  Hz, 2H), 8.22 (s, 1H), 7.77 (d,  $J = 7.9$  Hz, 1H), 7.35 – 7.23 (m, 3H), 7.18 (td,  $J = 8.0, 5.4$  Hz, 2H), 7.09 (d,  $J = 7.7$  Hz, 1H), 2.38 (d,  $J = 15.0$  Hz, 6H).  $^{13}\text{C}$  NMR (101 MHz,  $\text{CDCl}_3$ )  $\delta$  (ppm) 163.41, 159.21, 136.33, 135.82, 135.62, 135.02, 128.65, 127.80, 127.34, 127.15, 127.10, 126.71, 122.16, 119.79, 14.68, 14.62.

***N*-(3, 4-dimethylphenyl) acetamide**<sup>20</sup>

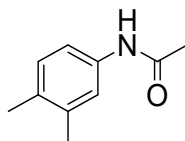

Crystal-Powder,  $^1\text{H}$  NMR (400 MHz,  $\text{CDCl}_3$ )  $\delta$  (ppm) 7.97 (s, 1H), 7.33 – 7.28 (m, 1H), 7.24 (dd,  $J = 8.1, 2.1$  Hz, 1H), 7.05 (d,  $J = 8.1$  Hz, 1H), 2.24-2.19 (m, 6H), 2.14 (s, 3H).  $^{13}\text{C}$  NMR (101 MHz,  $\text{CDCl}_3$ )  $\delta$  (ppm) 168.80, 137.09, 135.78, 132.58, 129.88, 121.56, 117.72, 24.39, 19.90, 19.21.

***N*-(3-Methylphenyl) acetamide**<sup>14</sup>

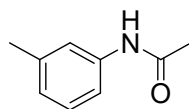

Light yellow solid,  $^1\text{H}$  NMR (400 MHz,  $\text{CDCl}_3$ )  $\delta$  (ppm) 8.26 (s, br, 1H), 7.39 (s, 1H), 7.36 – 7.28 (m, 1H), 7.18 (t,  $J = 7.8$  Hz, 1H), 6.92 (d,  $J = 7.5$  Hz, 1H), 2.31 (s, 3H), 2.15 (s, 3H).  $^{13}\text{C}$  NMR (101 MHz,  $\text{CDCl}_3$ )  $\delta$  (ppm) 169.10, 138.77, 138.06, 128.72, 125.07, 120.83, 117.26, 24.42, 21.48.

***N*-(3-acetylphenyl) acetamide**<sup>21</sup>

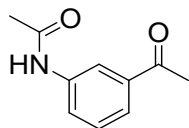

White solid,  $^1\text{H}$  NMR (400 MHz,  $\text{DMSO-d}_6$ )  $\delta$  (ppm) 10.21 (s, 1H), 8.17 (s, 1H), 7.86 (d,  $J = 8.0$  Hz, 1H), 7.66 (d,  $J = 7.7$  Hz, 1H), 7.46 (t,  $J = 7.9$  Hz, 1H), 2.57 (s, 3H), 2.08 (s, 3H).  $^{13}\text{C}$  NMR (101 MHz,  $\text{DMSO-d}_6$ )  $\delta$  (ppm) 198.18, 169.13, 140.15, 137.73, 129.60, 123.94, 123.58, 118.57, 27.21, 24.48.

***N*-(3, 4-dimethylphenyl) benzamide**<sup>22</sup>

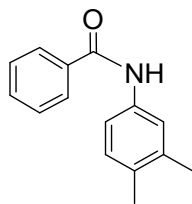

White solid,  $^1\text{H}$  NMR (300 MHz,  $\text{CDCl}_3$ )  $\delta$  (ppm) 10.07 (s, 1H), 7.96 – 7.89 (m, 2H), 7.61 – 7.63-7.41 (m, 5H), 7.08 (d,  $J = 8.1$  Hz, 1H), 2.21 (s, 3H), 2.18 (s, 3H).  $^{13}\text{C}$  NMR (75 MHz,  $\text{CDCl}_3$ )  $\delta$  (ppm) 165.25, 136.89, 136.06, 135.19, 131.37, 131.31, 129.43, 128.29, 127.54, 121.80, 118.09, 19.53, 18.72.

### ***N*-(4-hydroxyphenyl) acetamide**<sup>23</sup>

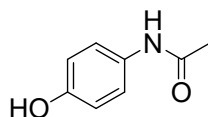

White crystalline powder,  $^1\text{H}$  NMR (400 MHz,  $\text{DMSO-d}_6$ )  $\delta$  (ppm) 9.66 (s, 1H), 9.15 (s, 1H), 7.36 (d,  $J = 7.5$  Hz, 2H), 6.70 (d,  $J = 7.5$  Hz, 2H), 2.00 (s, 3H).  $^{13}\text{C}$  NMR (ppm) (101 MHz,  $\text{DMSO-d}_6$ )  $\delta$  (ppm) 167.99, 153.60, 131.50, 121.30, 115.47, 24.20.

## **17. References**

- [1] A. Aguirre-Soto, K. Kaastrup, S. Kim, K. Ugo-Beke, H. D. Sikes, *ACS Catal.*, 2018, **8**, 6394-6400.
- [2] X.-J. Yang, B. Chen, L.-Q. Zheng, L.-Z. Wu, C.-H. Tung, *Green Chem.*, 2014, **16**, 1082-1086.
- [3] S. Krishnan, P. N. Patel, K. K. Balasubramanian, A. Chadha, *New J. Chem.*, 2021, **45**, 1915-1923.
- [4] K. J. Prathap, Q. Wu, R. T. Olsson, P. Dinér, *Org. Lett.*, 2017, **19**, 4746-4749.
- [5] D. Zhang, H. Sun, L. Zhang, Y. Zhou, C. Li, H. Jiang, K. Chen, H. Liu, *Chem. Commun.*, 2012, **48**, 2909-2911.
- [6] D. Wang, Q. Cai, K. Ding, *Adv. Synth. Catal.*, 2009, **351**, 1722-1726.
- [7] G.-B. Wang, K.-H. Xie, J.-L. Kan, H.-P. Xu, F. Zhao, Y.-J. Wang, Y. Geng, Y.-B. Dong, *Chem. Commun.*, 2023, **59**, 1493-1496.
- [8] M. Fujita, M. Nagai, T. INOUE, *Chem. Pharm. Bull.*, 1982, **30**, 1151-1156.
- [9] S. Fujita, S. Yamaguchi, J. Yamasaki, K. Nakajima, S. Yamazoe, T. Mizugaki, T. Mitsudome, *Chem. Eur. J.*, 2021, **27**, 4439-4446.
- [10] R. R. Anugu, S. Munnuri, J. R. Falck, *J. Am. Chem. Soc.*, 2020, **142**, 5266-5271.
- [11] T. Portada, D. Margetić, V. Štrukil, *Molecules.*, 2018, **23**, 3163.
- [12] V. Kandathil, T. S. Koley, K. Manjunatha, R. B. Dateer, R. S. Keri, B. S. Sasidhar, S. A. Patil, S. A. Patil, *Inorganica Chim. Acta*, 2018, **478**, 195-210.
- [13] M. Gholinejad, N. Dasvarz, M. Shojafar, J. M. Sansano, *Inorganica Chim. Acta*, 2019, **495**, 118965.
- [14] C. Qin, P. Feng, Y. Ou, T. Shen, T. Wang, N. Jiao, *Angew. Chem., Int. Ed.*, 2013, **52**, 7850-7854.
- [15] N. Shen, S.-J. Zhai, C. W. Cheung, J.-A. Ma, *Chem. Commun.*, 2020, **56**, 9620-9623.
- [16] V. Kumar, S. Dhawan, R. Bala, S. B. Mohite, P. Singh, R. Karpoomath, *Org. Biomol. Chem.*, 2022, **20**, 6931-6940.
- [17] S. Wang, J. Yang, D. Li, J. Yang, *Eur. J. Org. Chem.*, 2021, **2021**, 6768-6772.
- [18] Q. Nie, F. Yi, B. Huang, M. Cai, *Adv. Synth. Catal.*, 2017, **359**, 3968-3976.

- [19] R. B. Sonawane, N. K. Rasal, S. V. Jagtap, *Org. Lett.*, 2017, **19**, 2078-2081.  
 [20] S. K. Xiang, D. X. Zhang, H. Hu, J. L. Shi, L. G. Liao, C. Feng, B. Q. Wang, K. Q. Zhao, P. Hu, H. Yang, W. H. Yu, *Adv. Synth. Catal.*, 2013, **355**, 1495-1499.  
 [21] L. Zhao, D. Cao, T. Chen, Y. Wang, Z. Miao, Y. Xu, W. Chen, X. Wang, Y. Li, Z. Du, *J. Med. Chem.*, 2013, **56**, 3833-3851.  
 [22] S. K. Xiang, J. M. Li, H. Huang, C. Feng, H. L. Ni, X. Z. Chen, B. Q. Wang, K. Q. Zhao, P. Hu, C. Redshaw, *Adv. Synth. Catal.*, 2015, **357**, 3435-3440.  
 [23] Y. Gao, J. Liu, Z. Li, T. Guo, S. Xu, H. Zhu, F. Wei, S. Chen, H. Gebru, K. Guo, *J. Org. Chem.*, 2018, **83**, 2040-2049.

### 18. Copy of Original $^1\text{H}$ NMR and $^{13}\text{C}$ NMR spectra

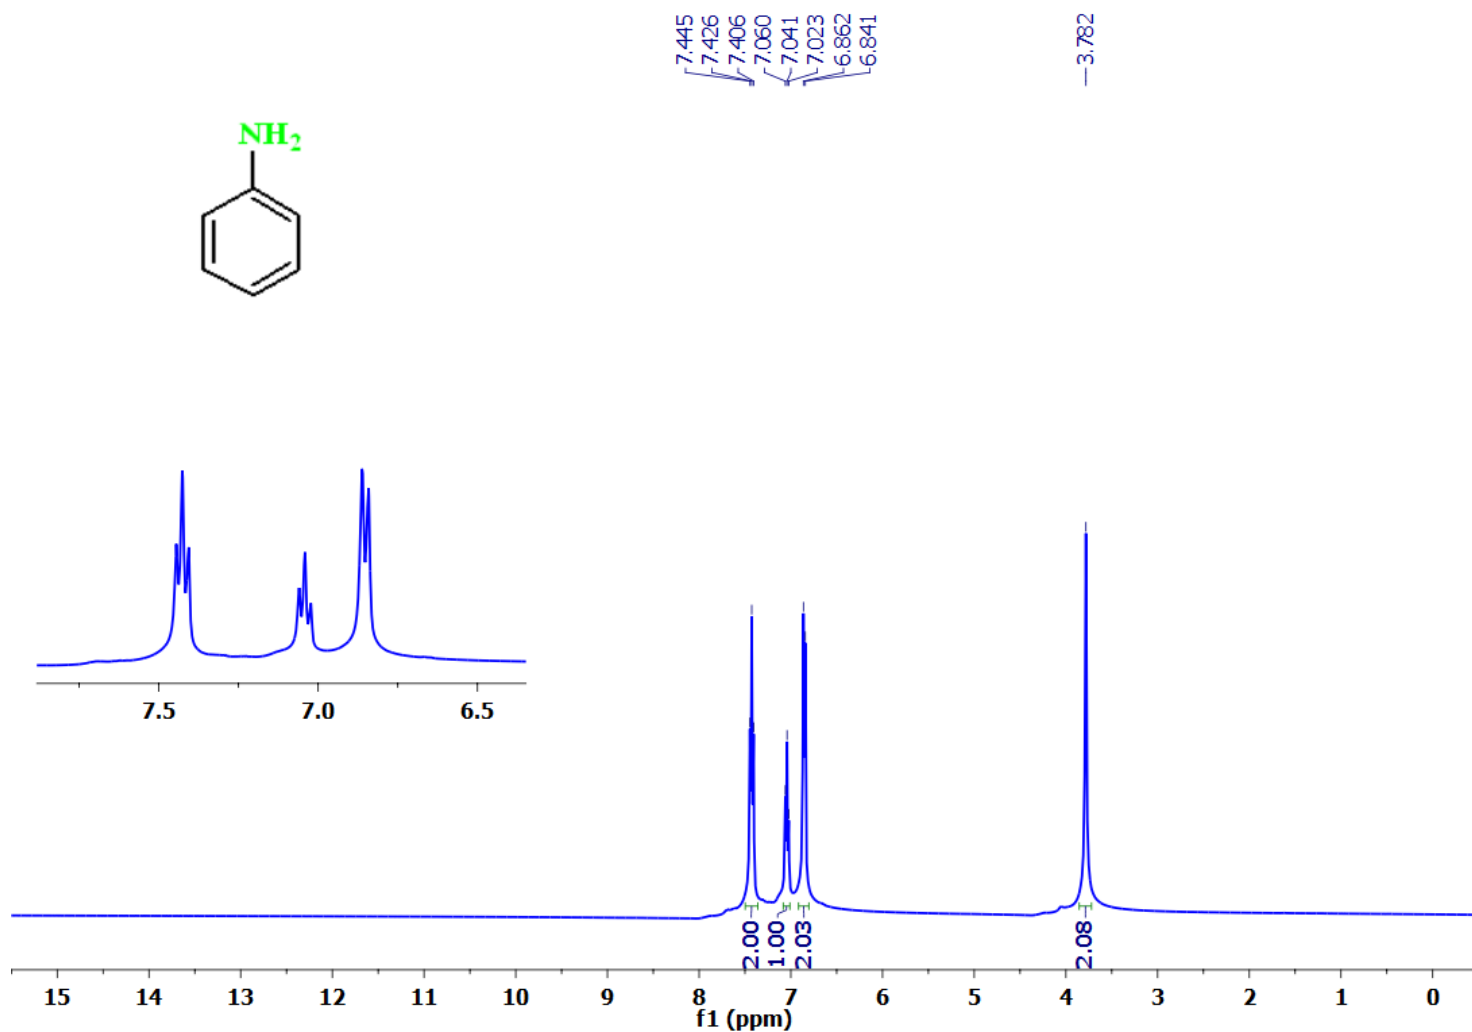

$^1\text{H}$  NMR of Aniline

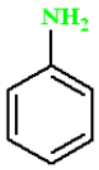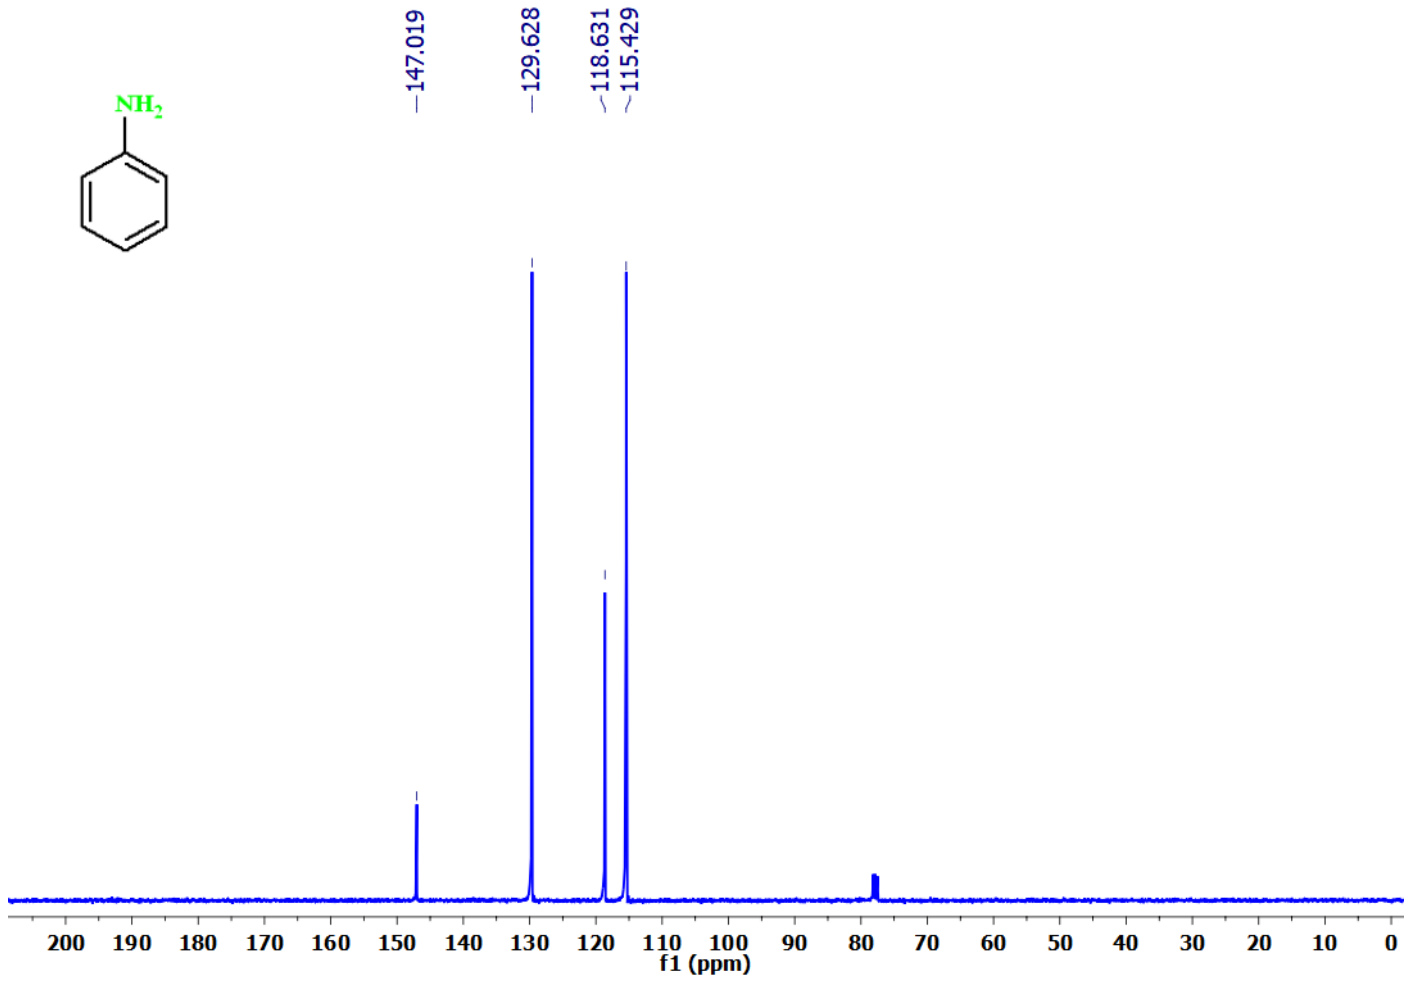

$^{13}\text{C}$  NMR of Aniline

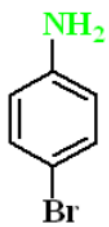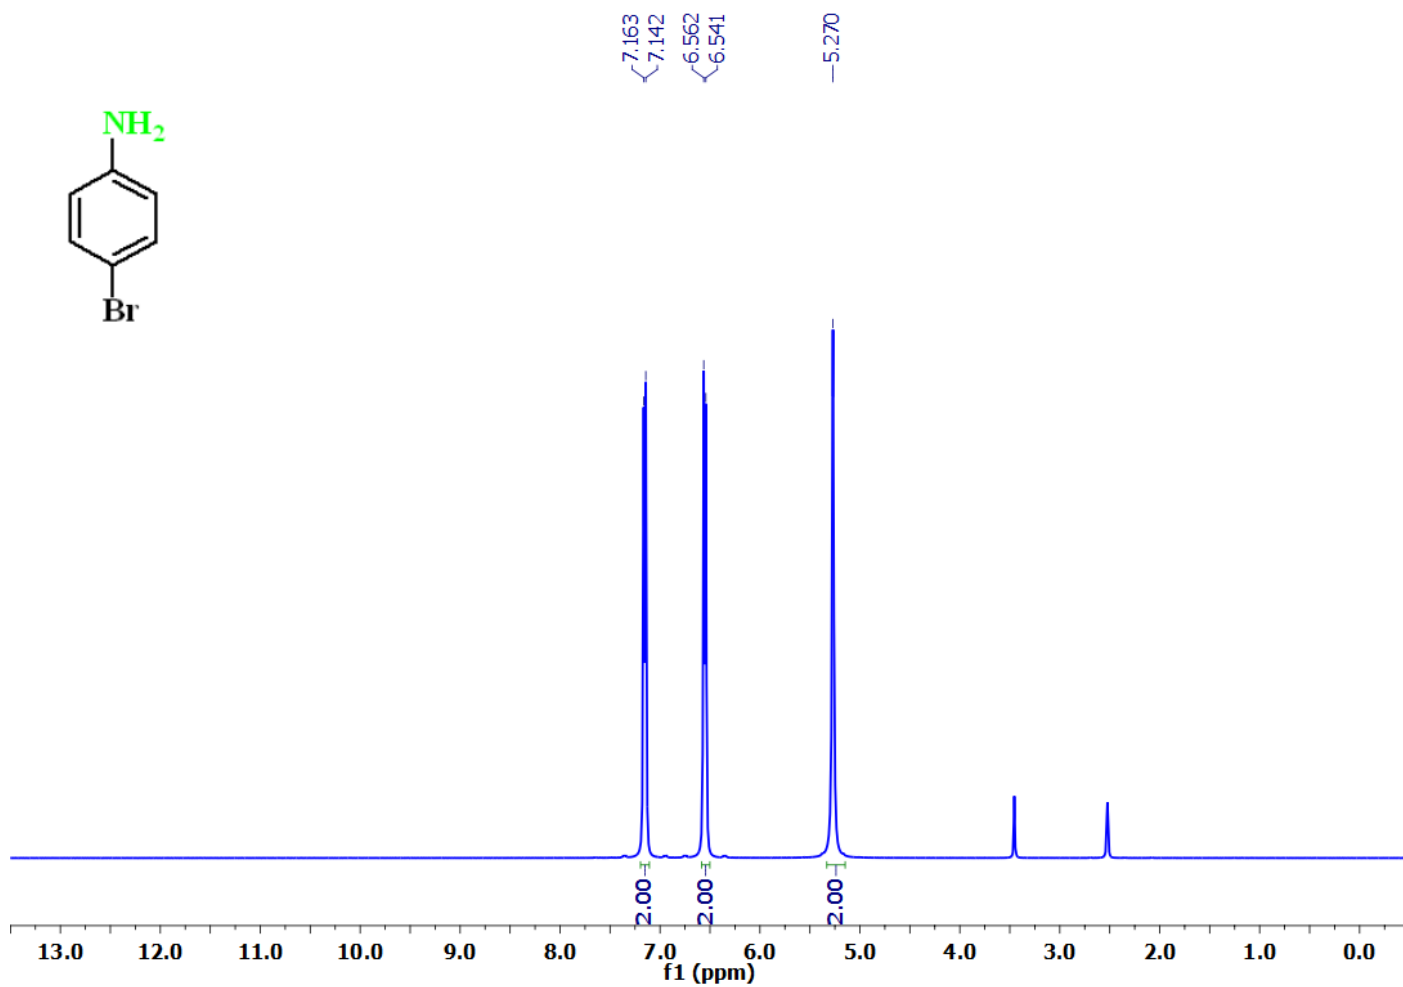

<sup>1</sup>H NMR of 4-Bromoaniline

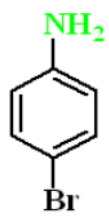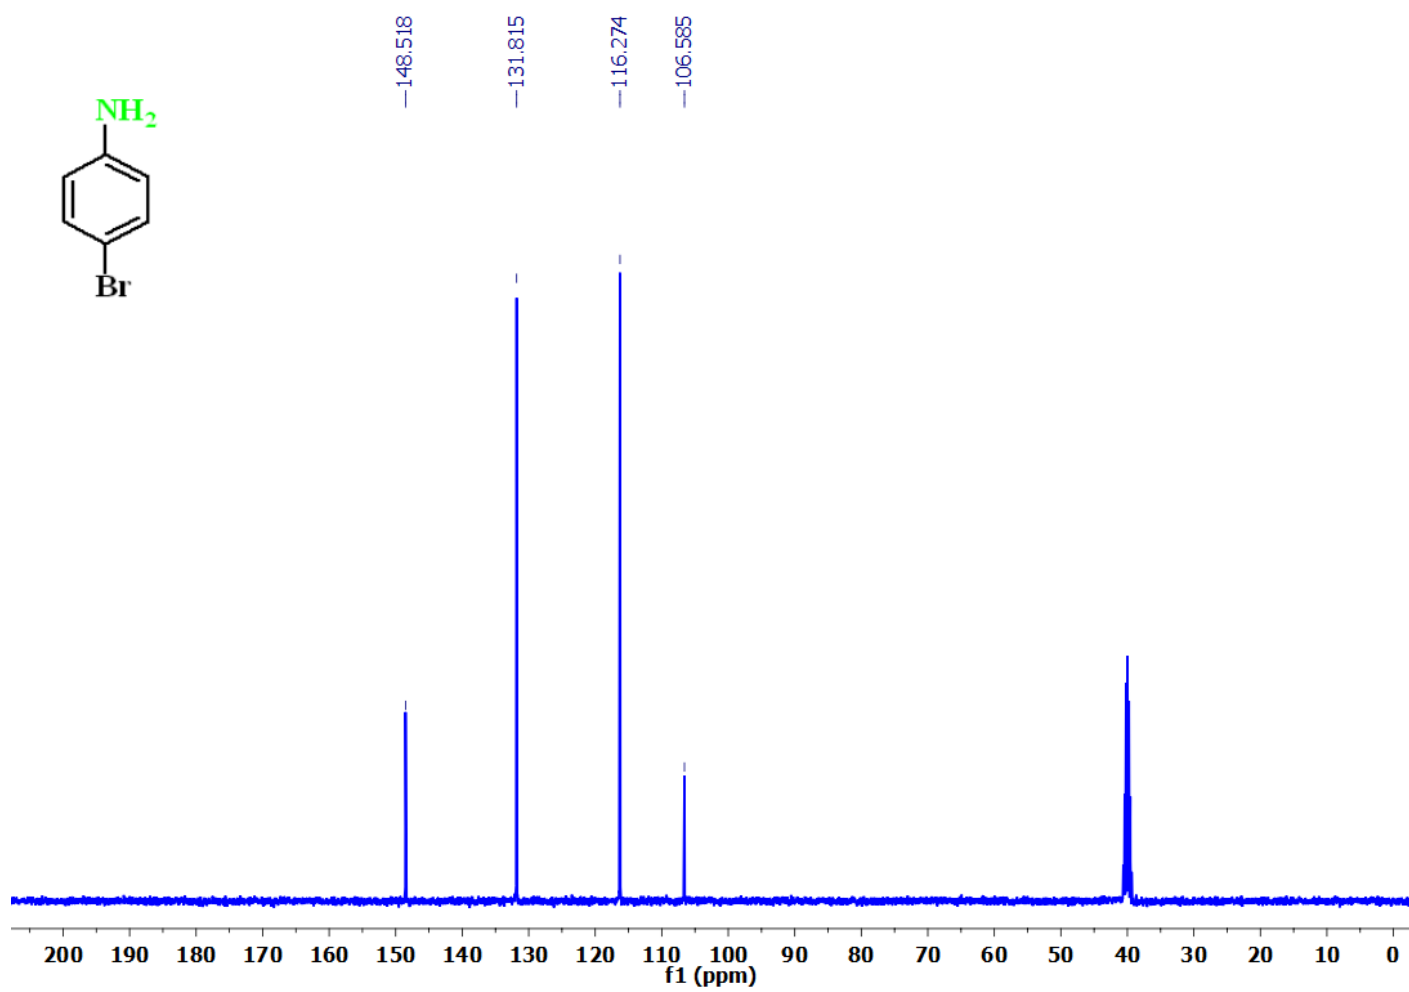

$^{13}\text{C}$  NMR of 4-Bromoaniline



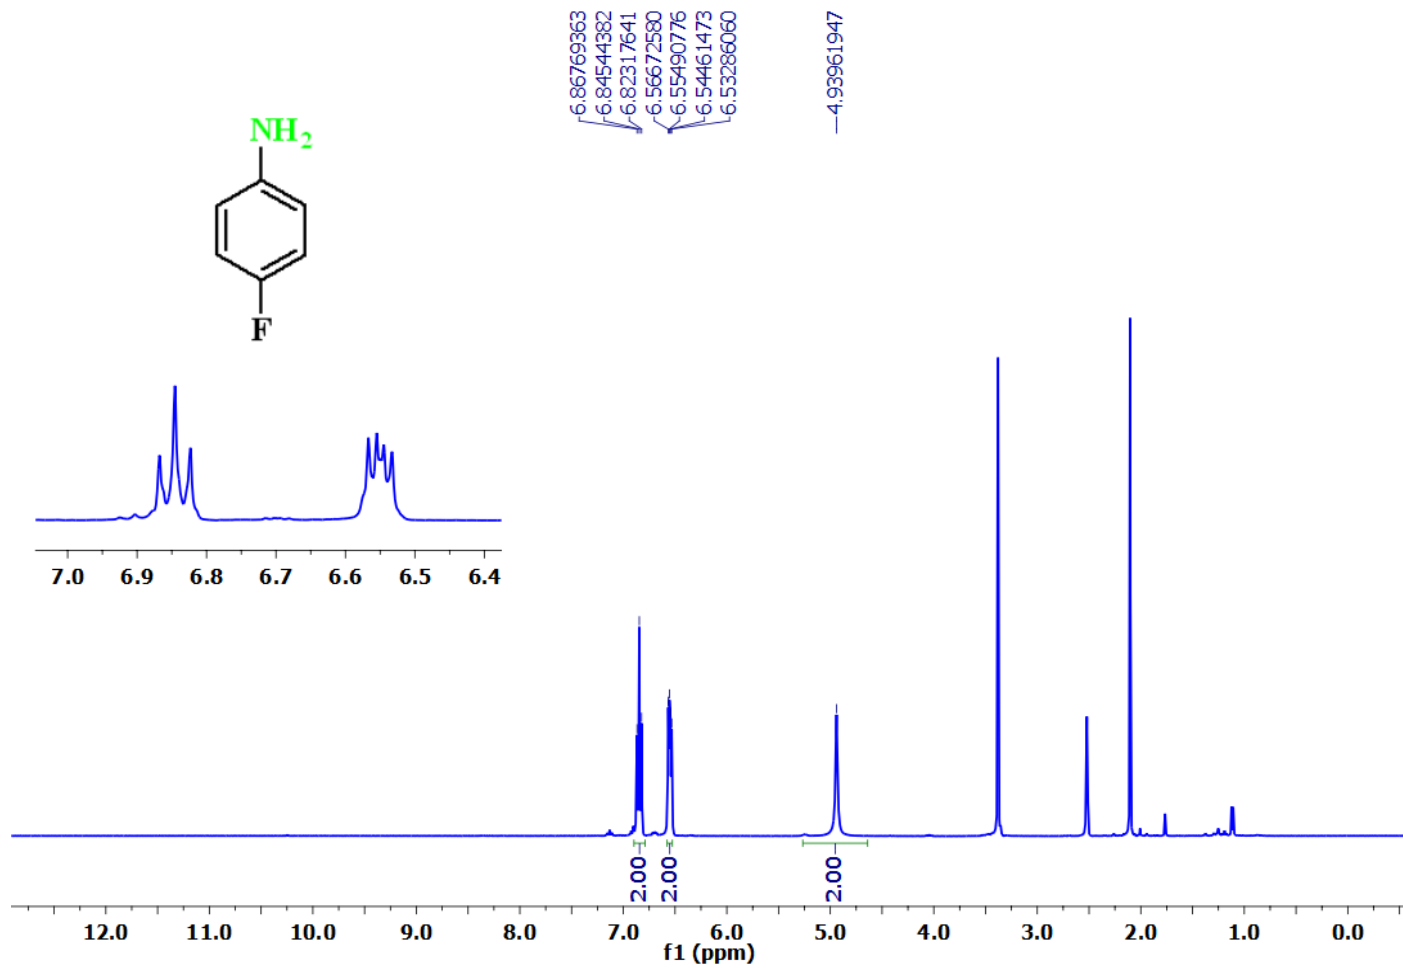

<sup>1</sup>H NMR of 4-Fluoroaniline

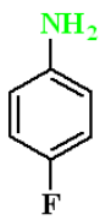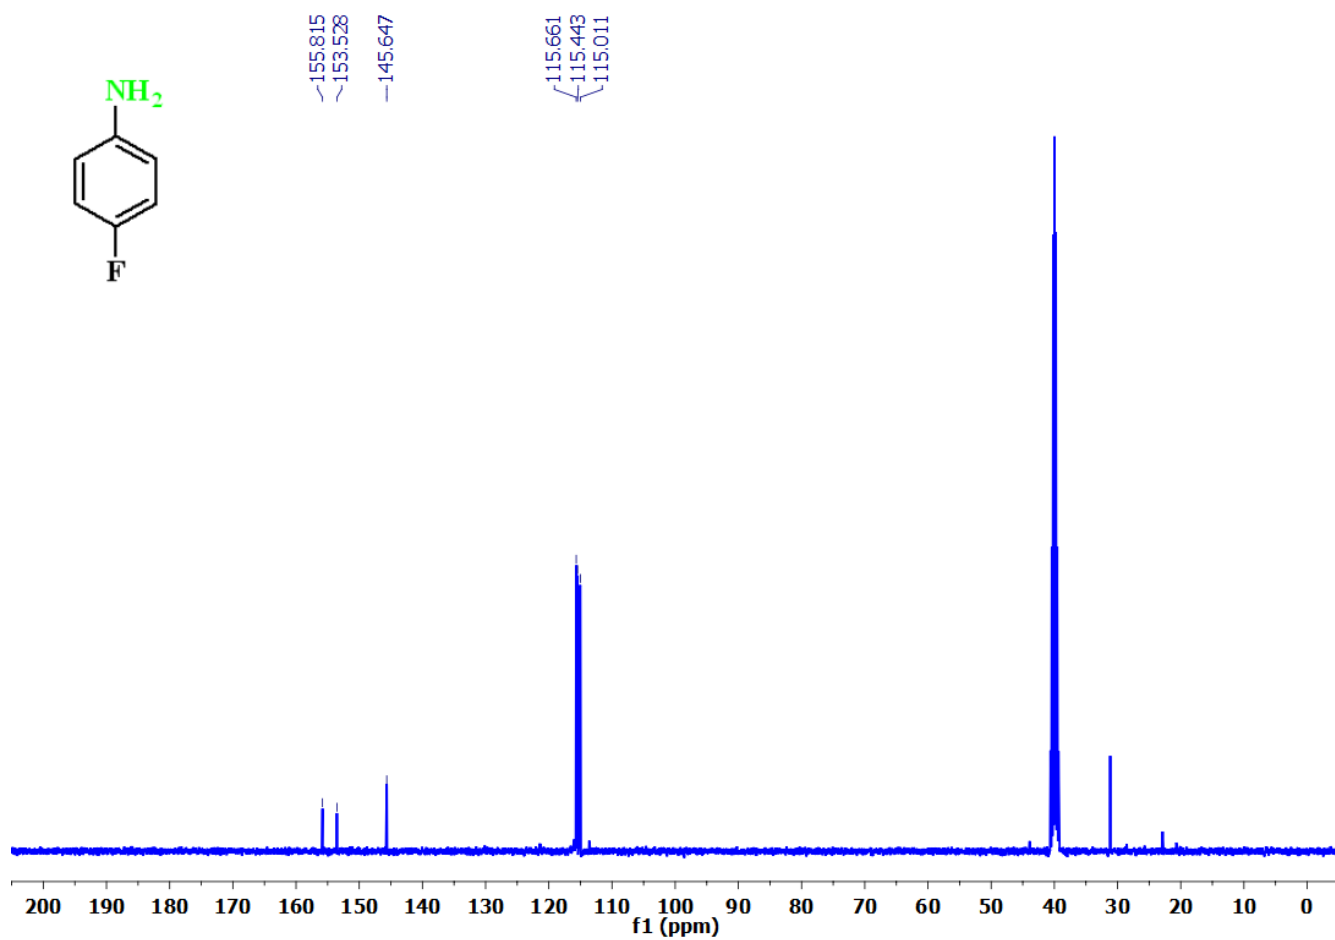

$^{13}\text{C}$  NMR of 4-Fluoroaniline

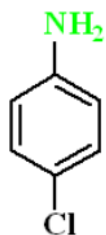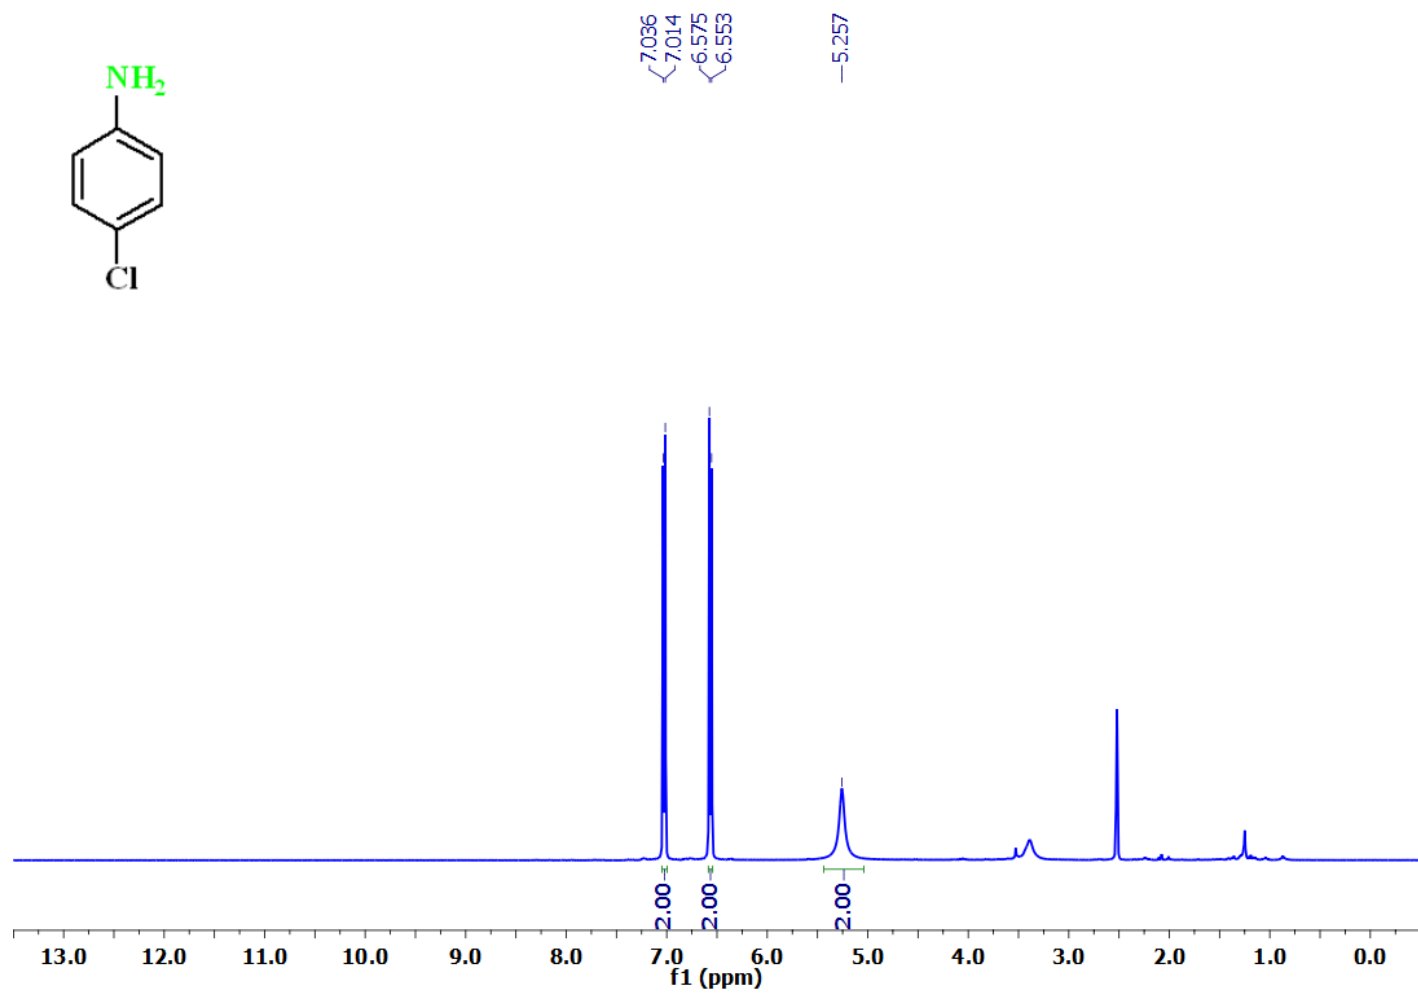

$^1\text{H}$  NMR of 4-Chloroaniline

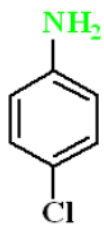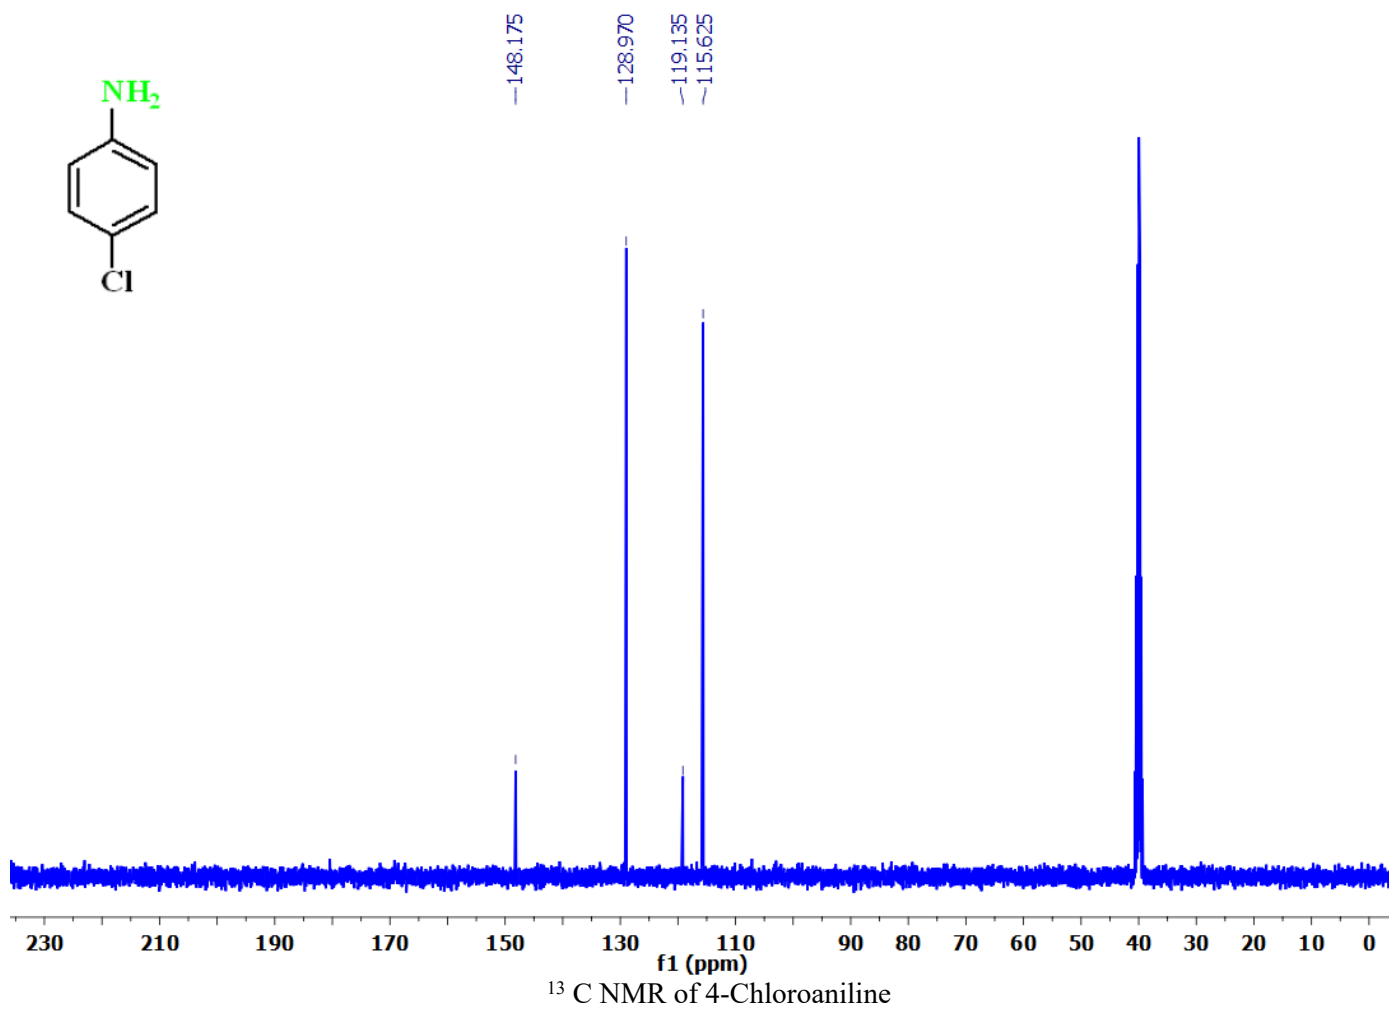

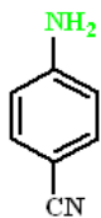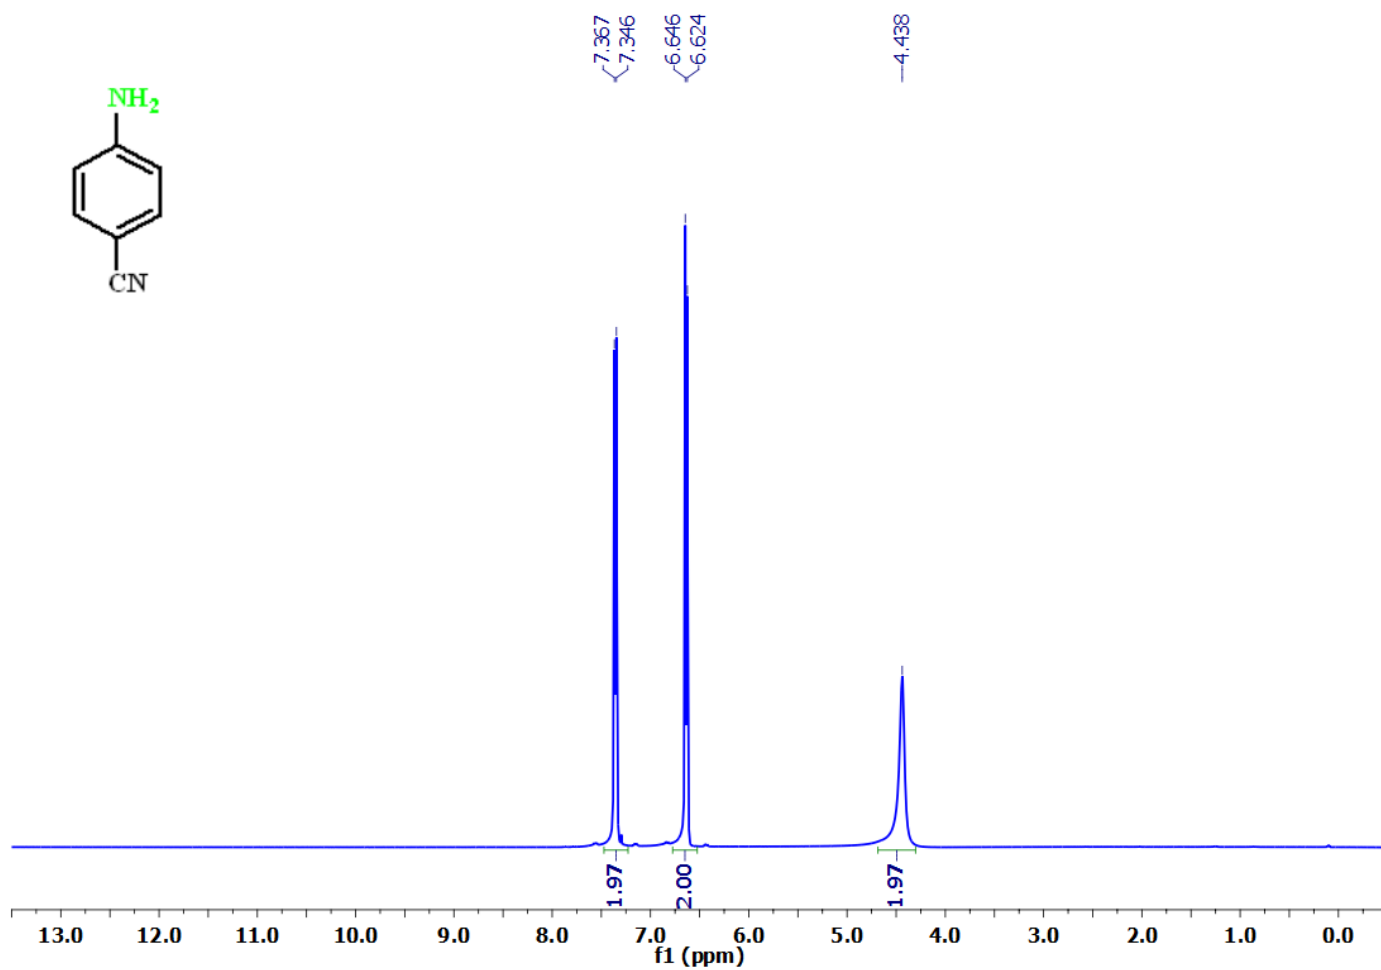

<sup>1</sup>H NMR of 4-Aminobenzonitrile

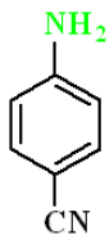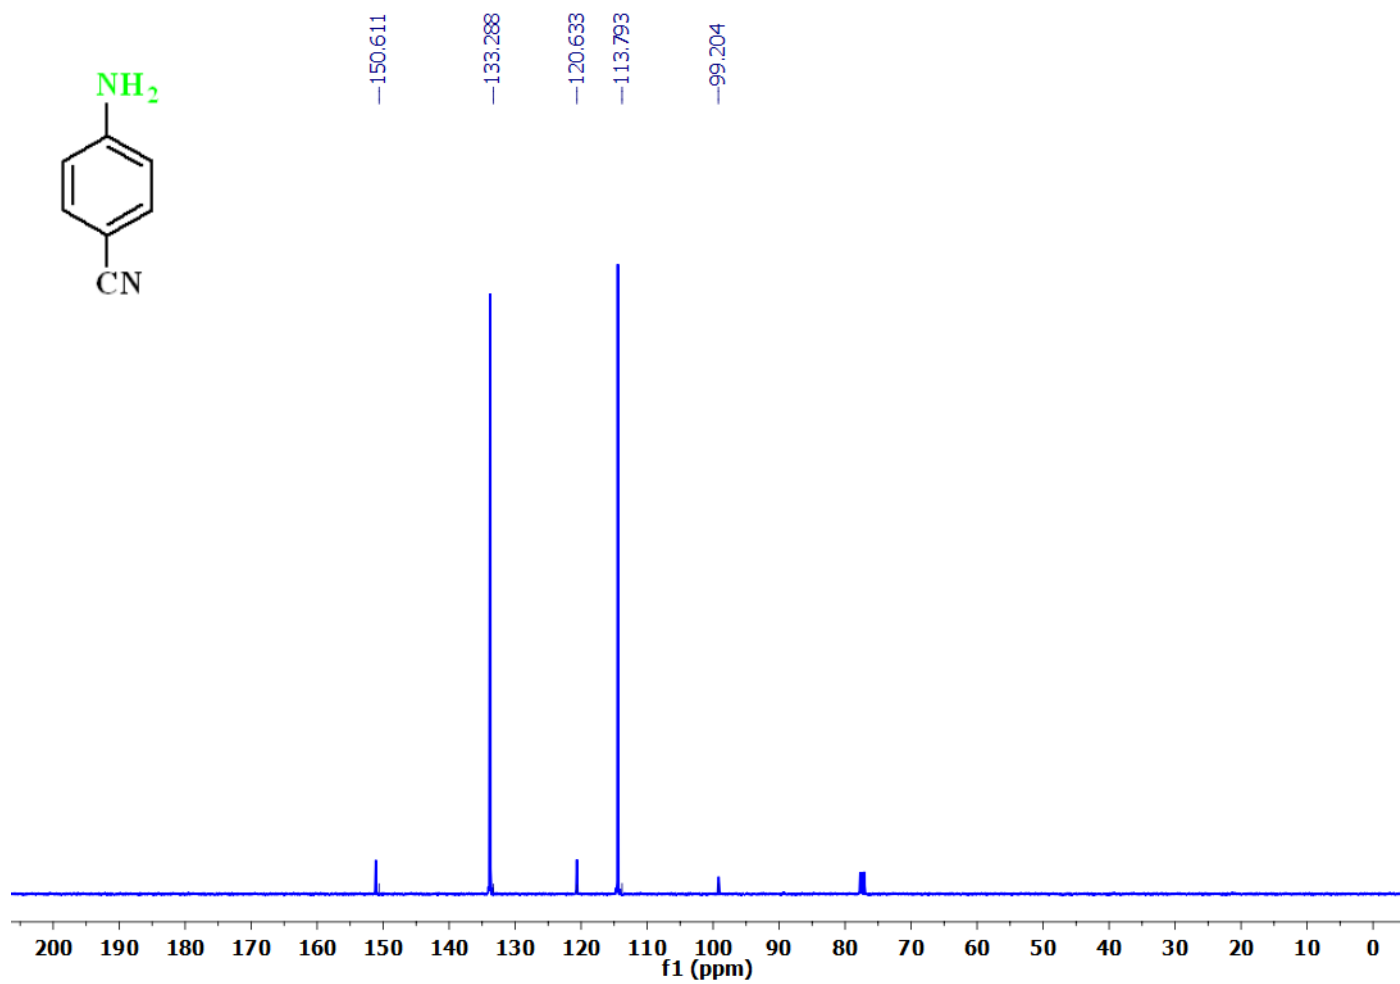

$^{13}\text{C}$  NMR of 4-Aminobenzonitrile

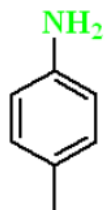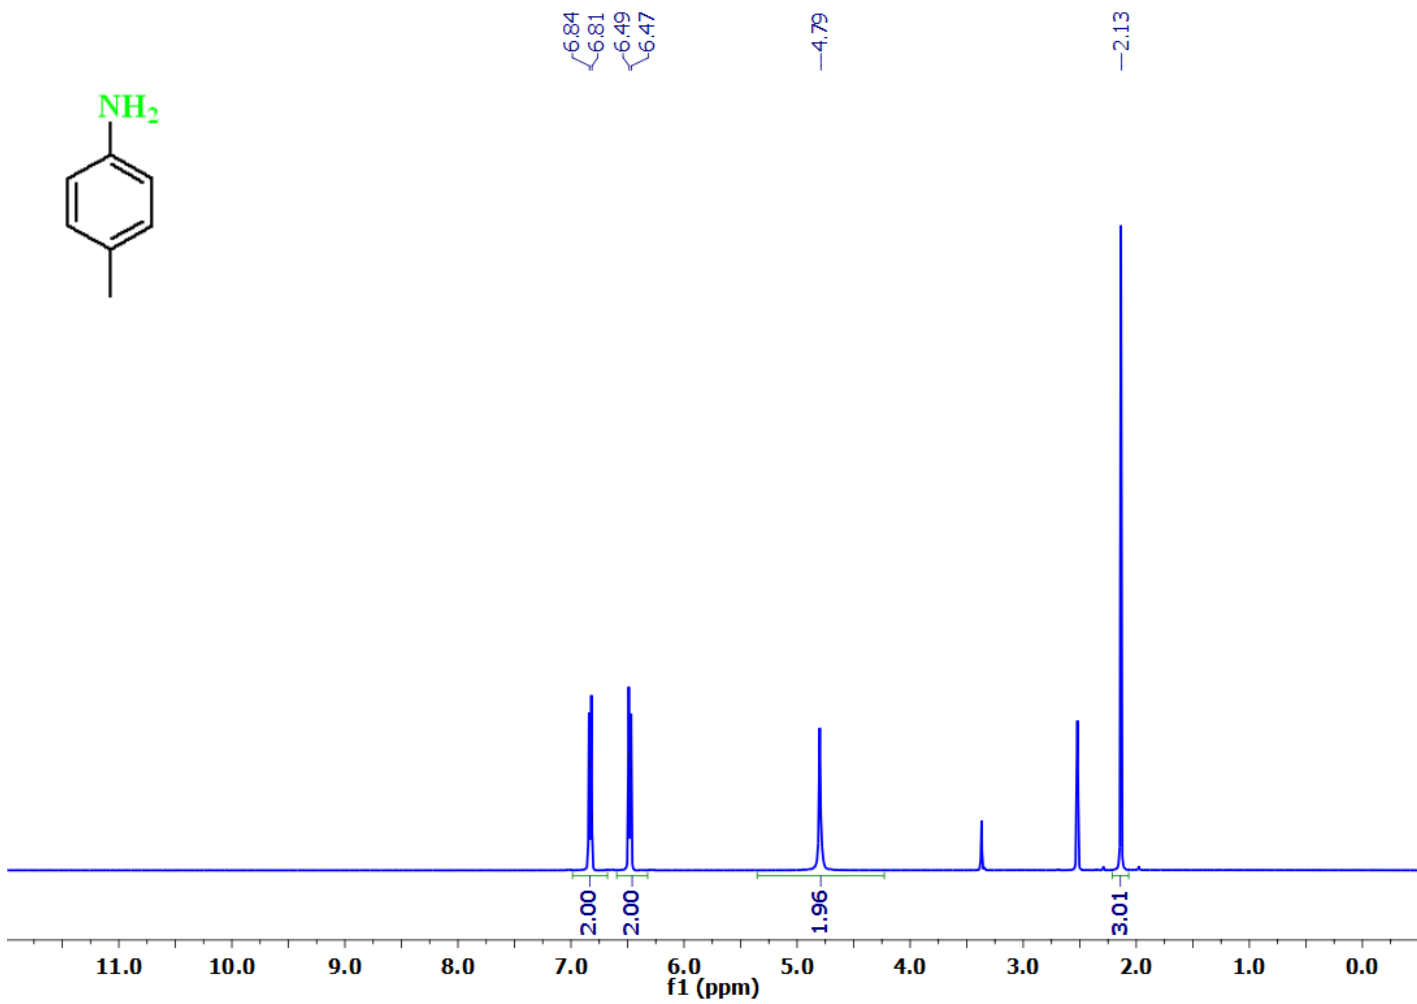

$^1\text{H}$  NMR of *p*-Toluidine

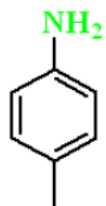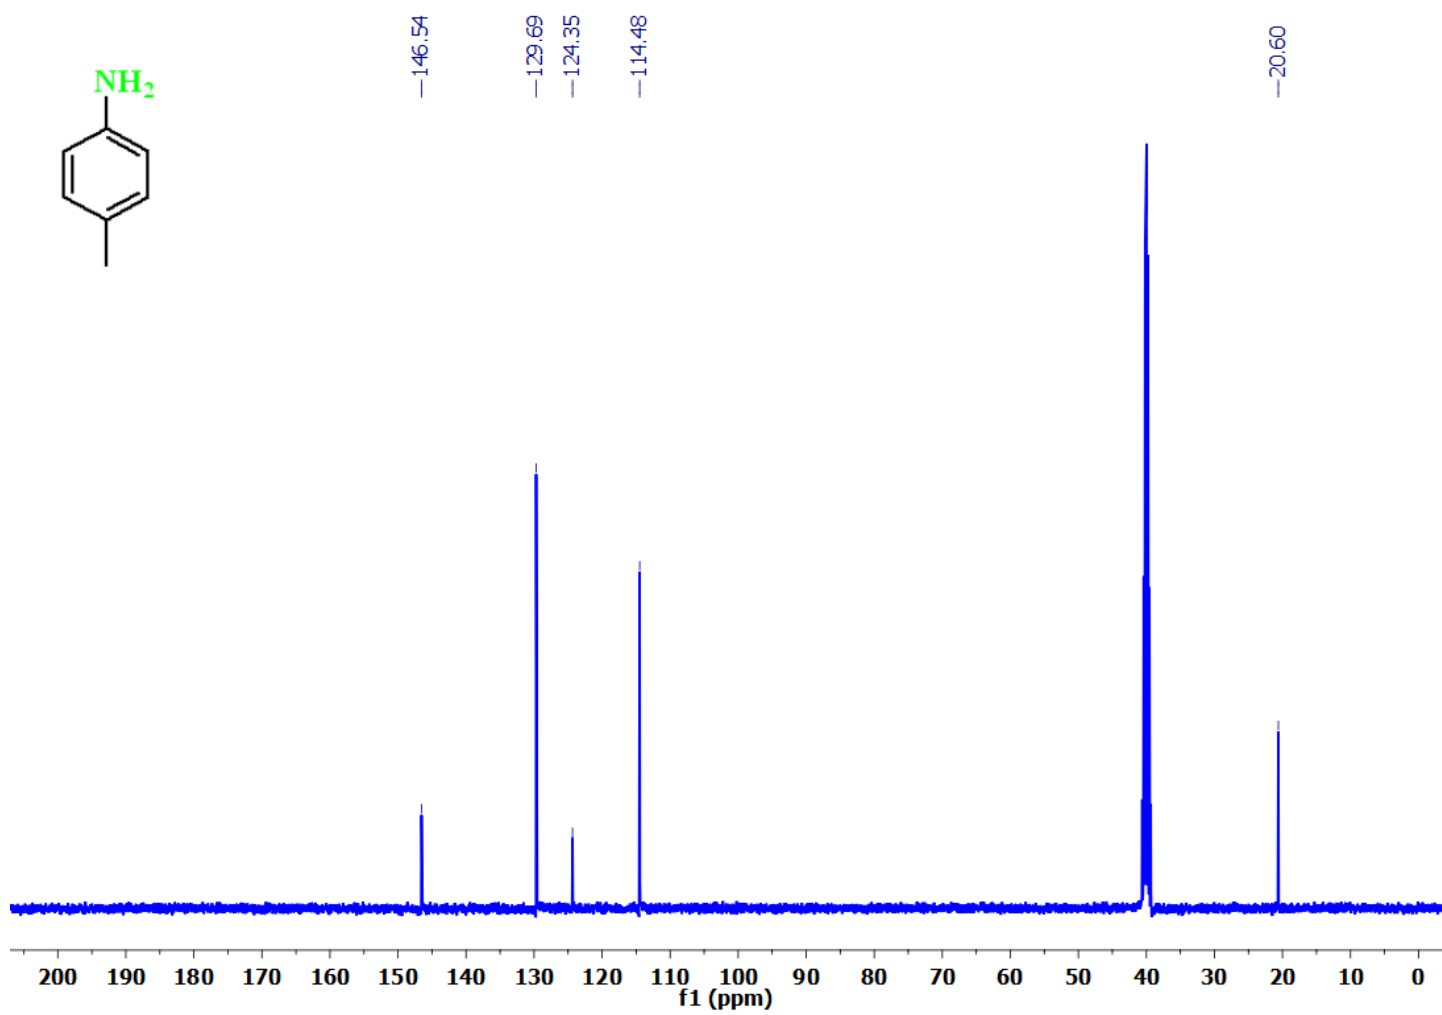

$^{13}\text{C}$  NMR of *p*-Toluidine



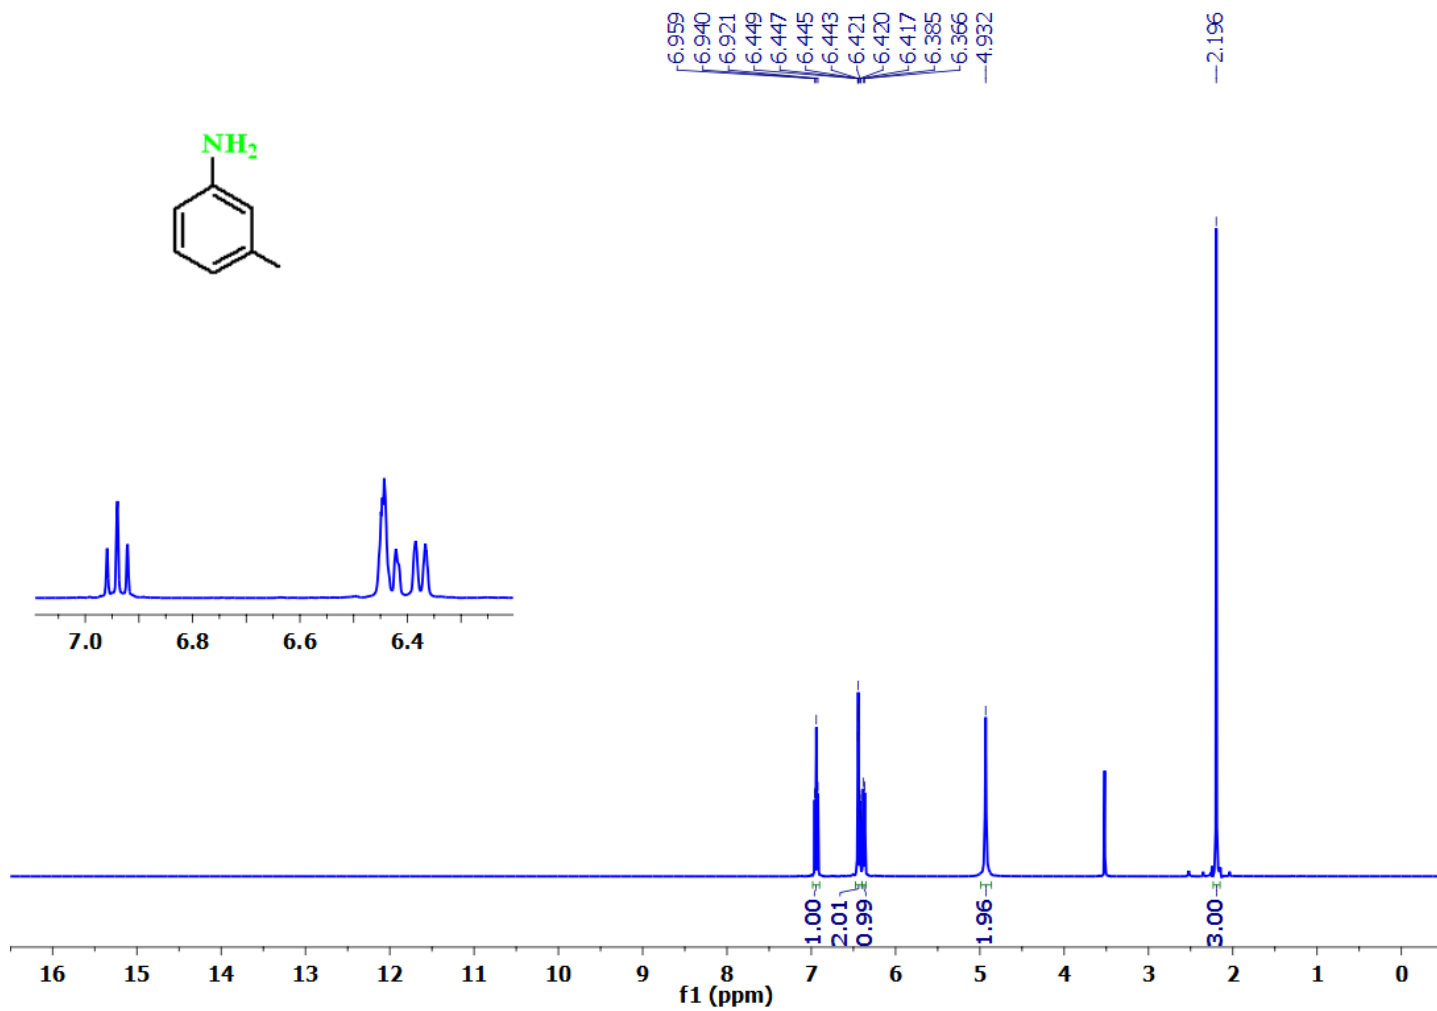

$^1\text{H}$  NMR of *m*-Toluidine

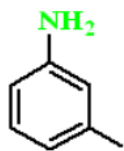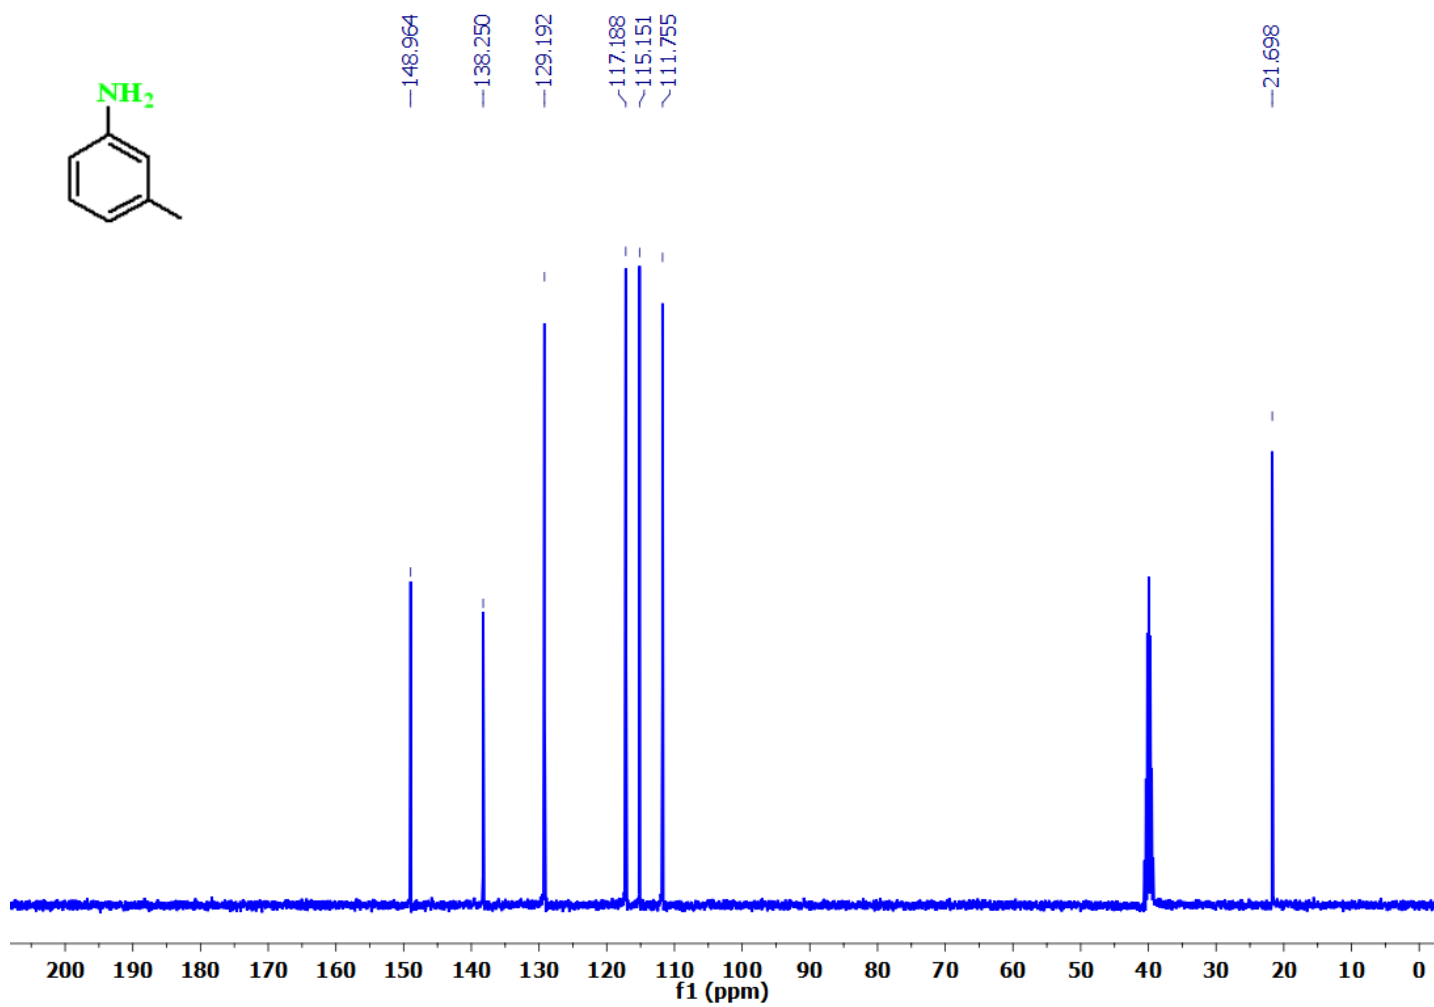

<sup>13</sup>C NMR of *m*-Toluidine

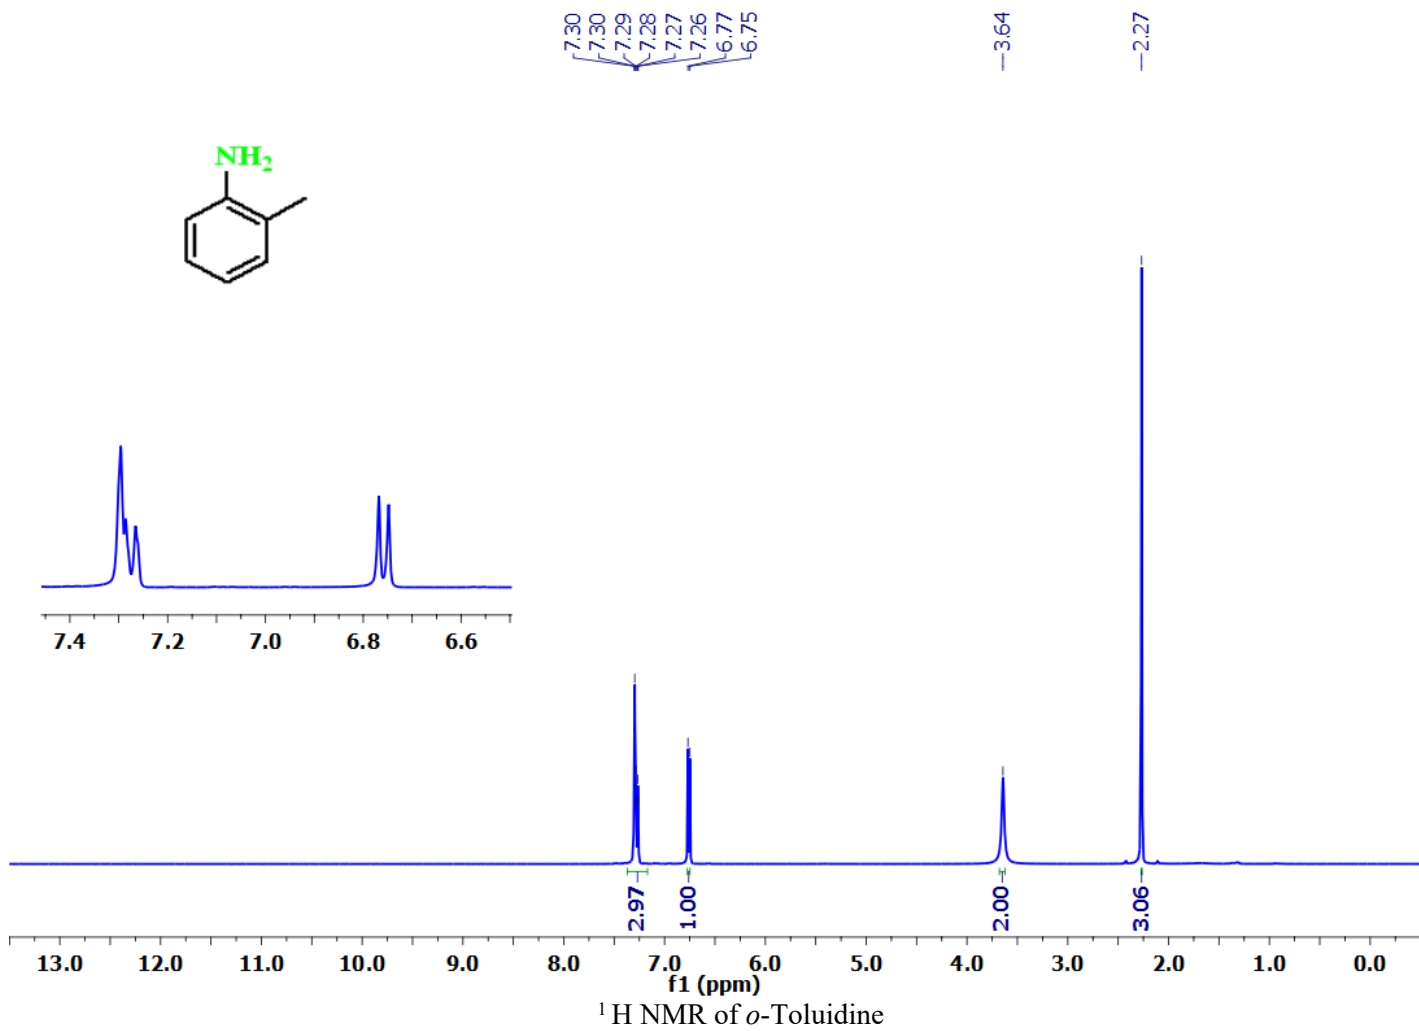

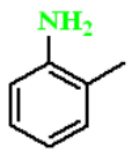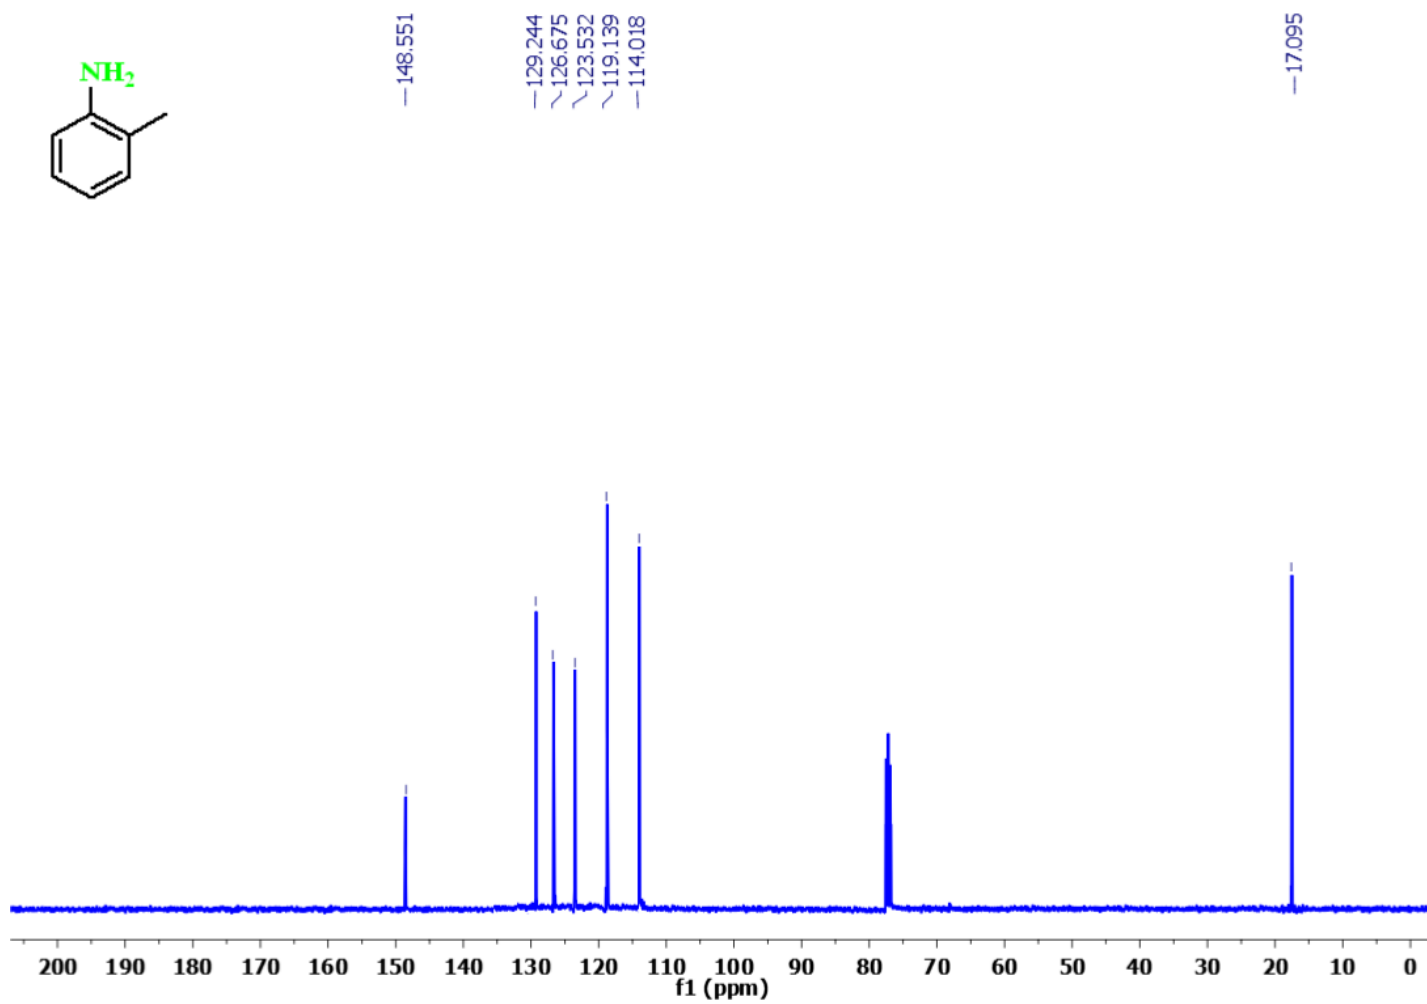

<sup>13</sup>C NMR of *o*-Toluidine

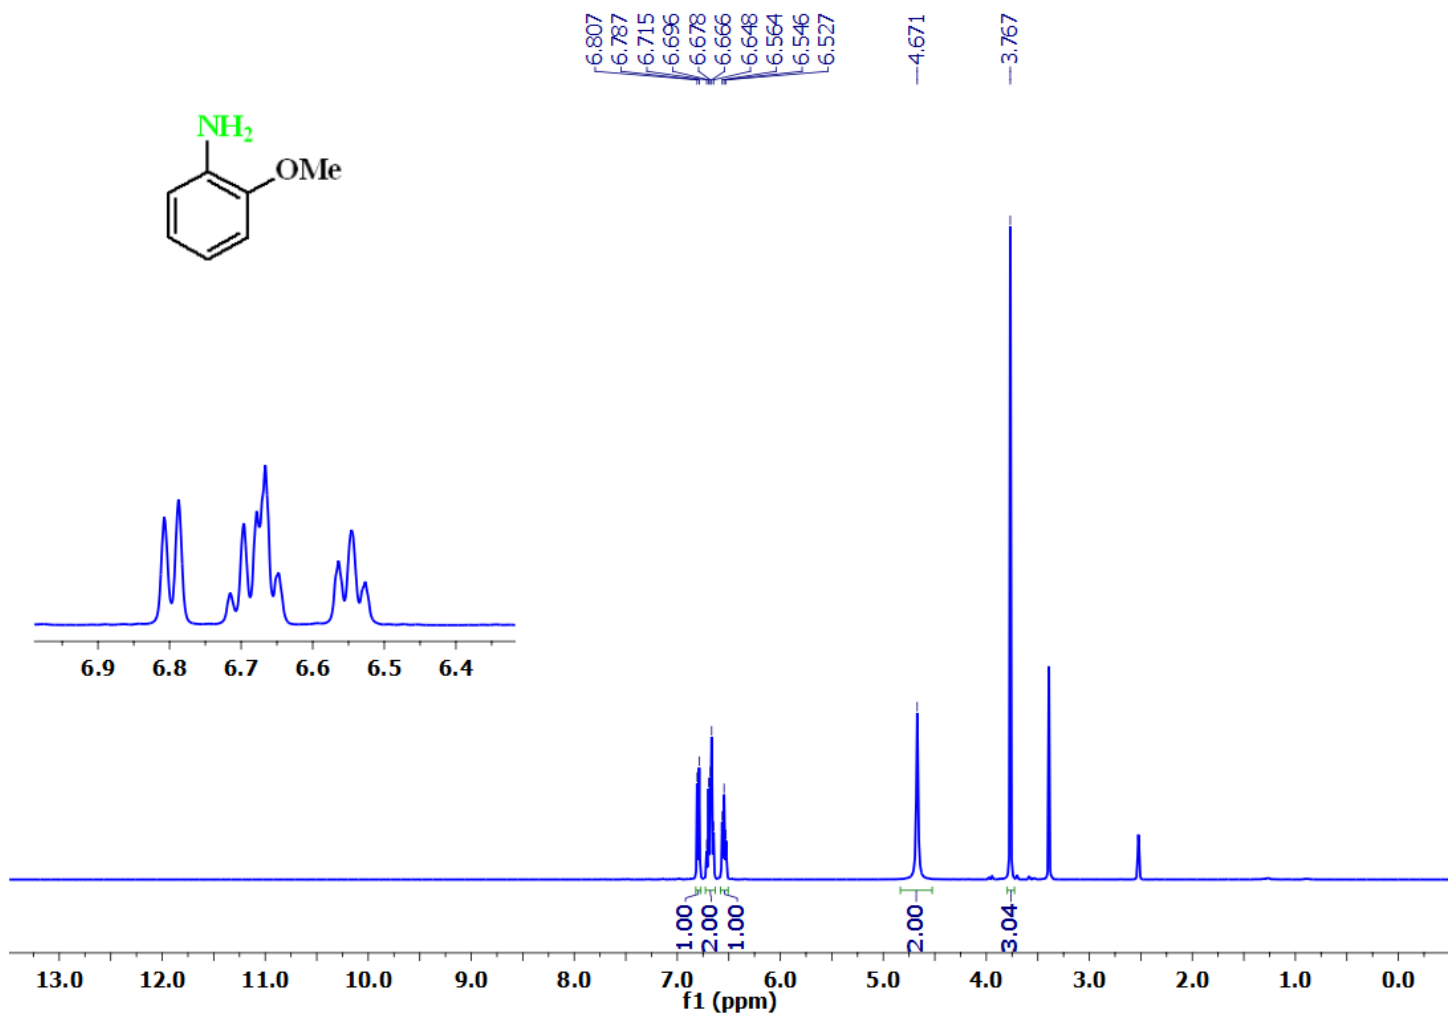

<sup>1</sup>H NMR of *o*-Anisidine

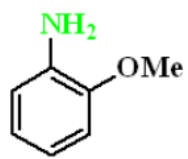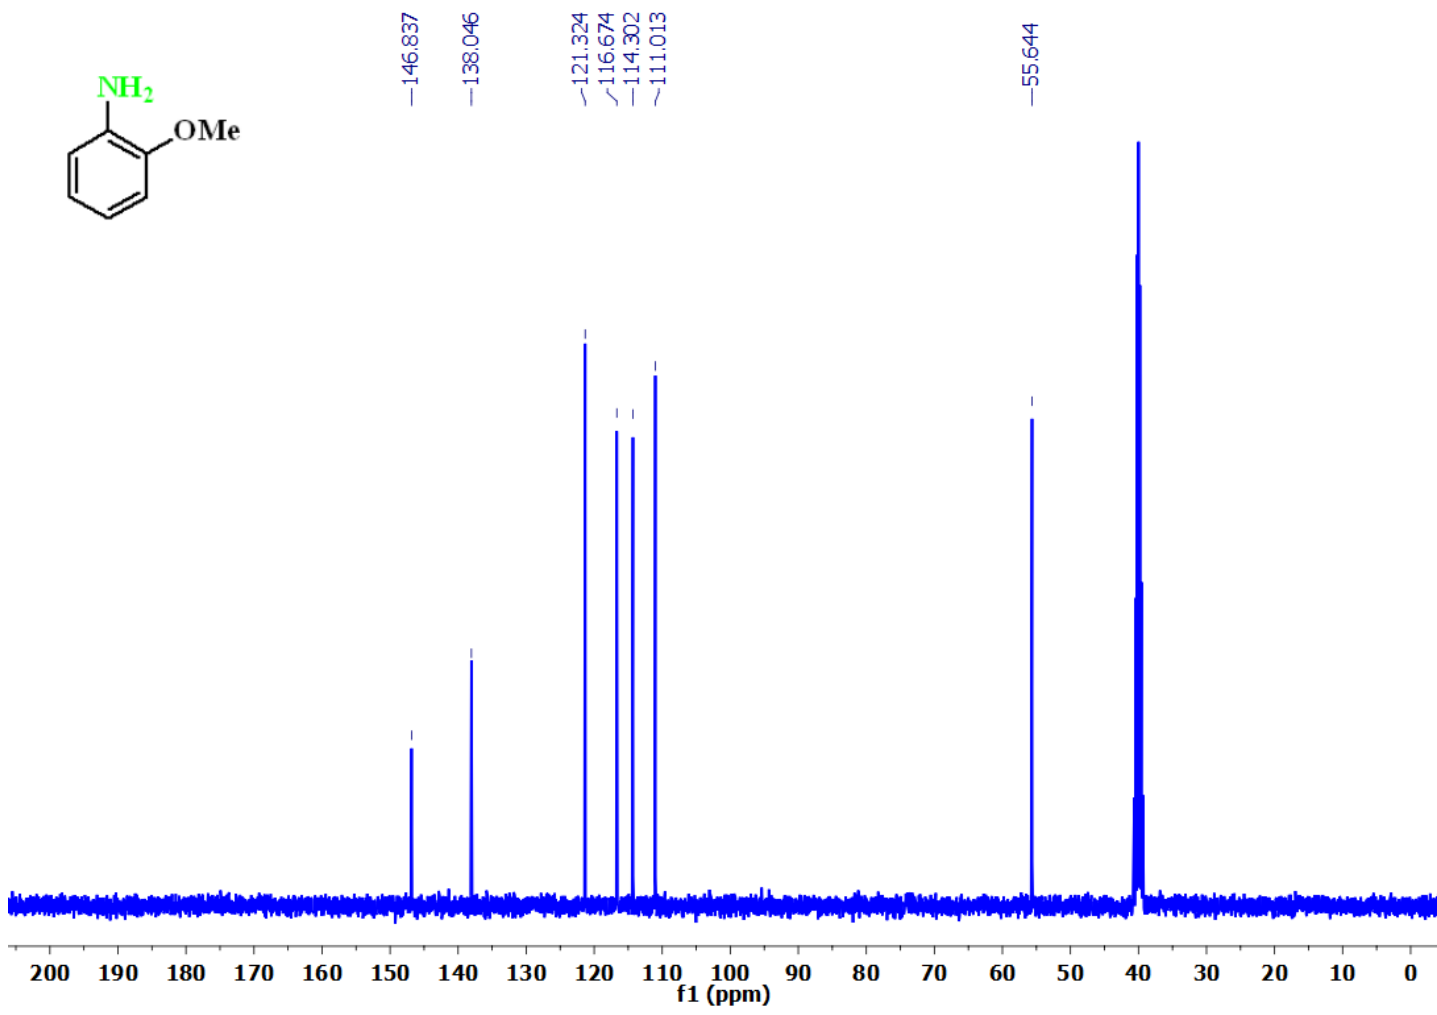

$^{13}\text{C}$  NMR of *o*-Anisidine

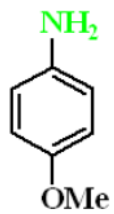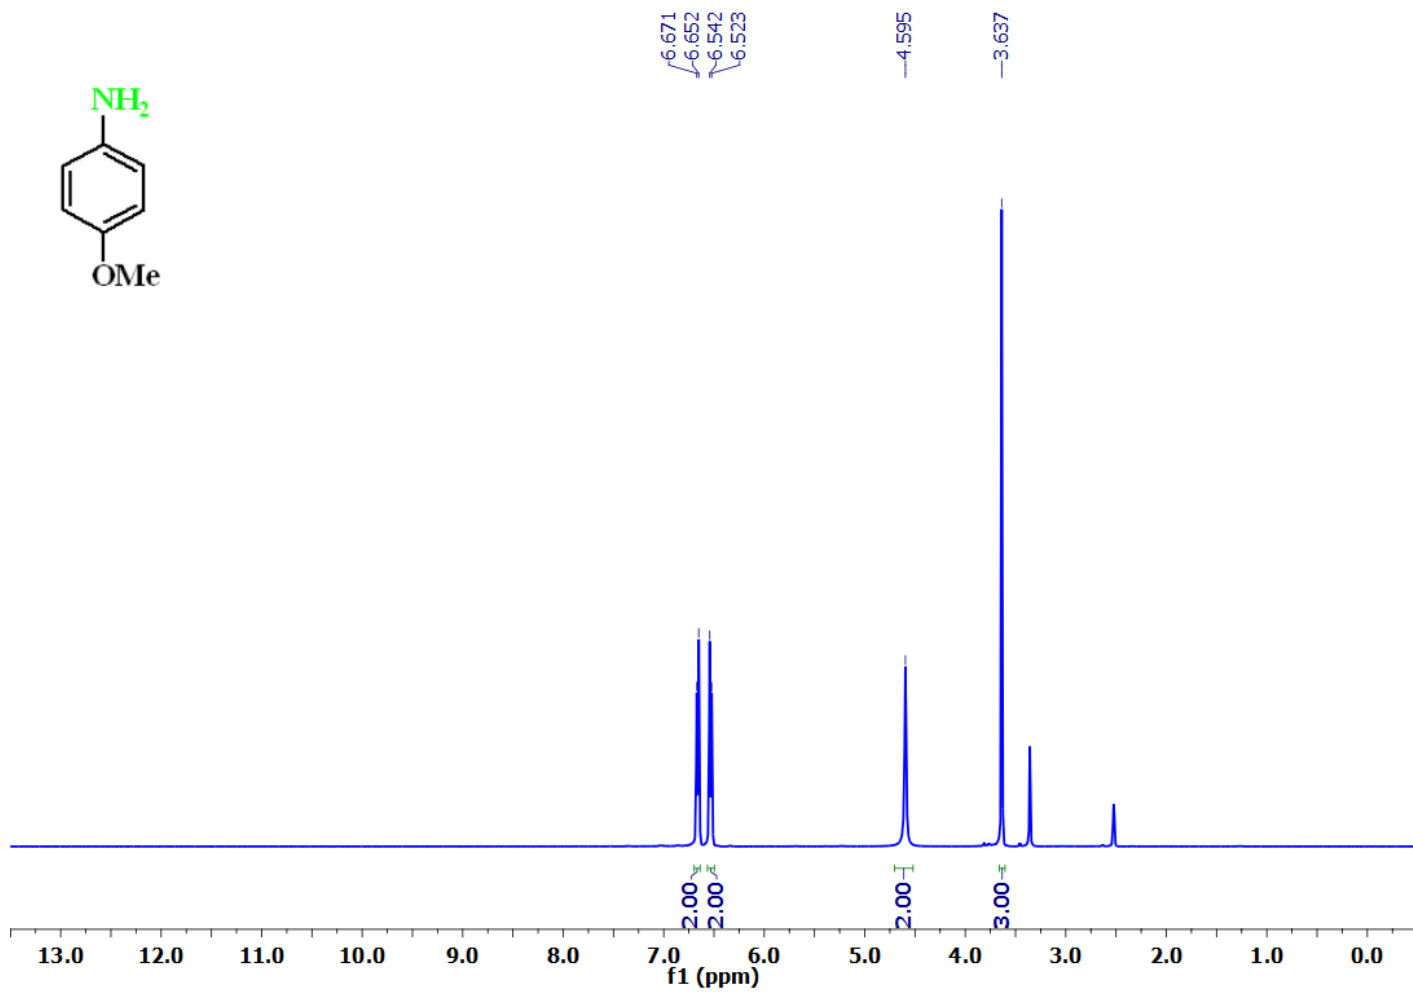

<sup>1</sup>H NMR of *p*-Anisidine

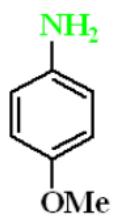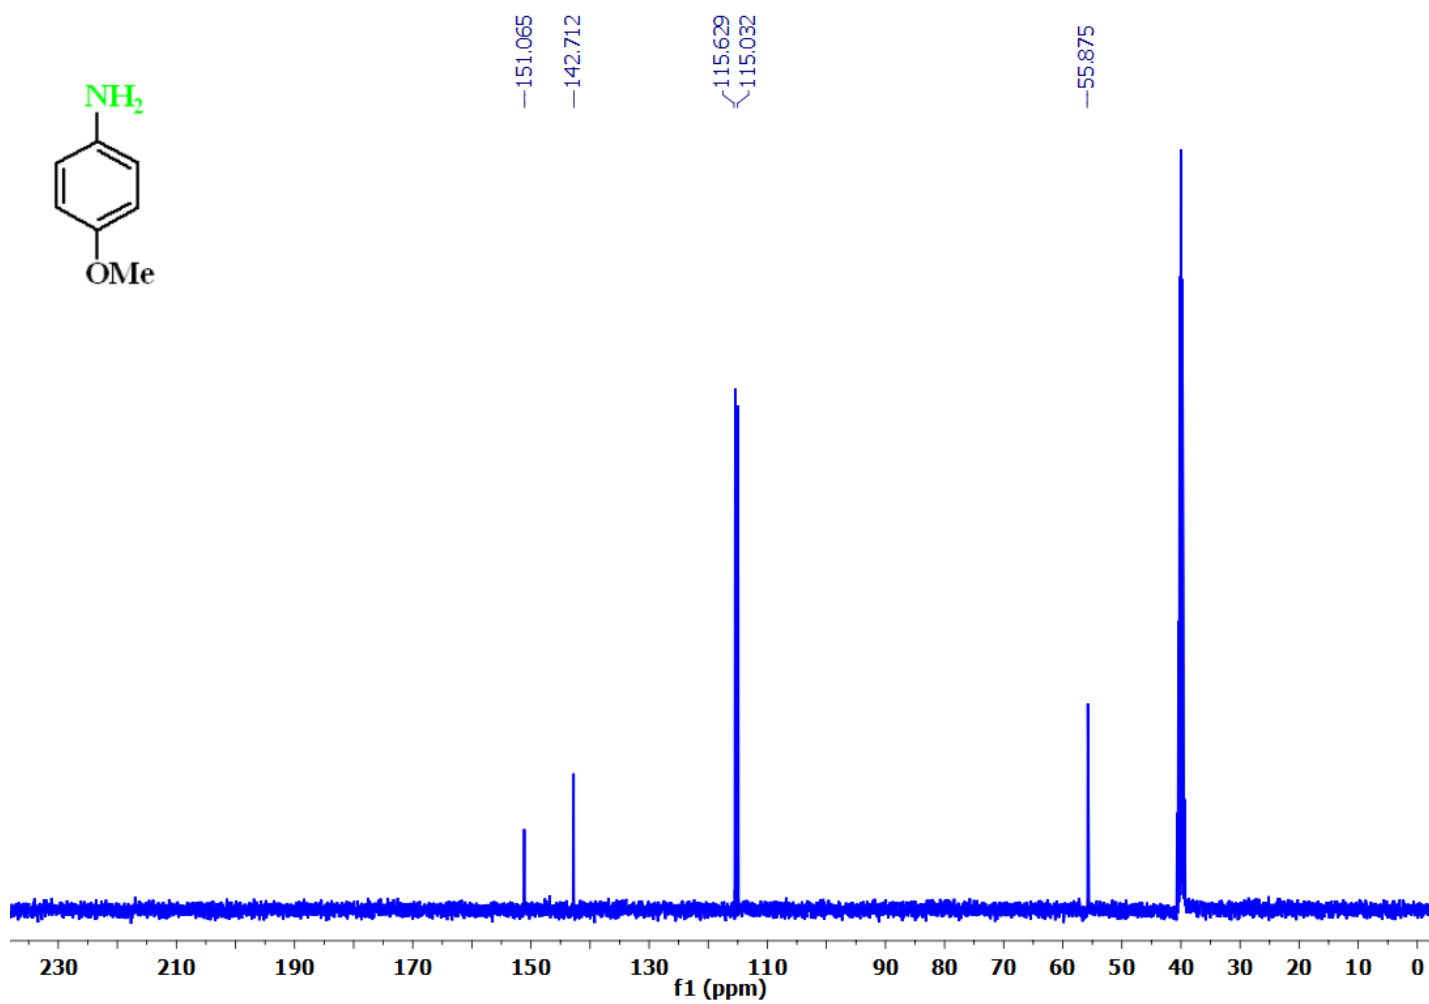

<sup>13</sup>C NMR of *p*-Anisidine



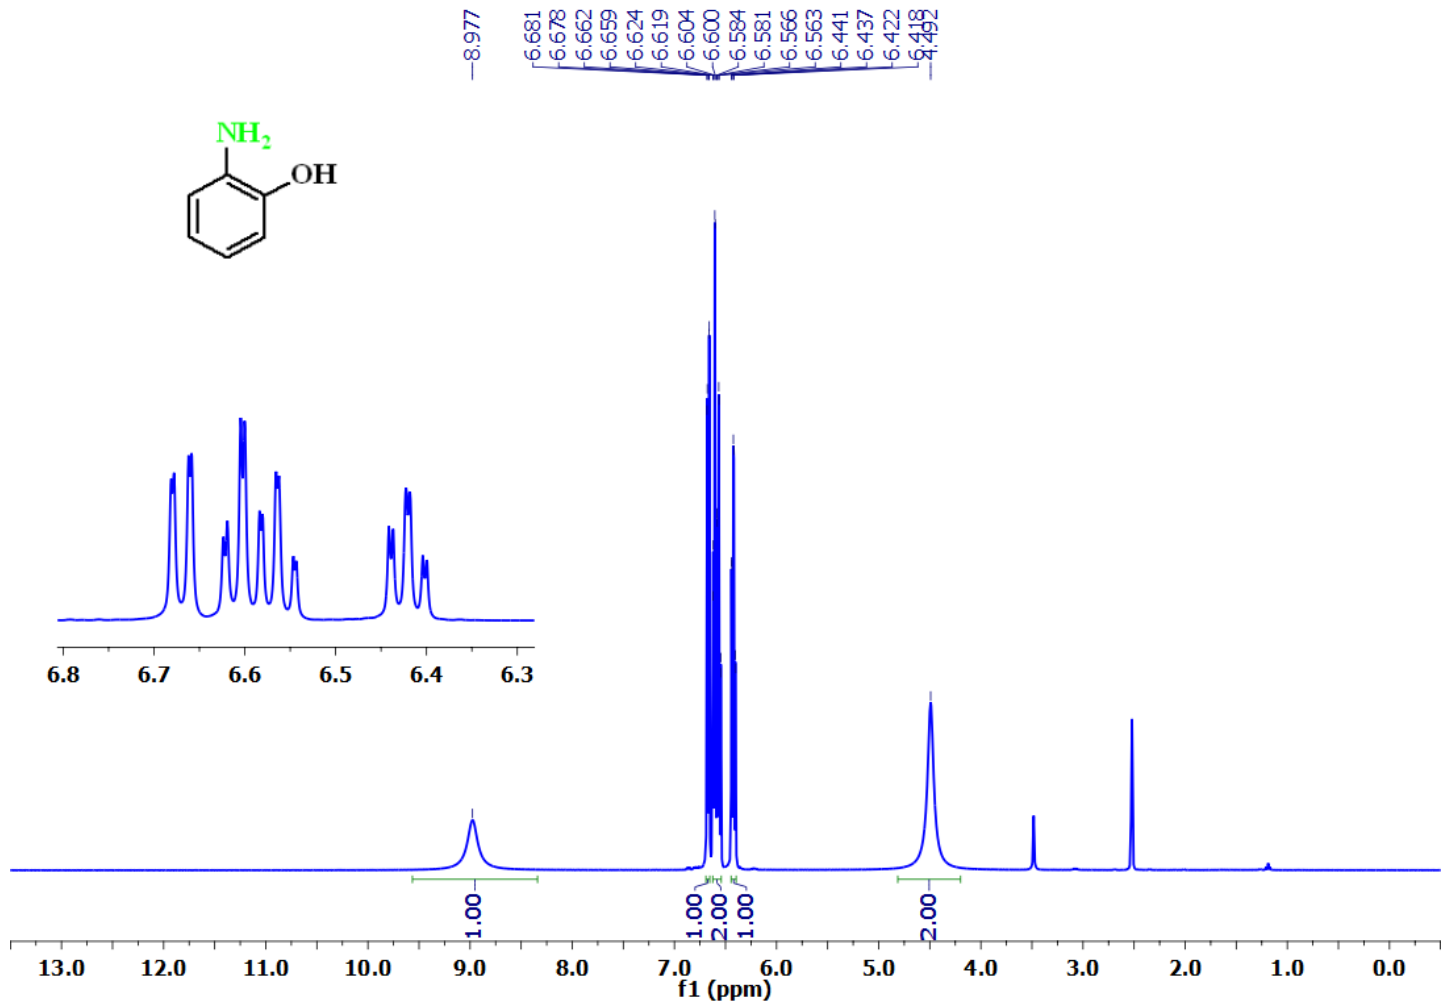

$^1\text{H}$  NMR of 2-Aminophenol

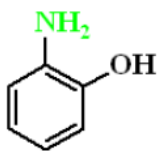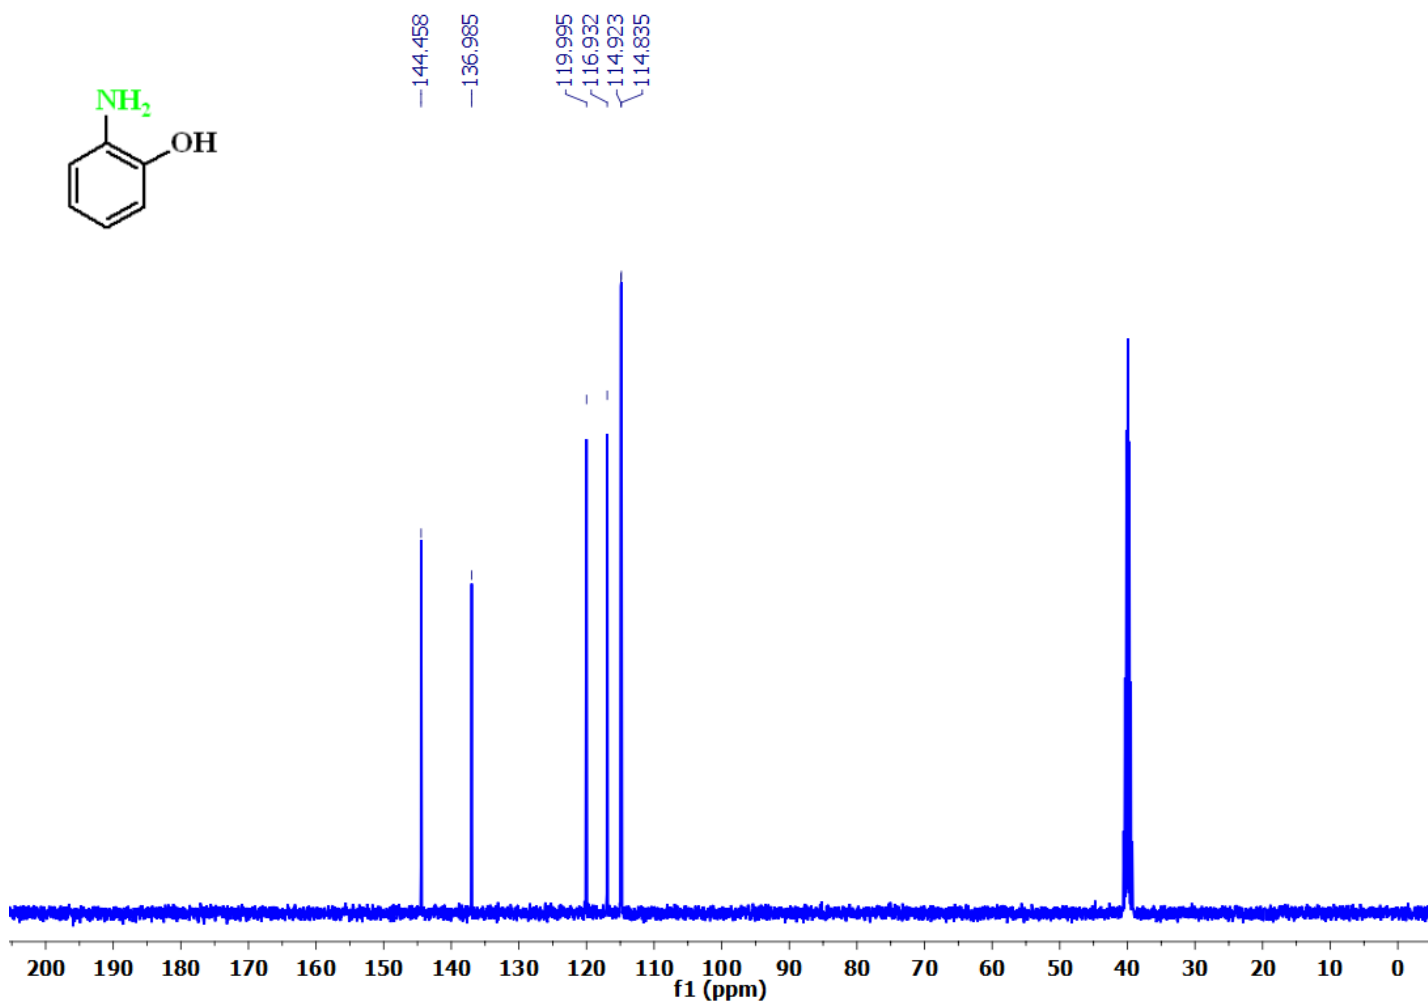

$^{13}\text{C}$  NMR of 2-Aminophenol

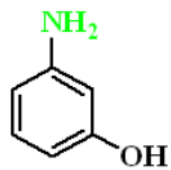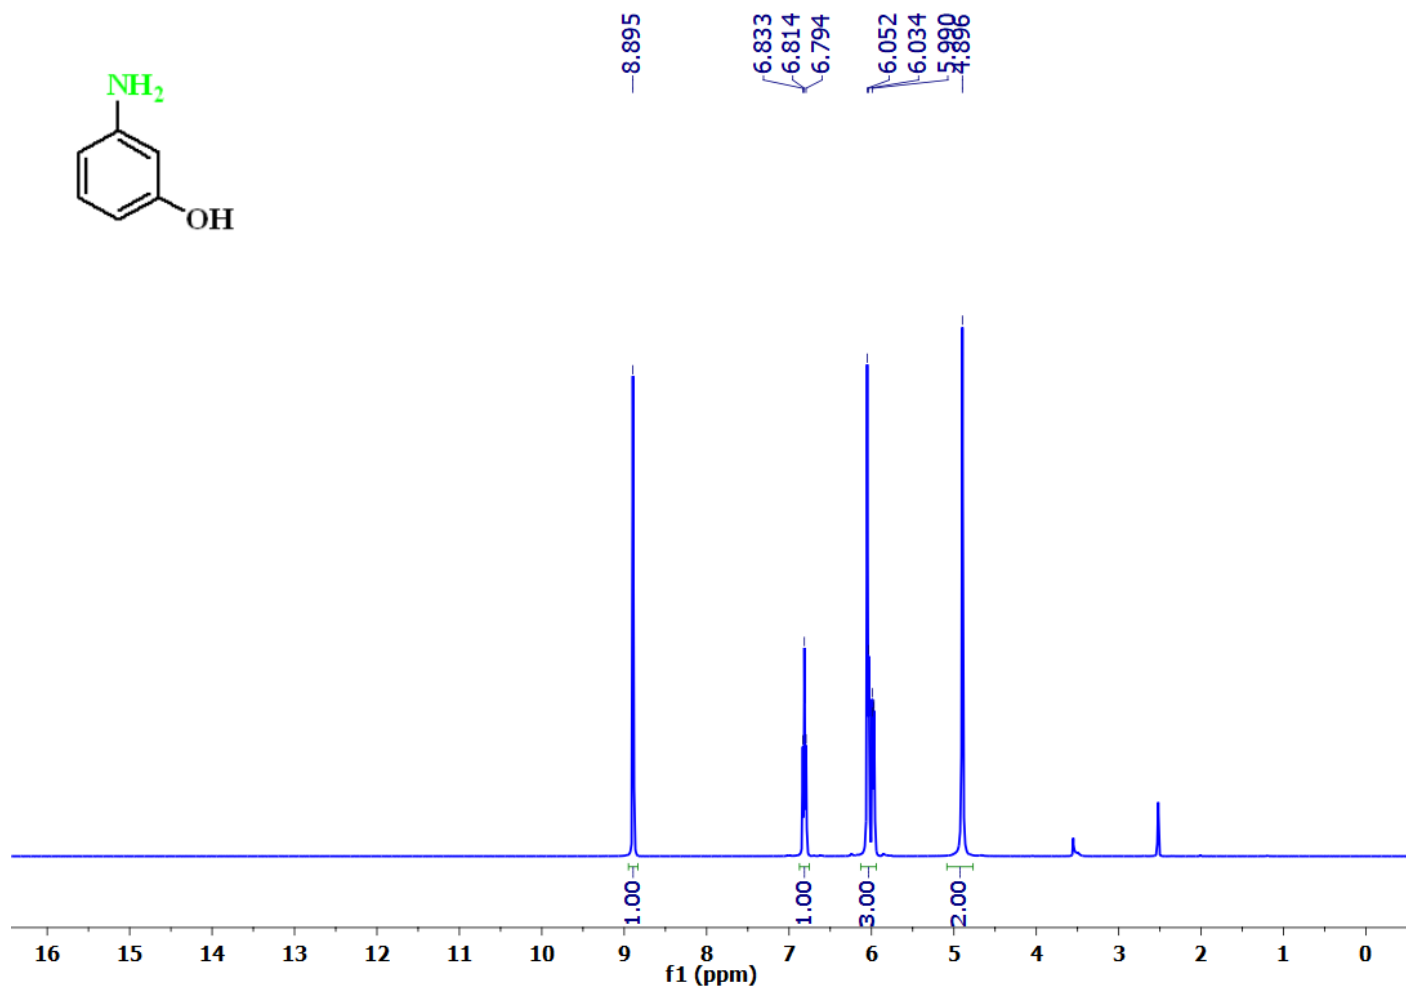

<sup>1</sup>H NMR of 3-Aminophenol

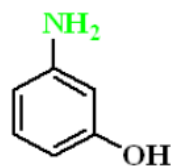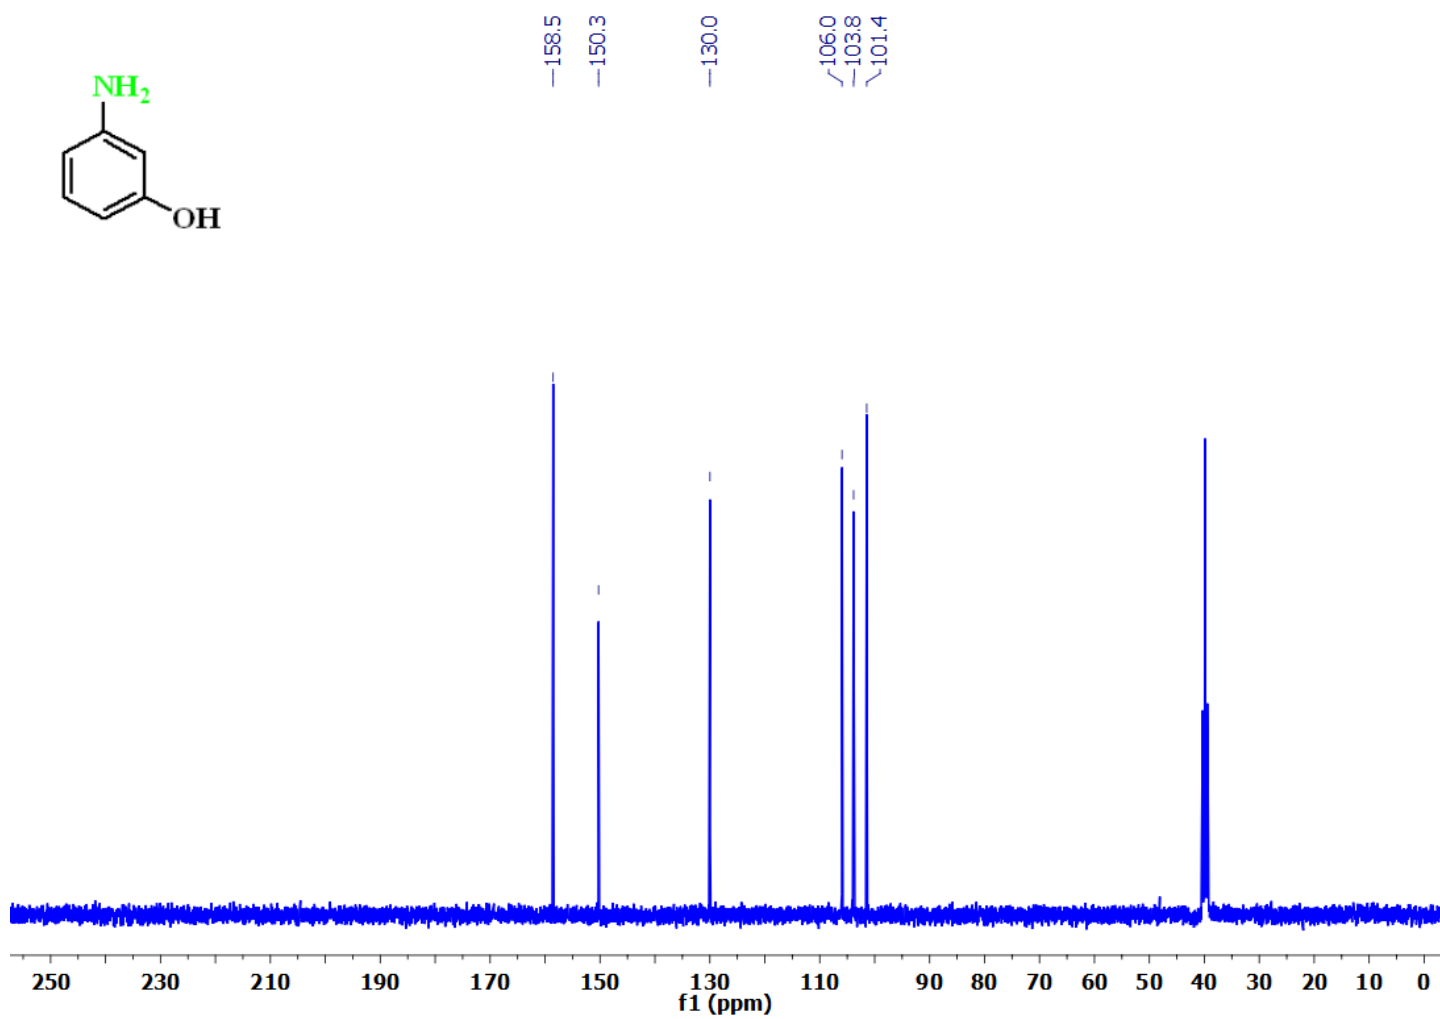

$^{13}\text{C}$  NMR of 3-Aminophenol

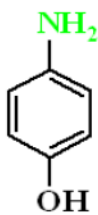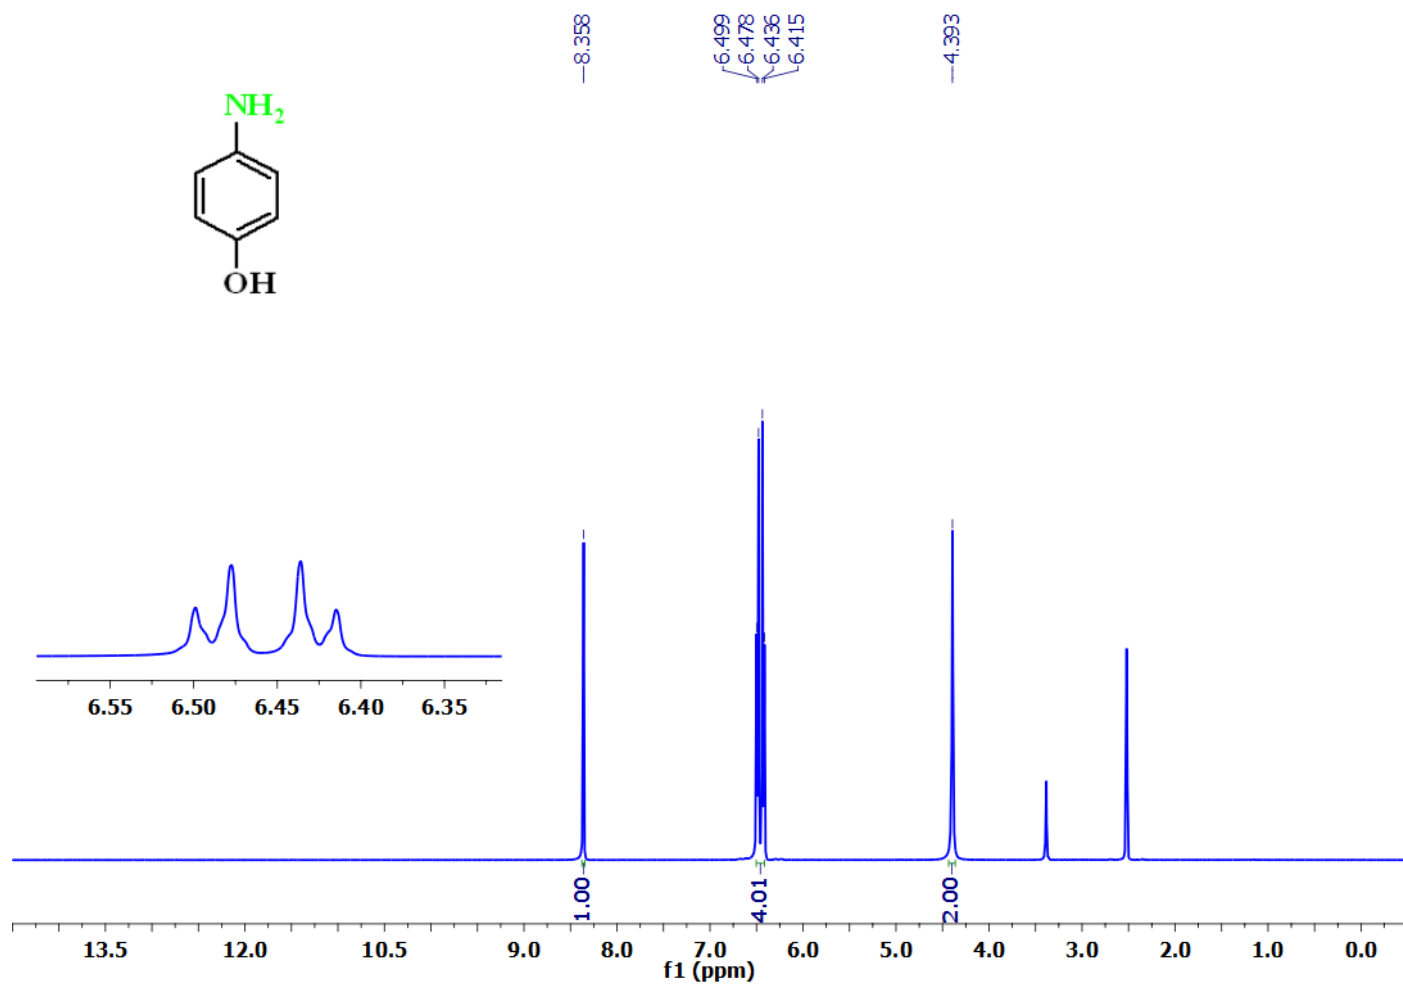

$^1\text{H}$  NMR of 4-Aminophenol

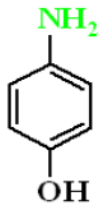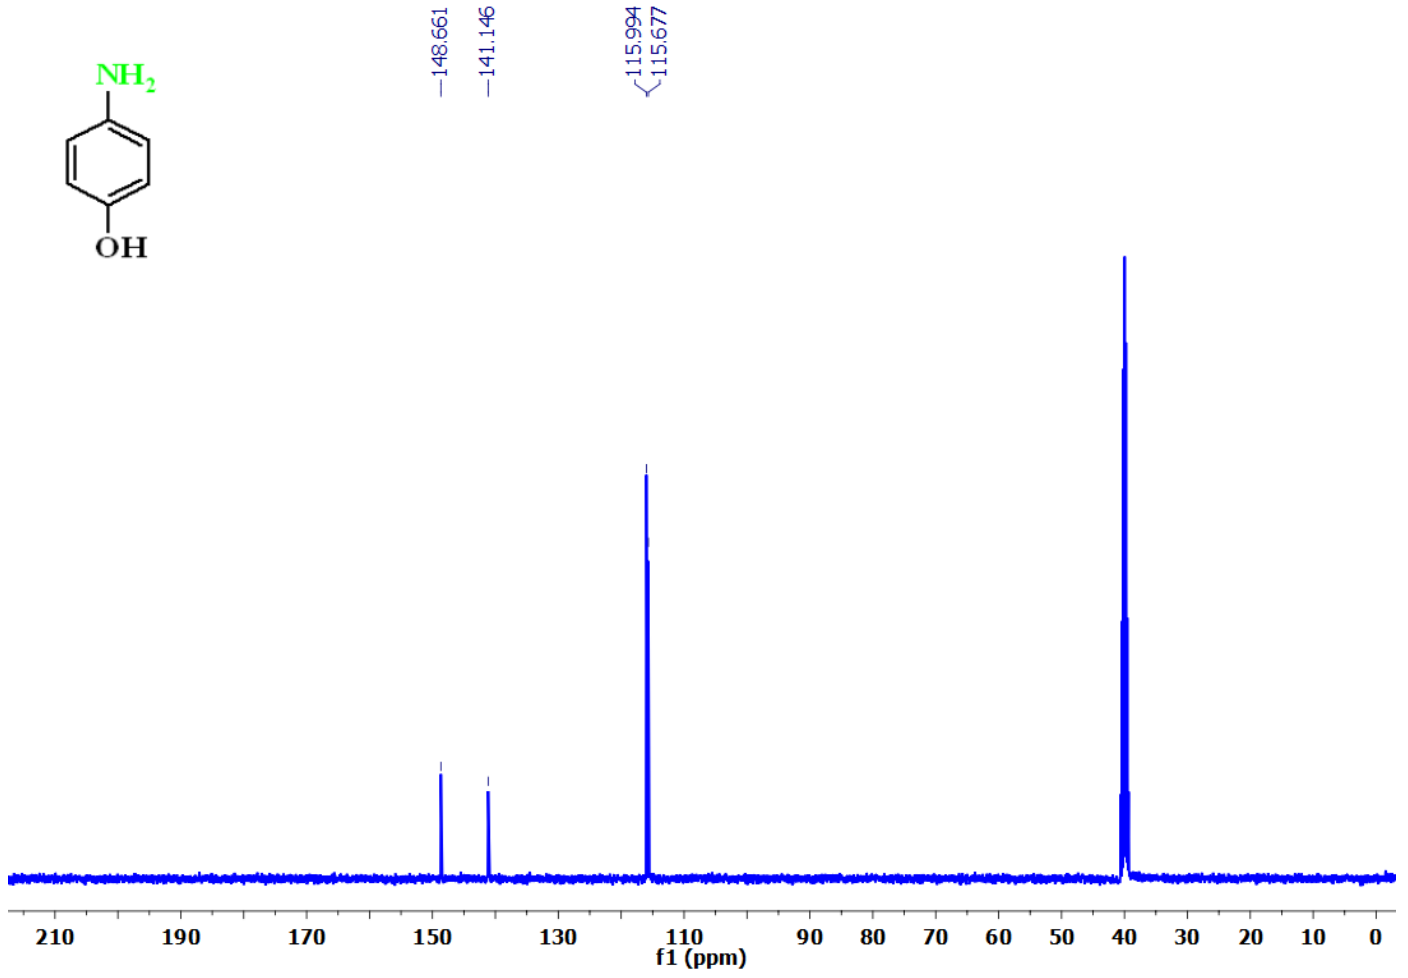

<sup>13</sup>C NMR of 4-Aminophenol

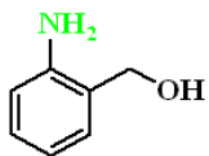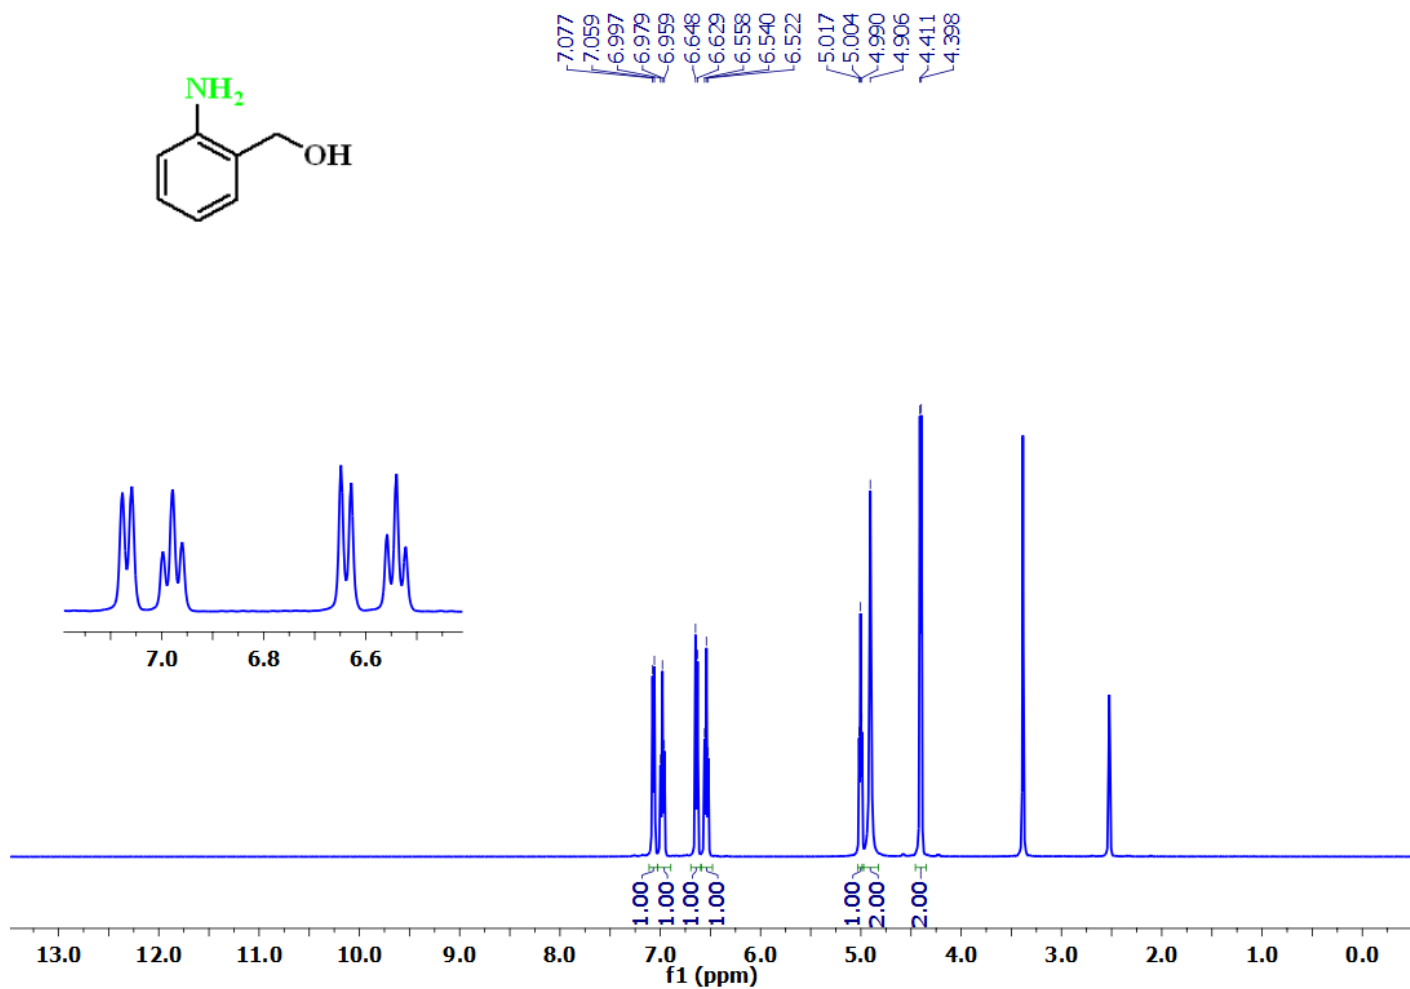

<sup>1</sup>H NMR of 2-Aminobenzyl alcohol

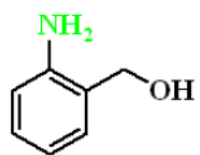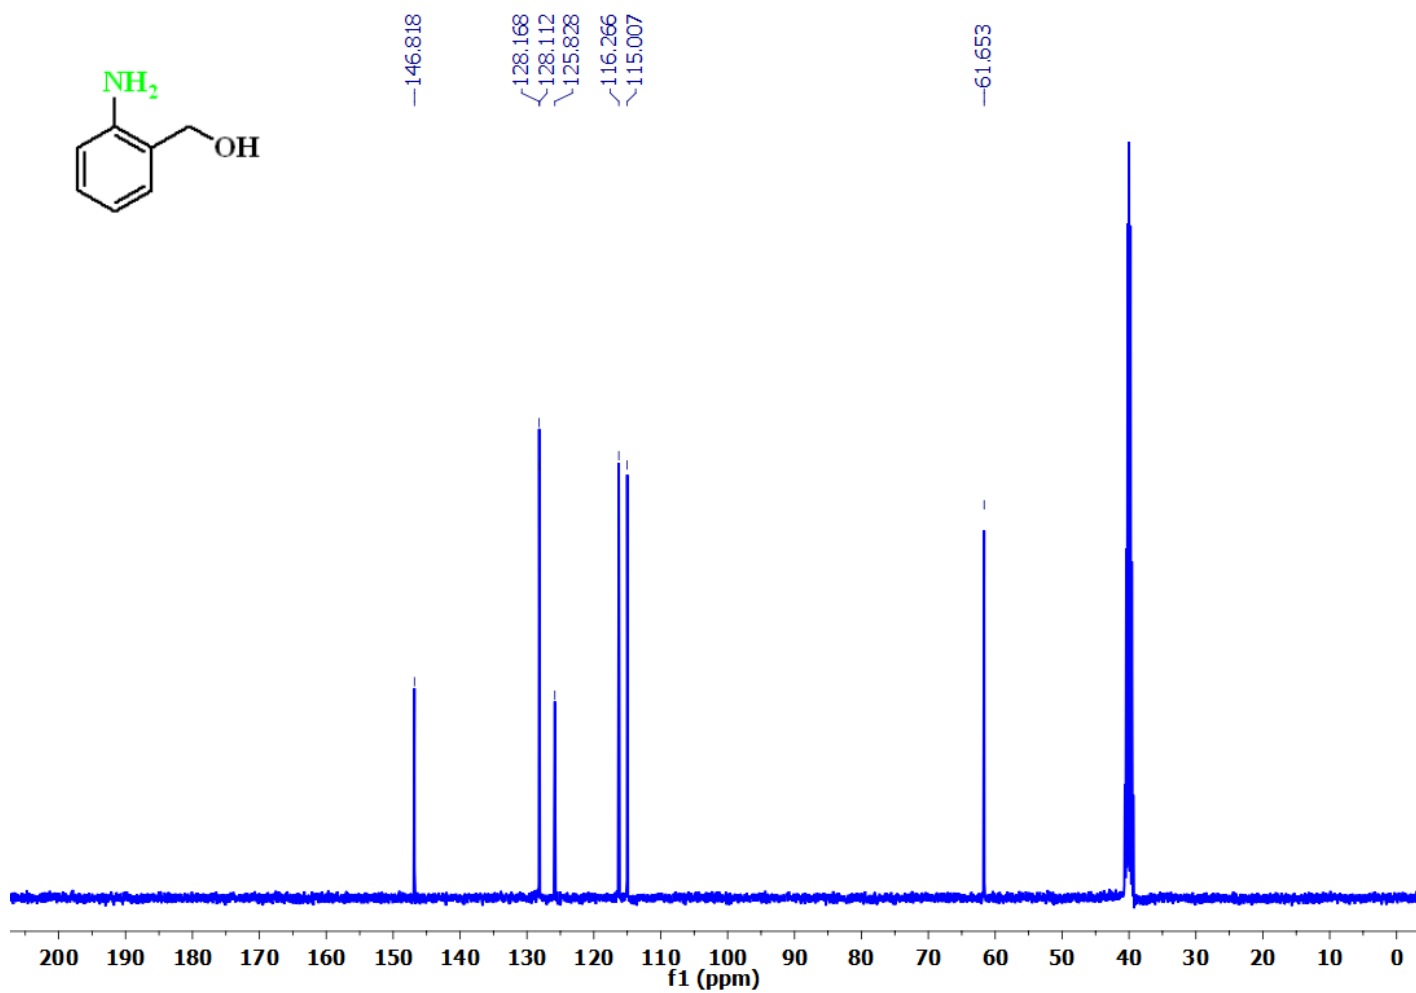

$^{13}\text{C}$  NMR of 2-Aminobenzyl alcohol



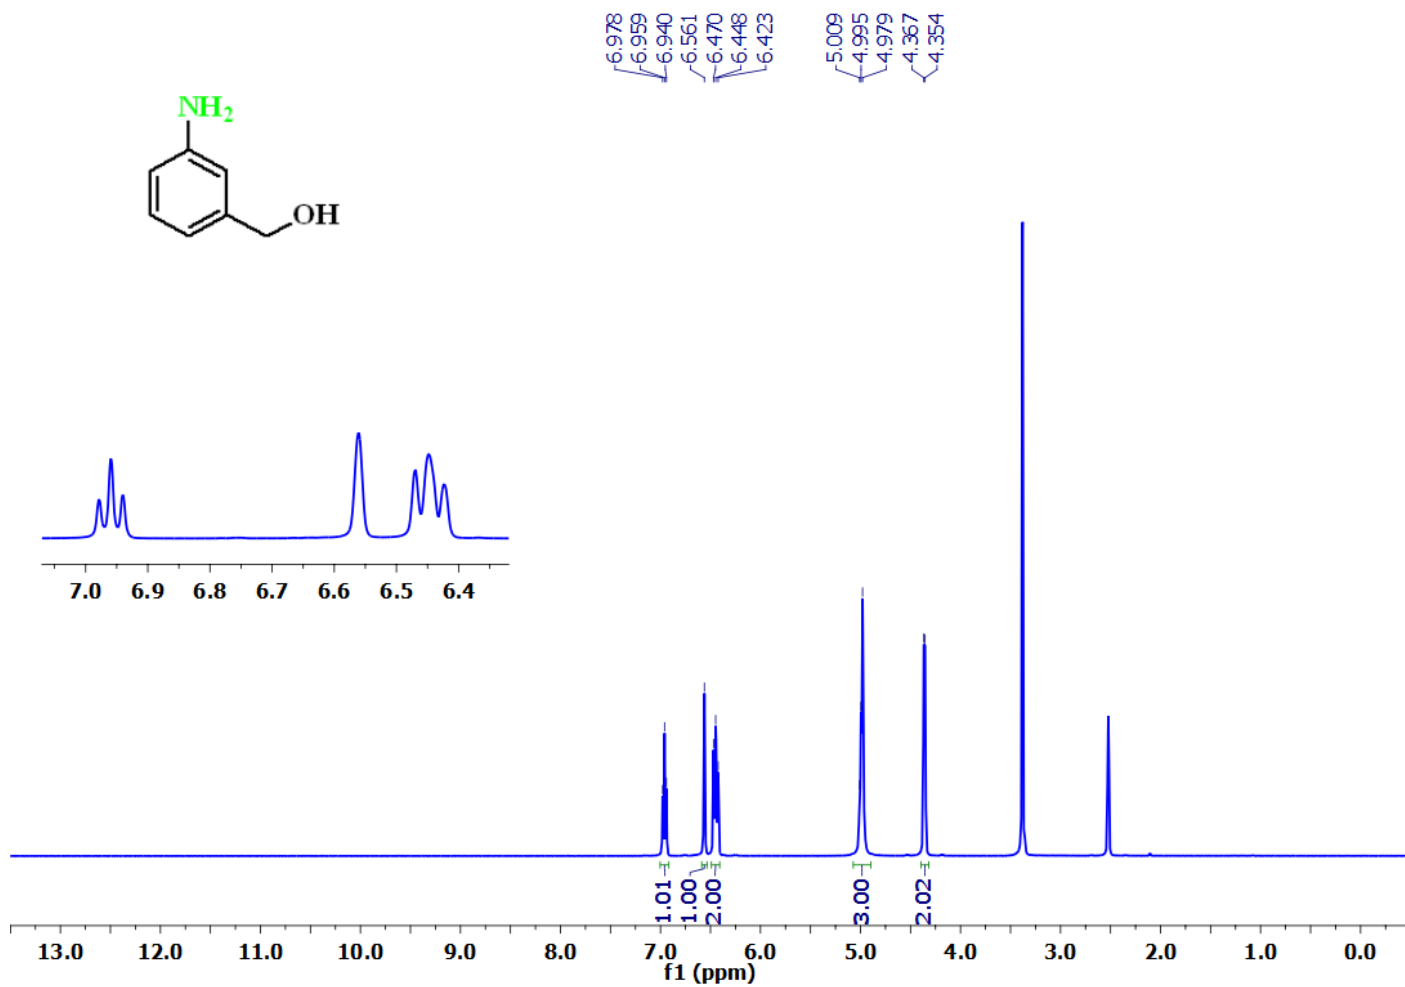

<sup>1</sup>H NMR of 3-Aminobenzyl alcohol

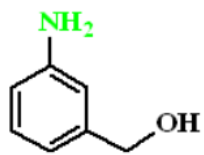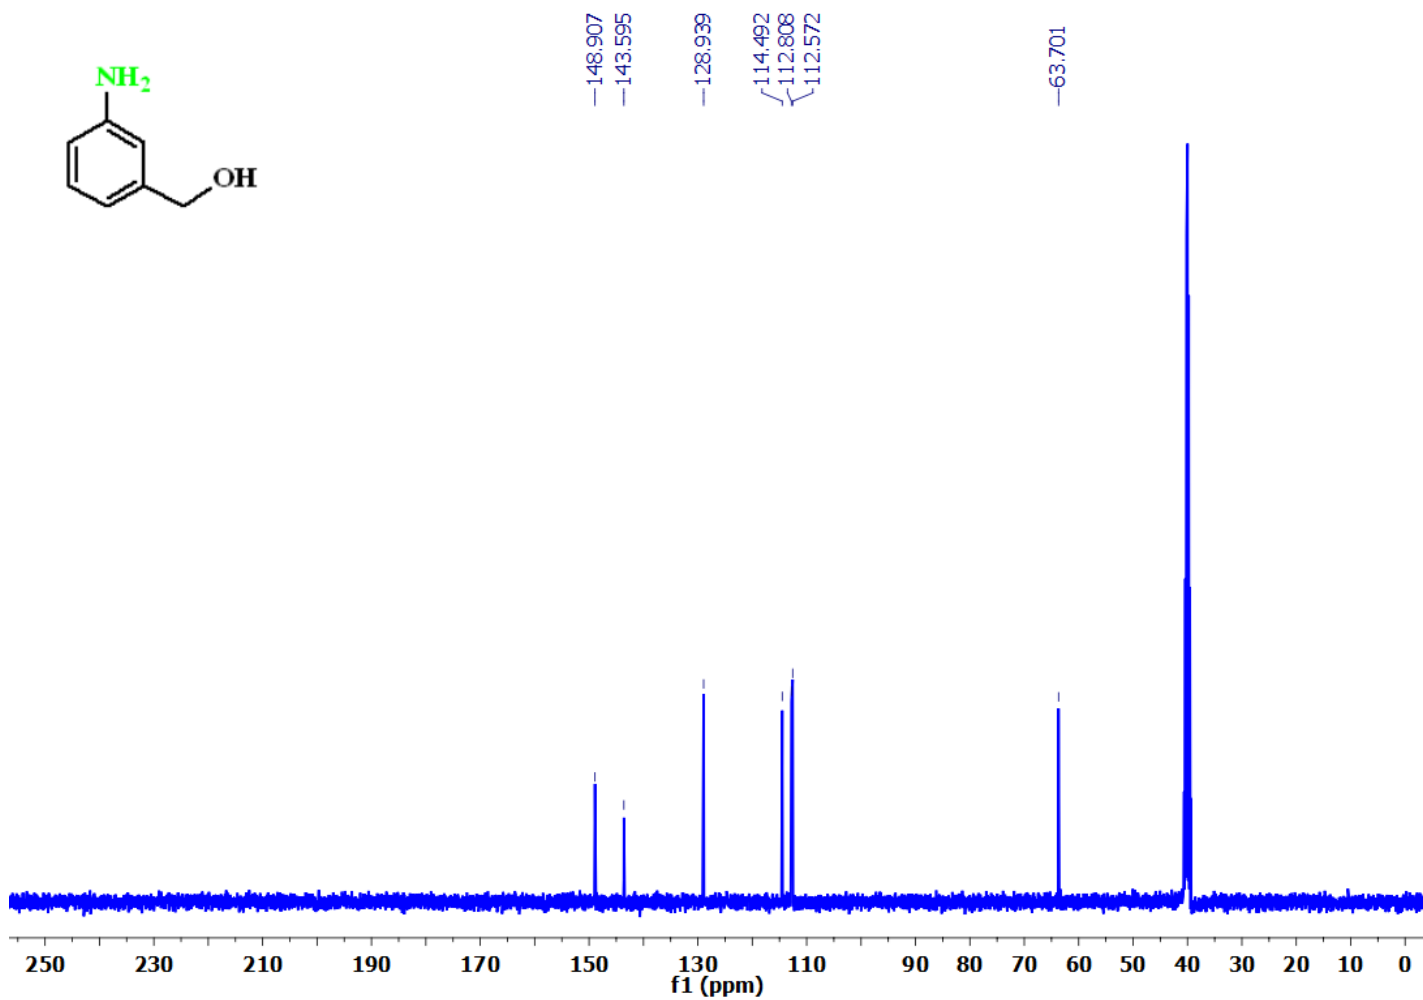

<sup>13</sup>C NMR of 3-Aminobenzyl alcohol

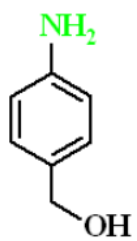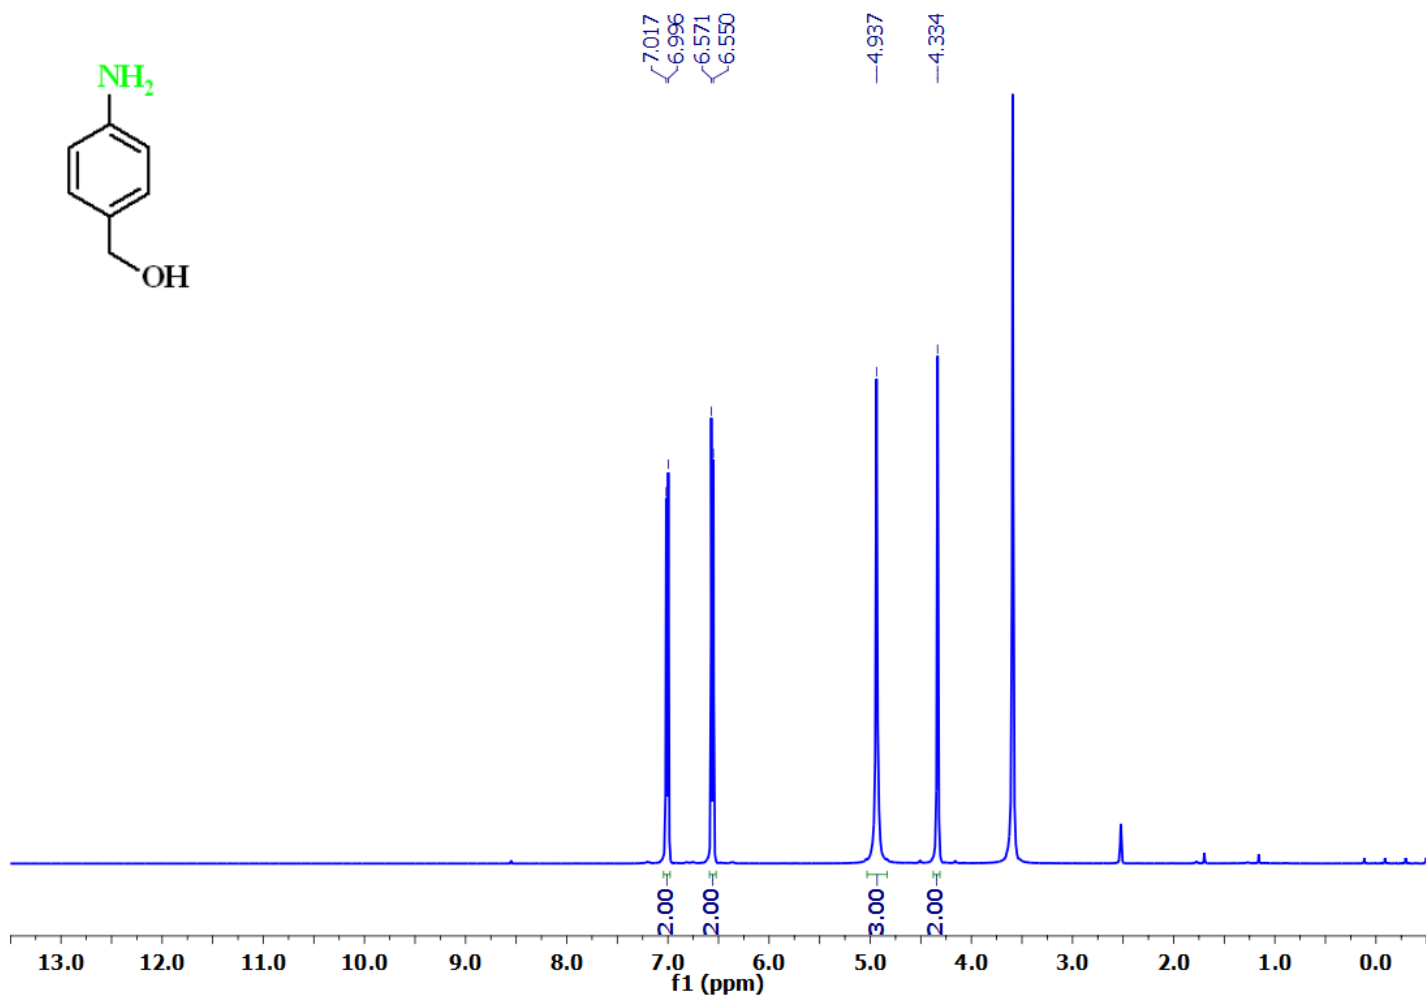

$^1\text{H}$  NMR of 4-Aminobenzyl alcohol

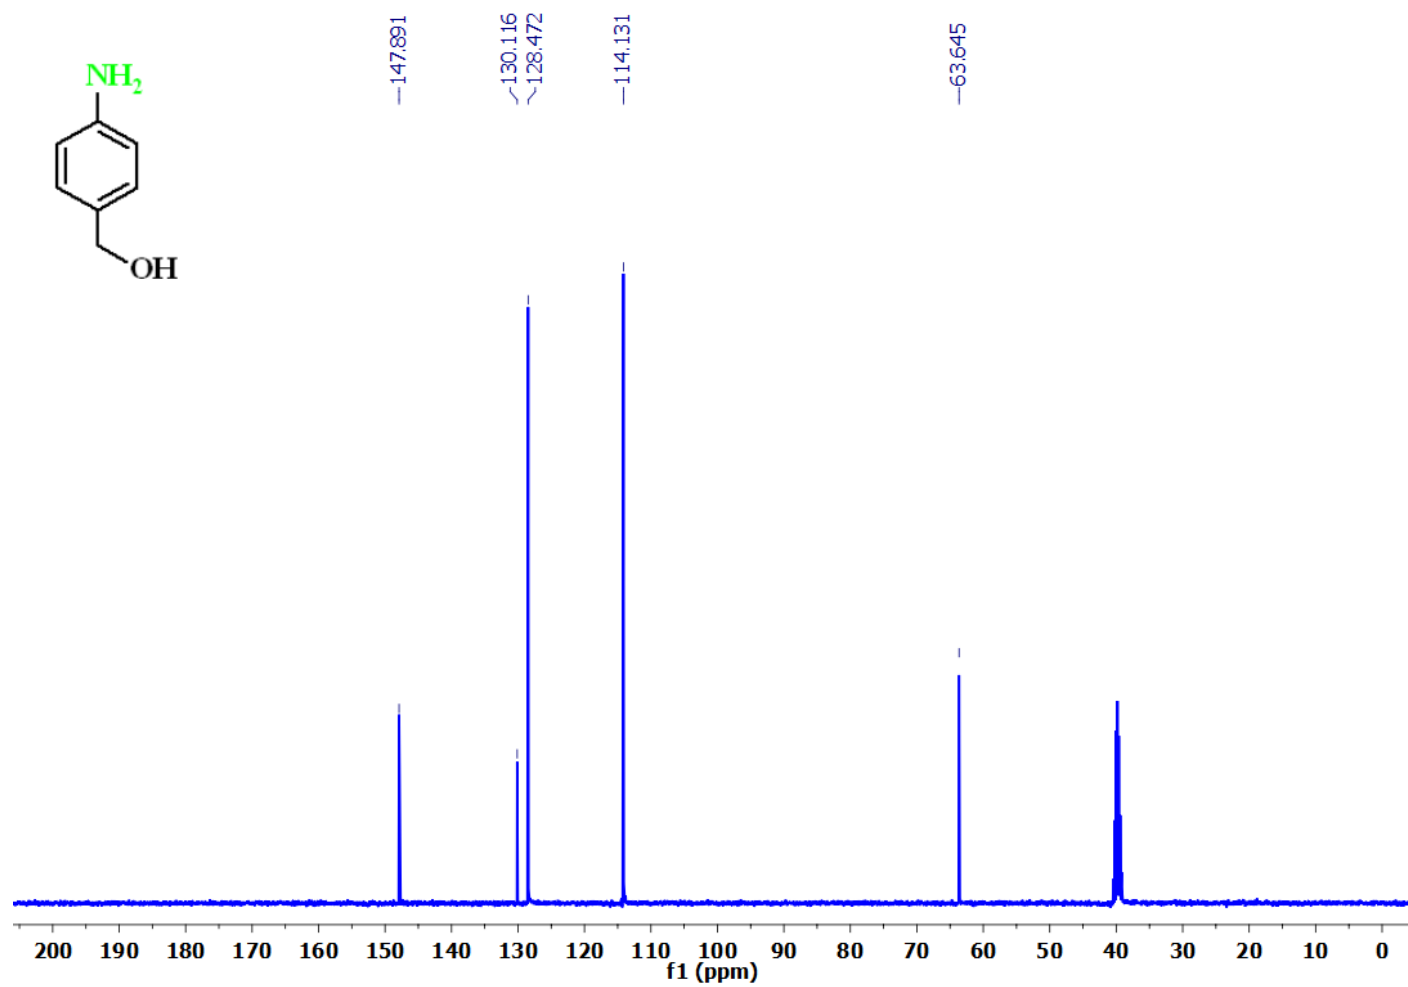

<sup>13</sup>C NMR of 4-Aminobenzyl alcohol

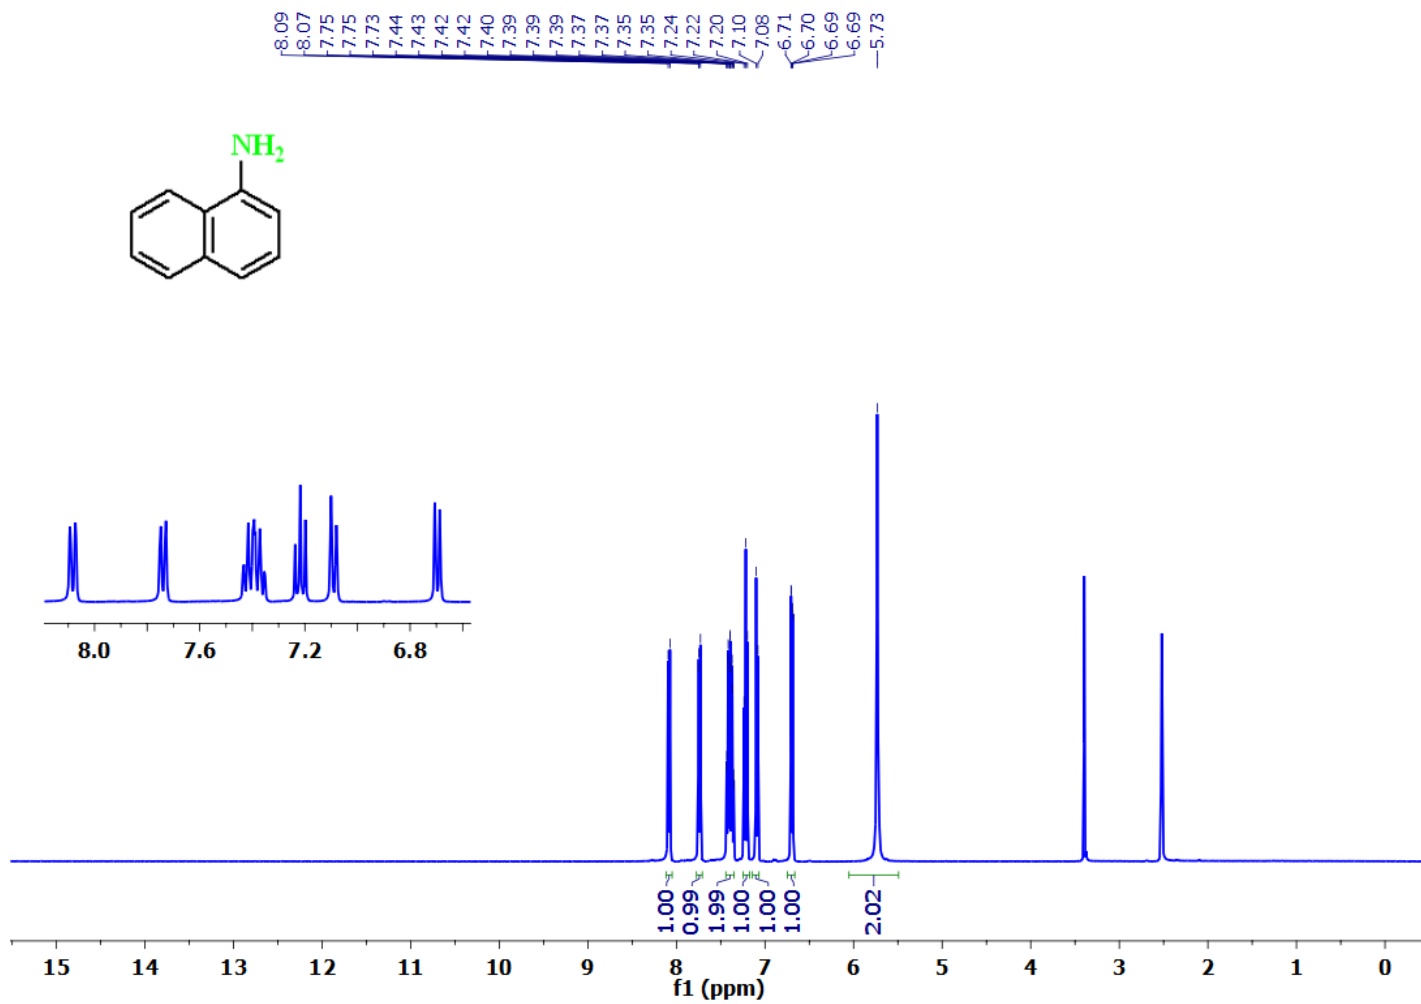

<sup>1</sup>H NMR of Naphthalen-1-amine

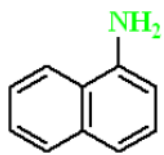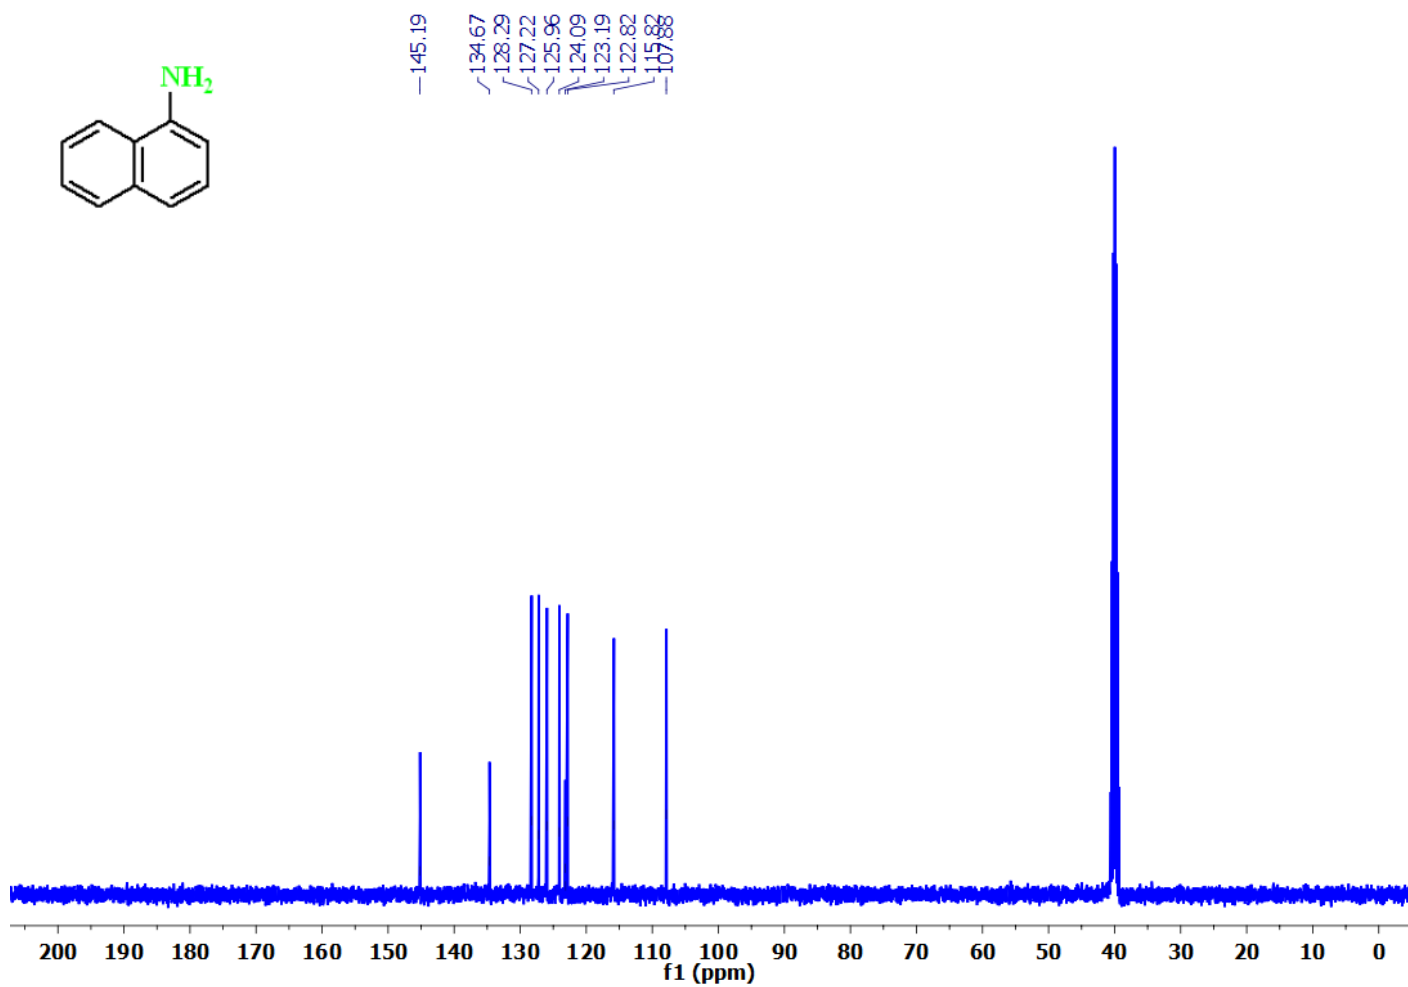

$^{13}\text{C}$  NMR of Naphthalen-1-amine

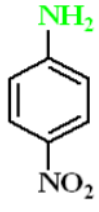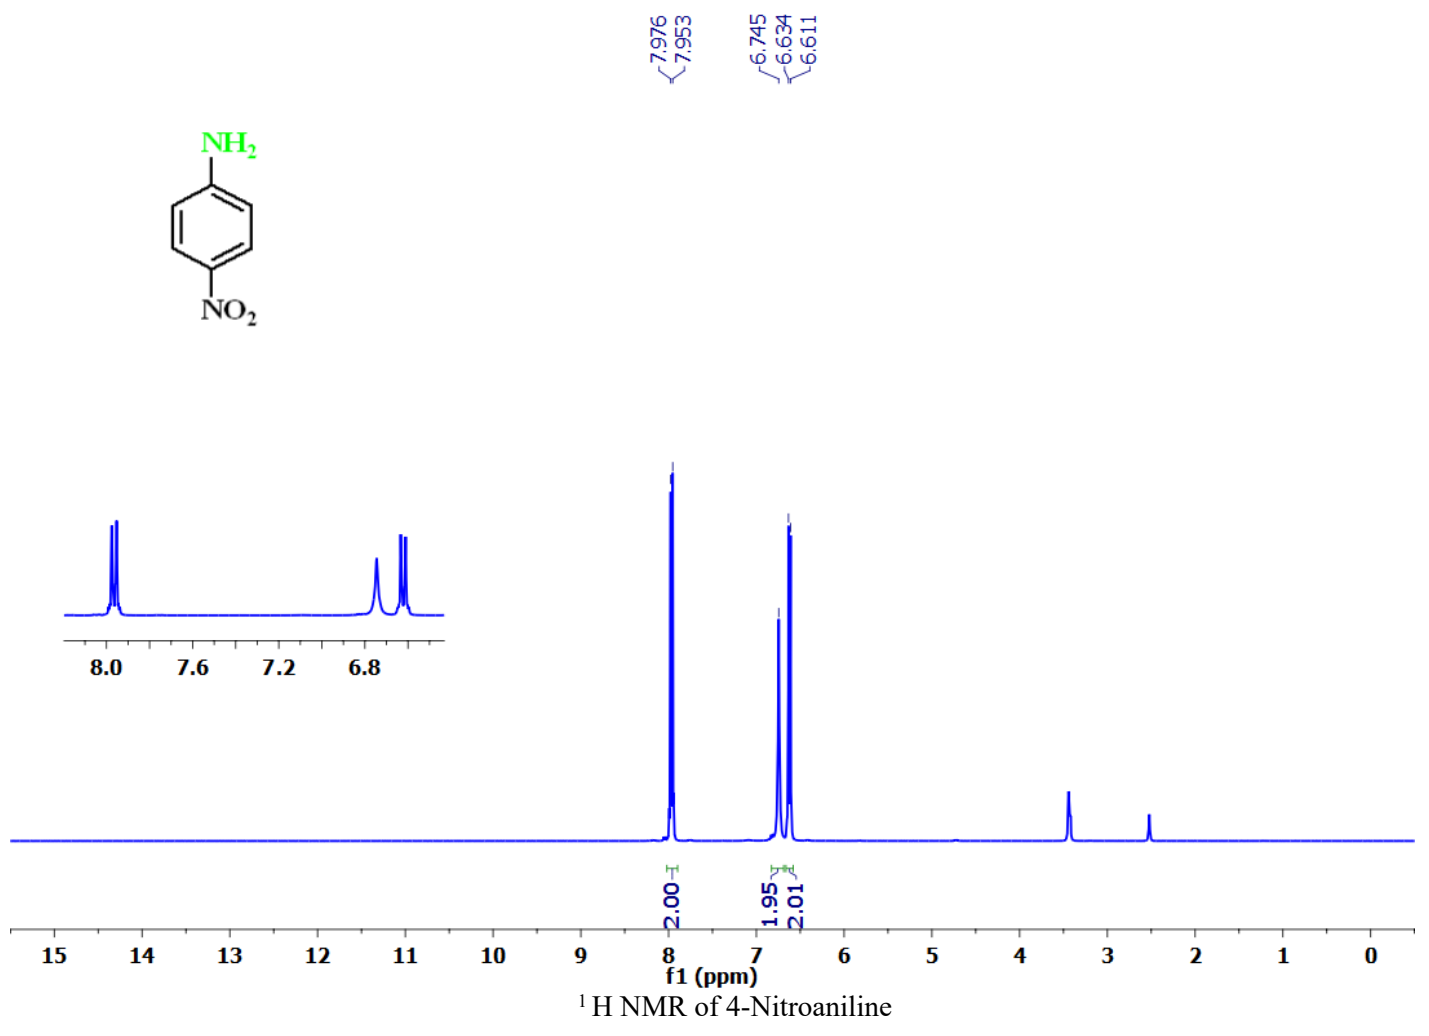

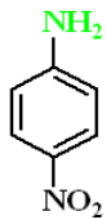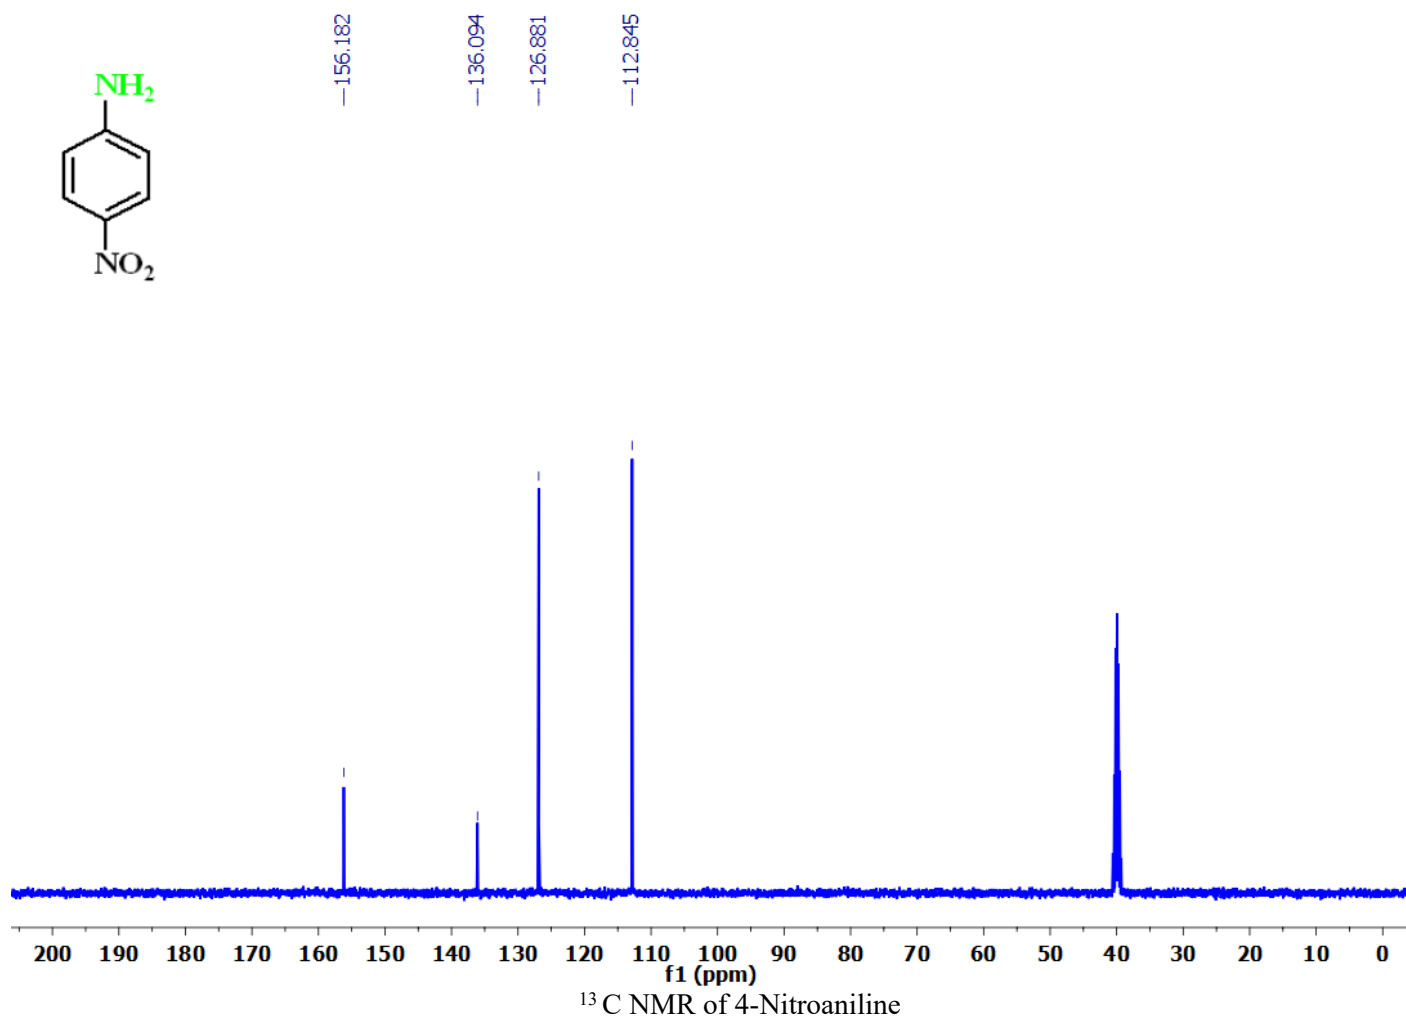



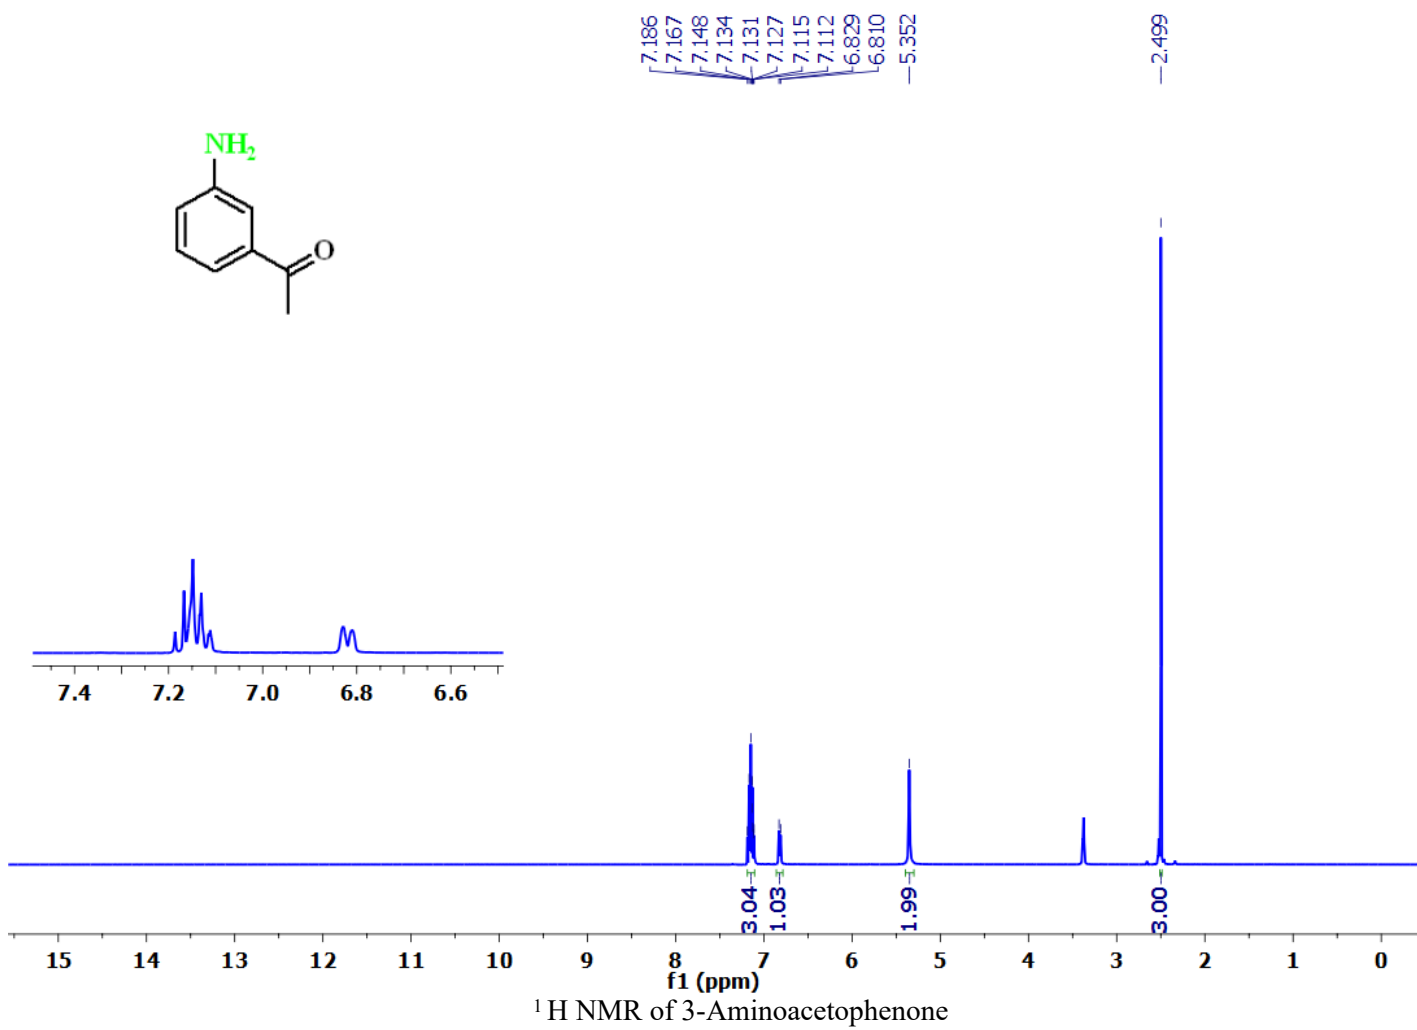

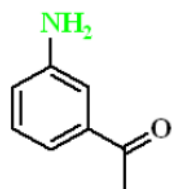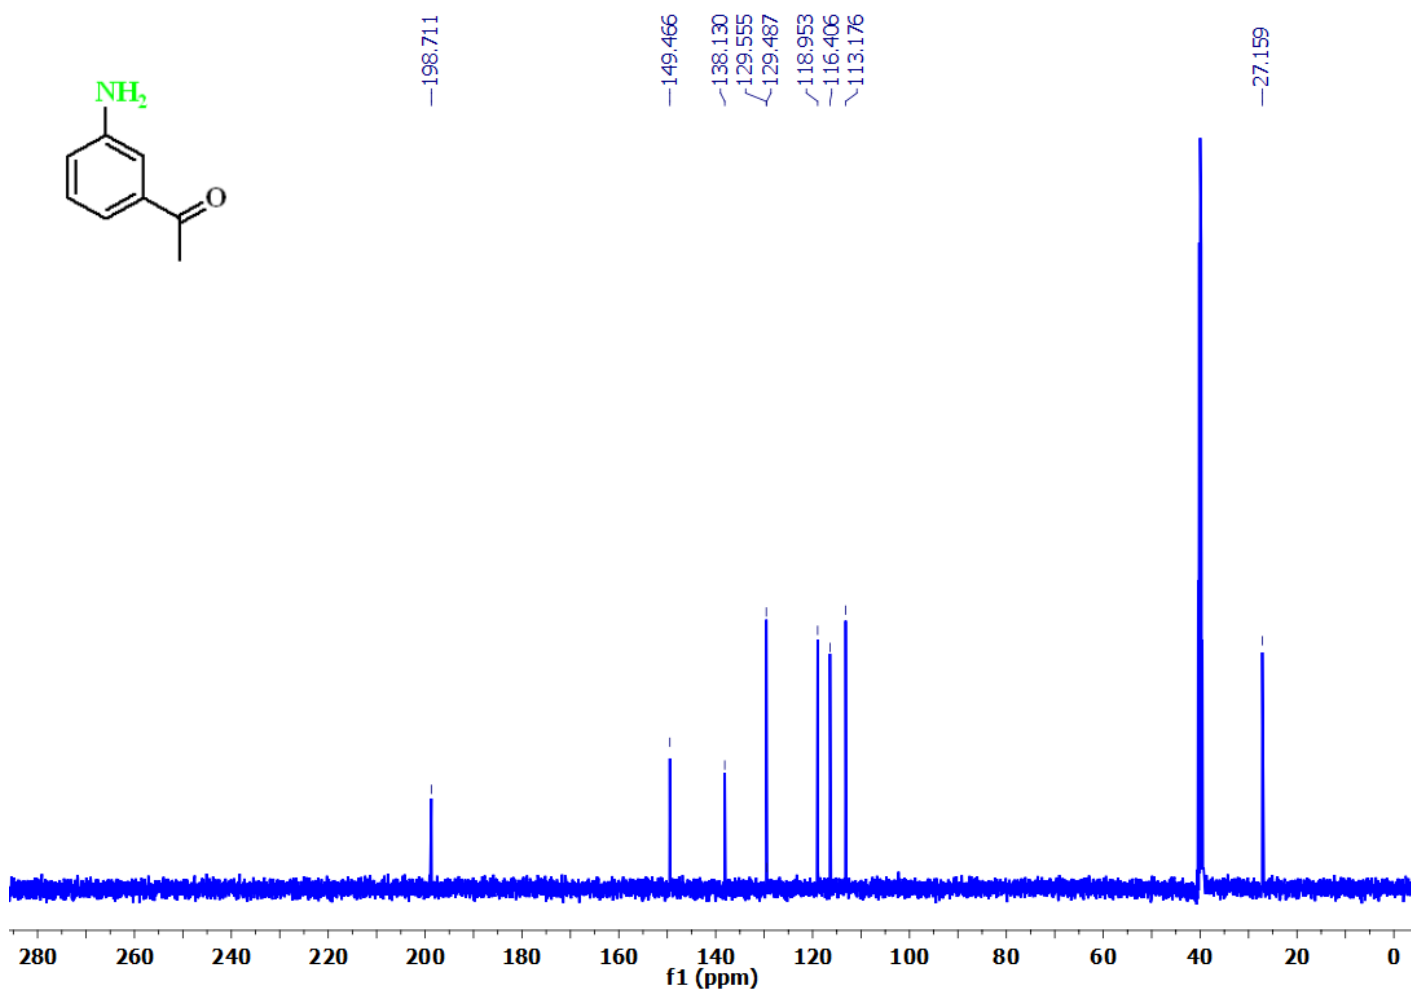

<sup>13</sup>C NMR of 3-Aminoacetophenone

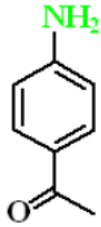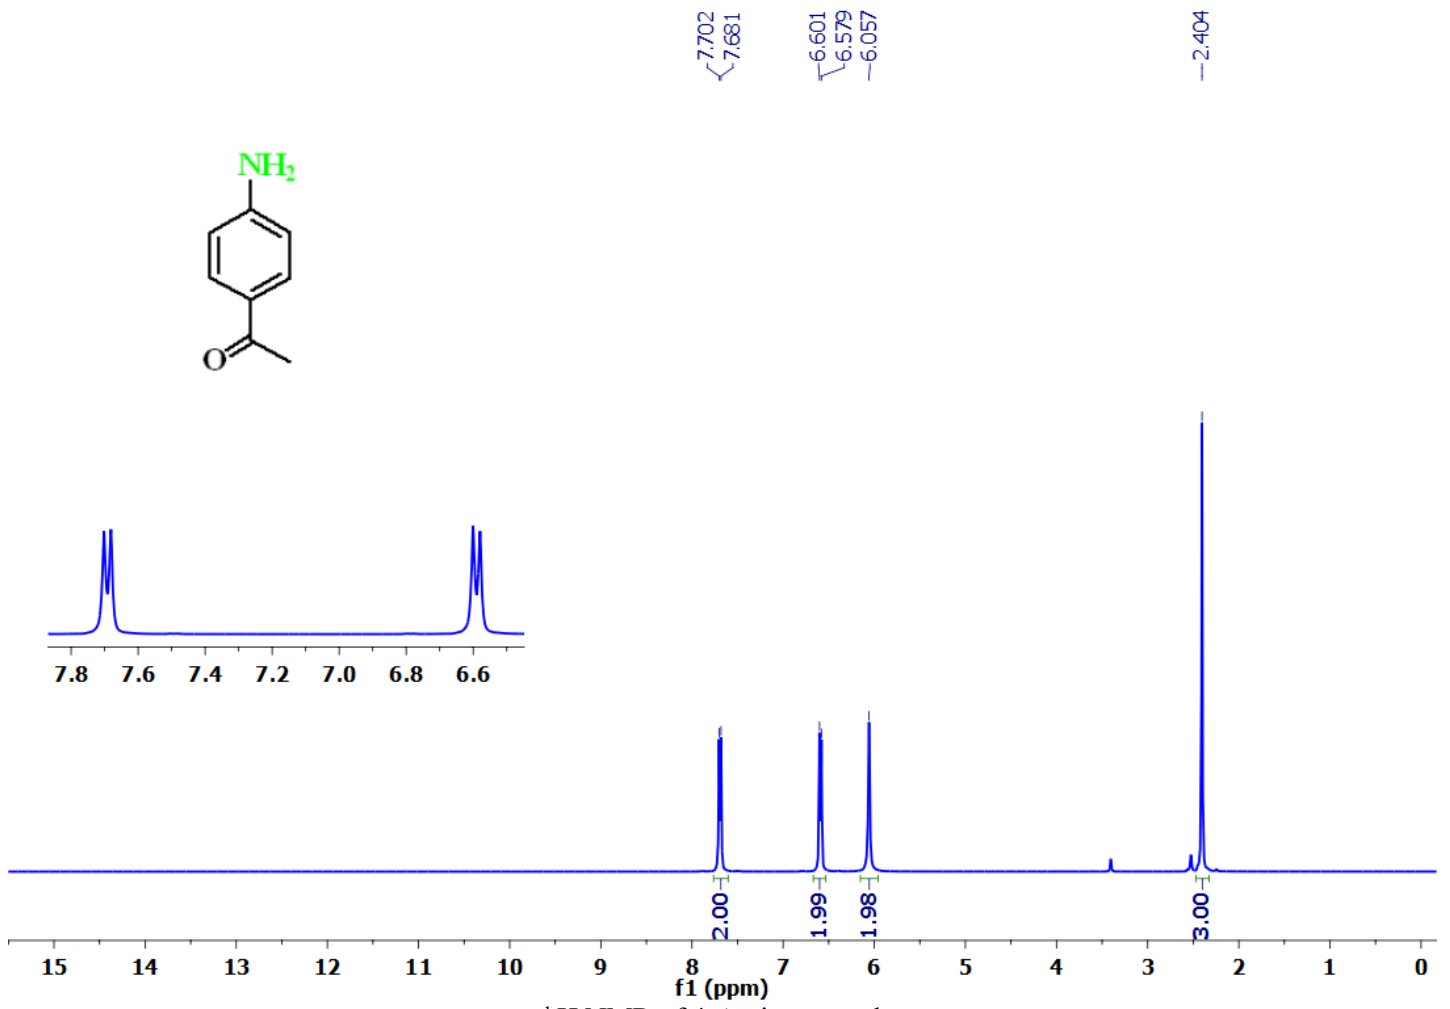

<sup>1</sup>H NMR of 4-Aminoacetophenone

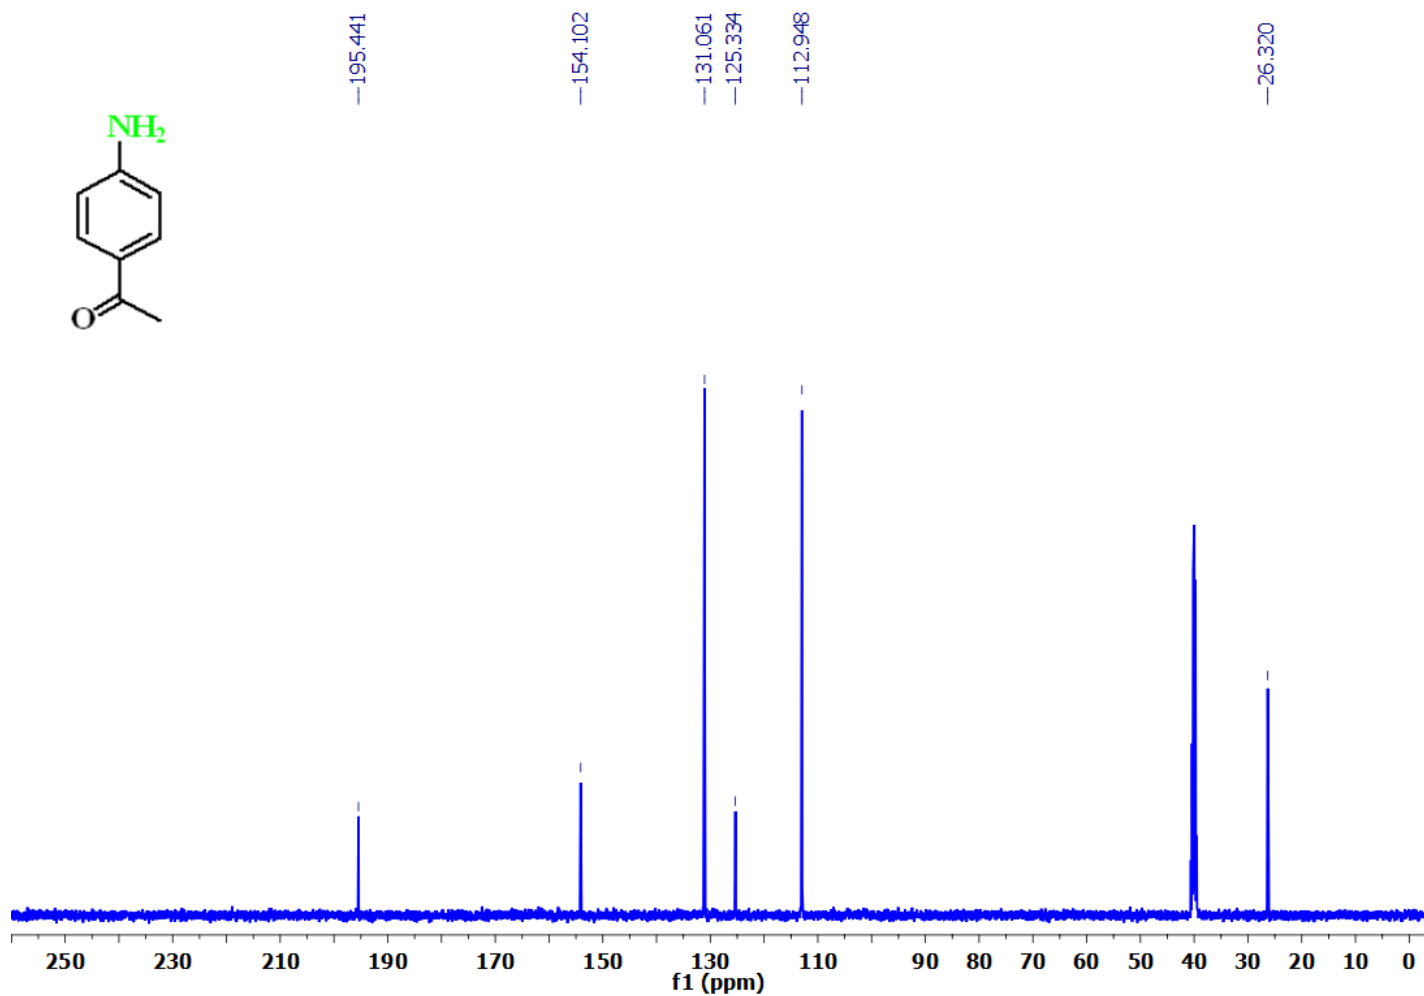

$^{13}\text{C}$  NMR of 3-Aminoacetophenone

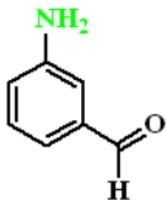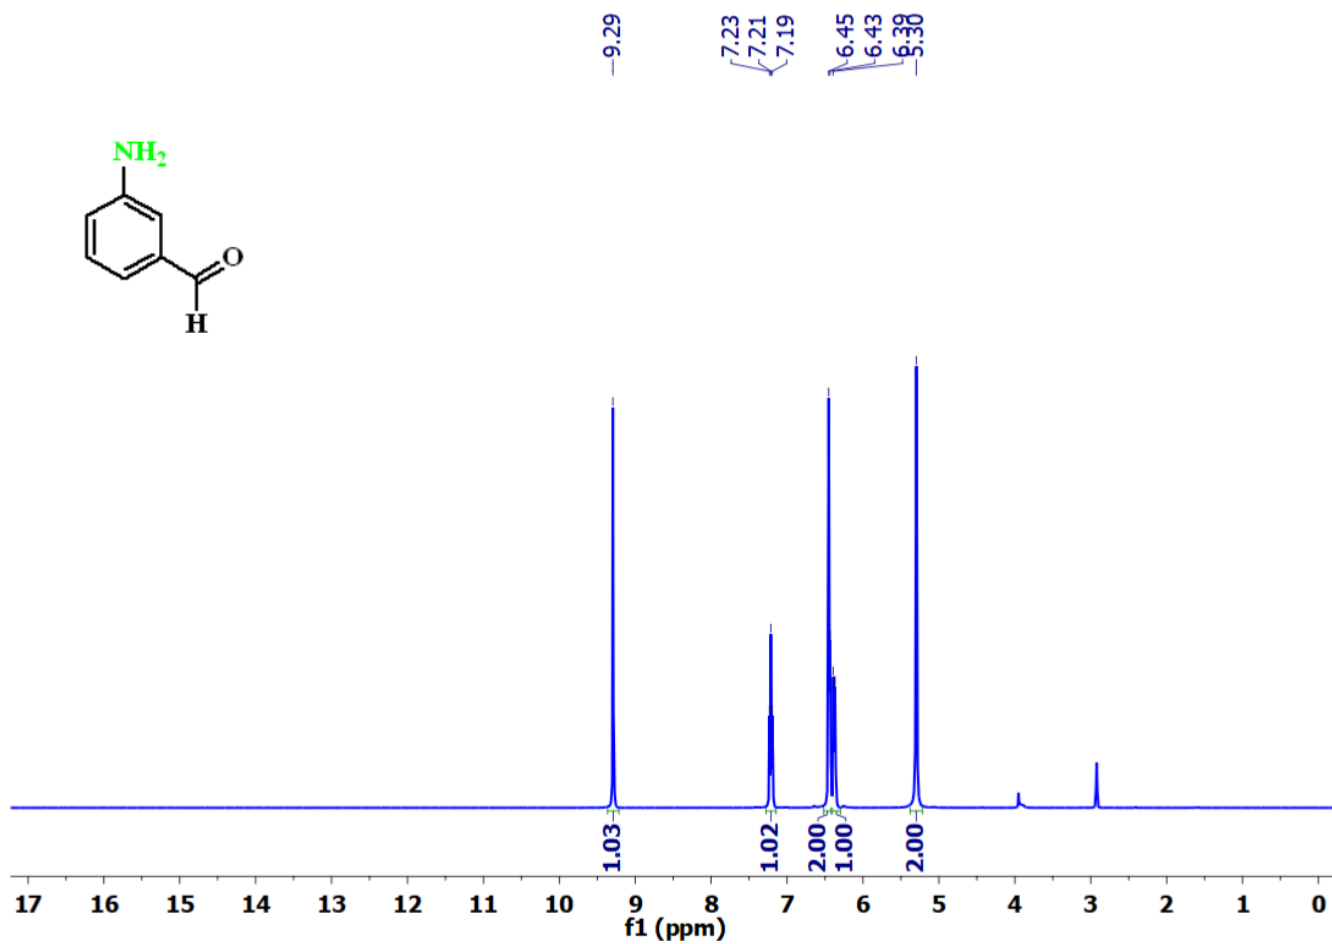

<sup>1</sup>H NMR of 3-Aminobenzaldehyde

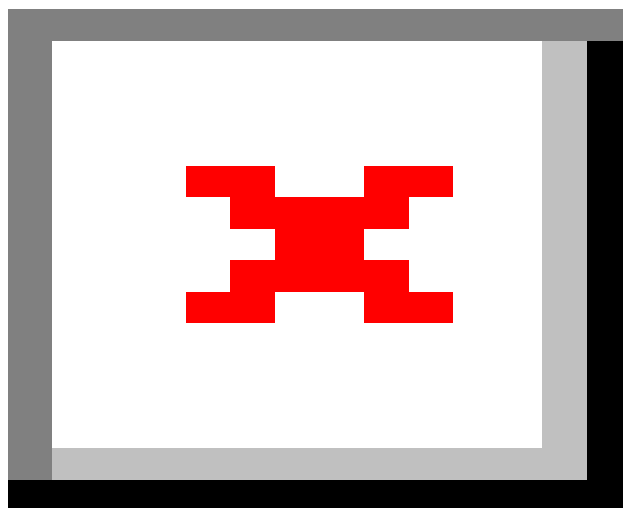

<sup>13</sup>C NMR of 3-Aminobenzaldehyde

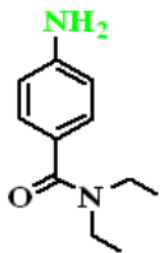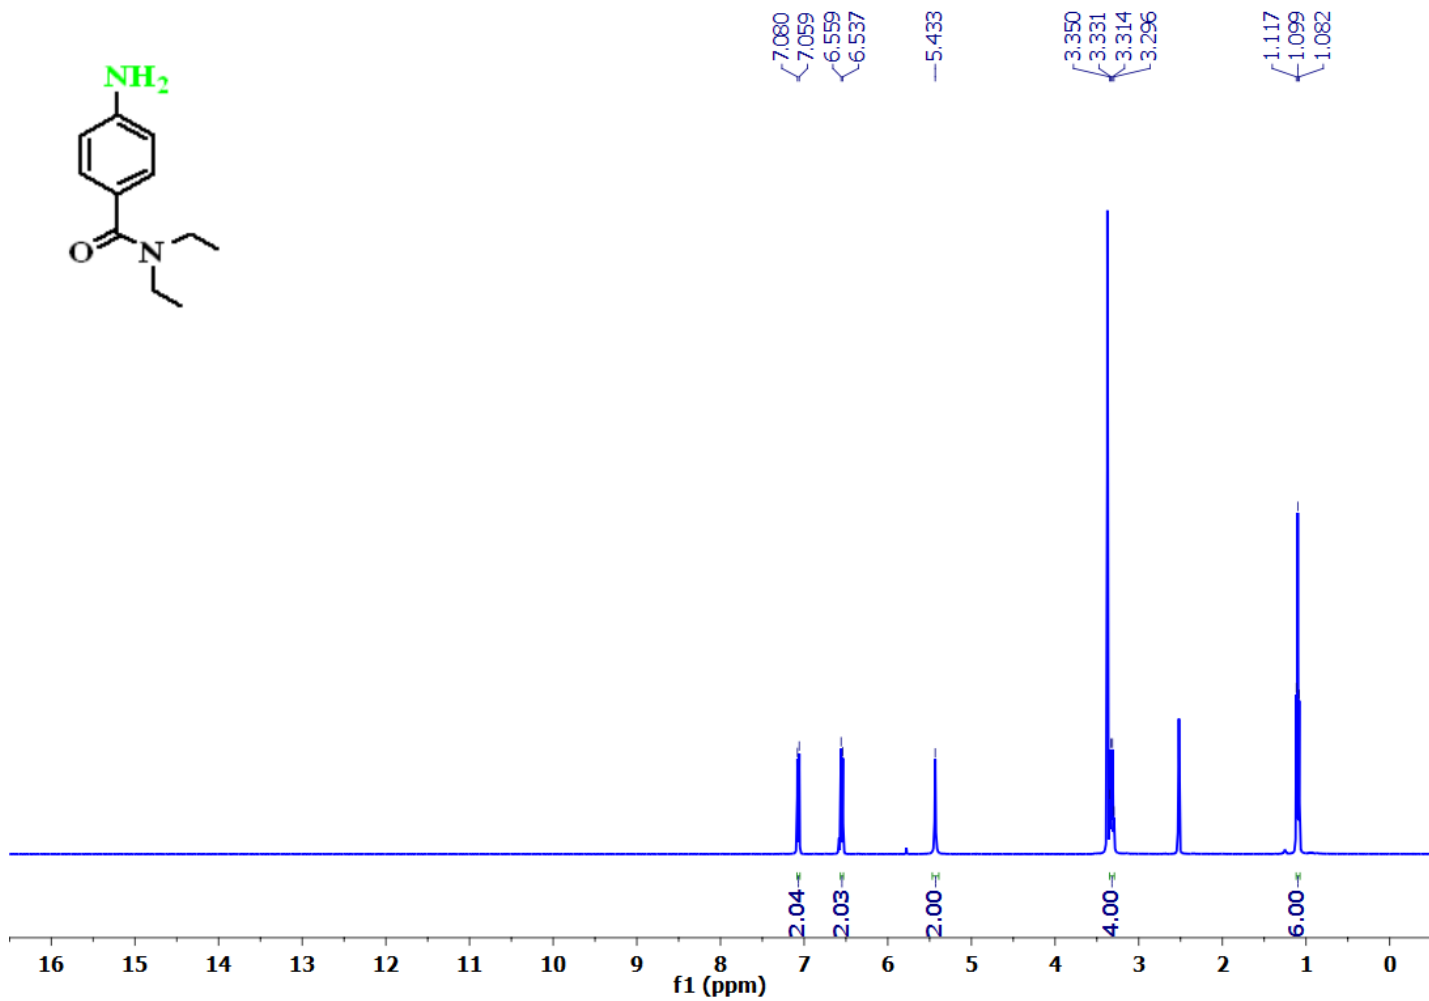

<sup>1</sup>H NMR of 4-Amino-N,N-diethylbenzamide

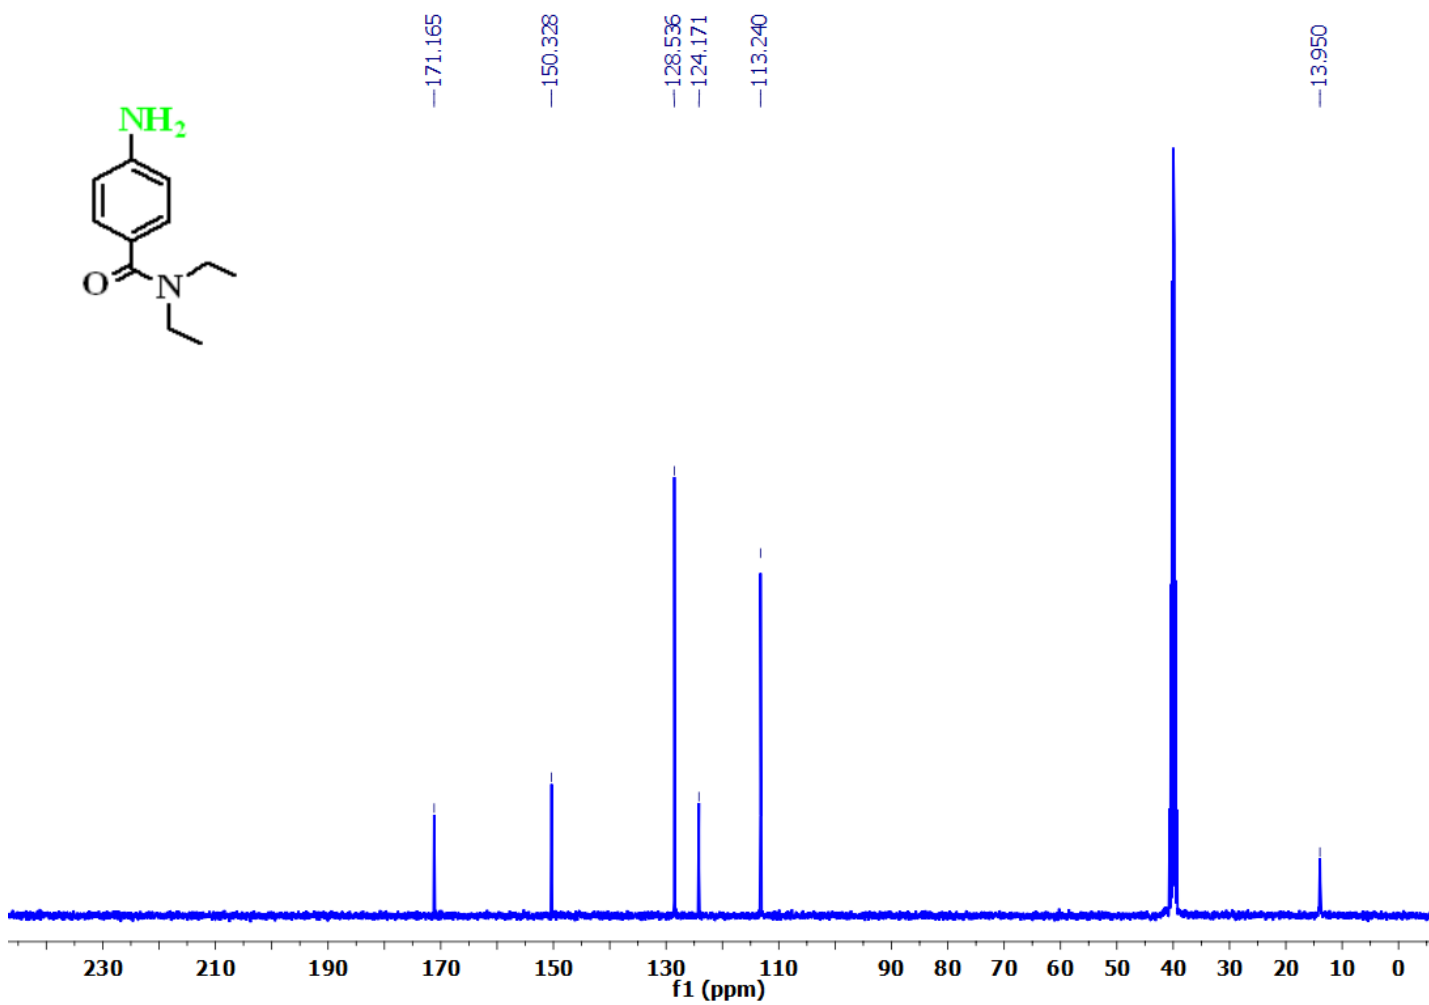

<sup>13</sup>C NMR of 4-Amino-*N,N*-diethylbenzamide



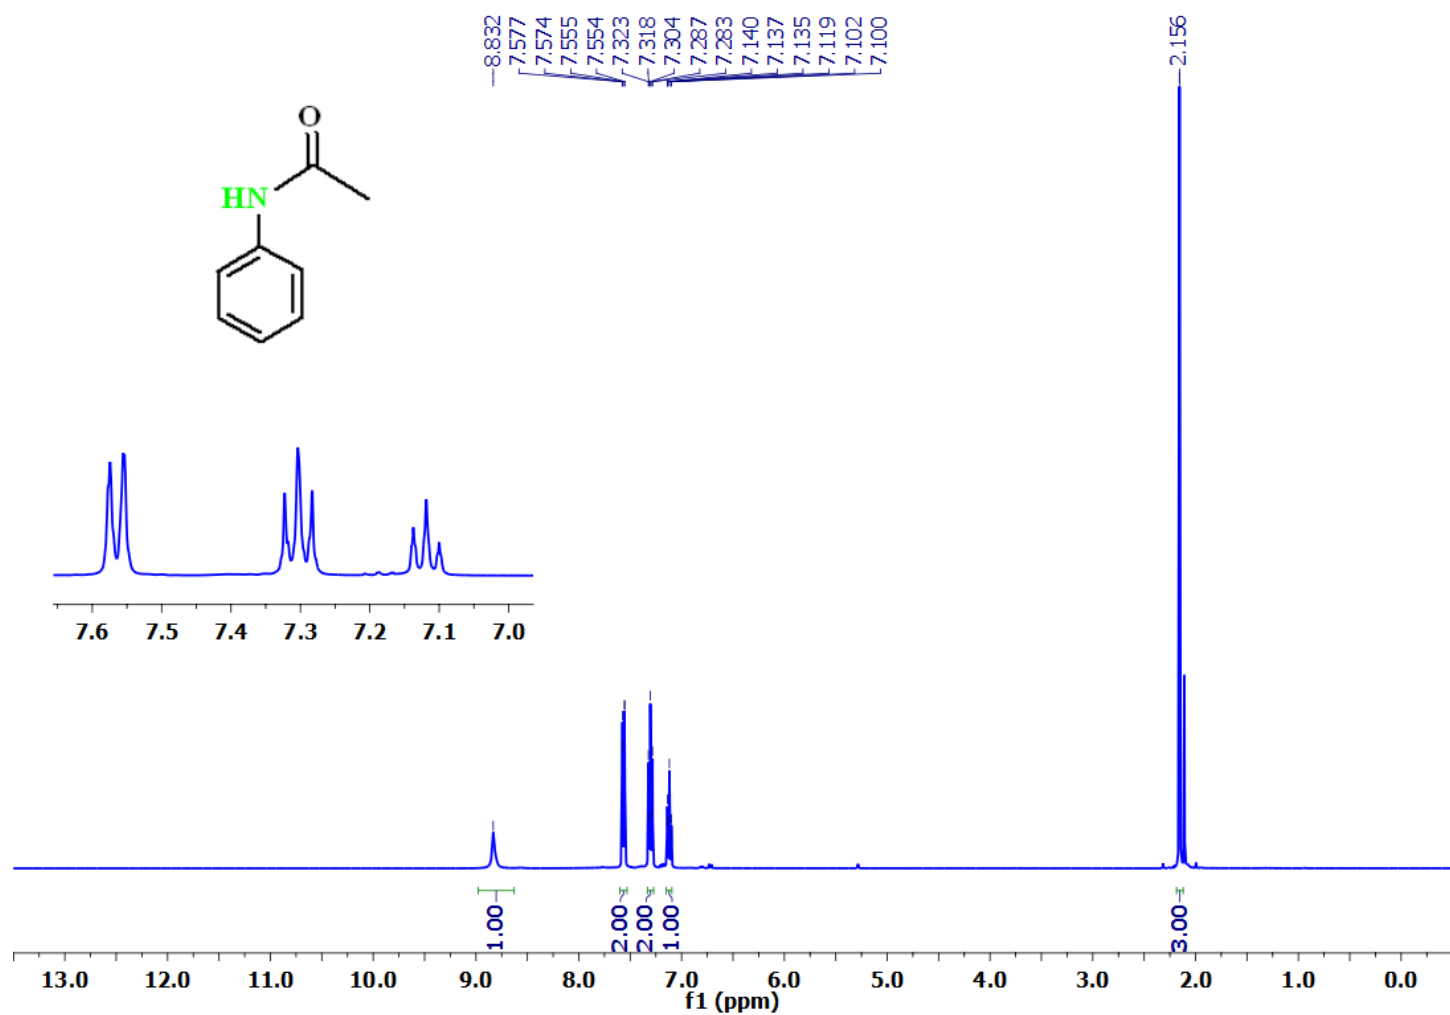

<sup>1</sup>H NMR of *N*-phenylacetamide

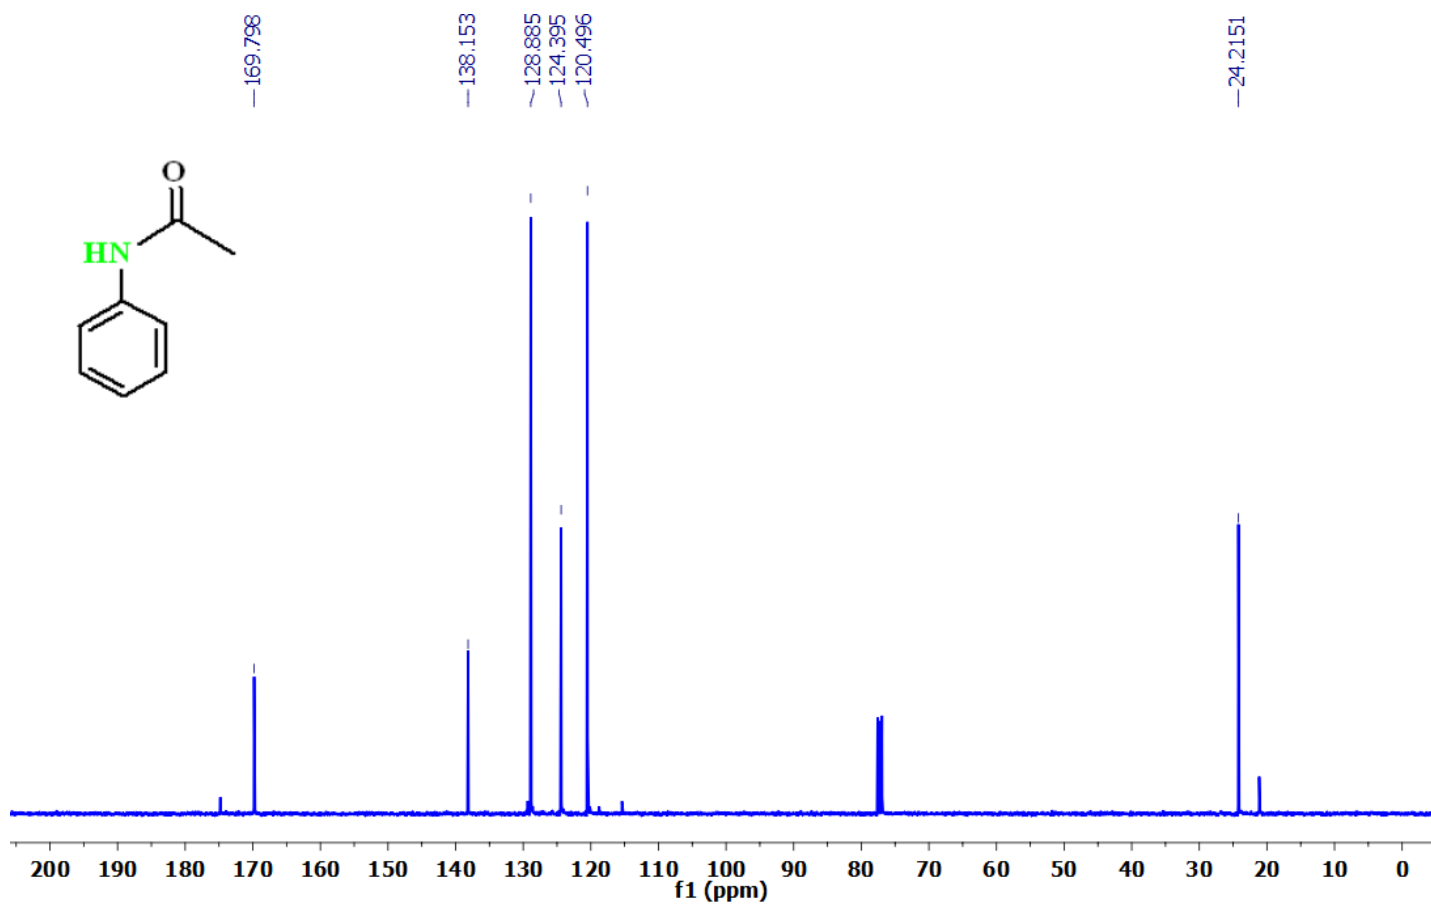

<sup>13</sup>C NMR of *N*-phenylacetamide

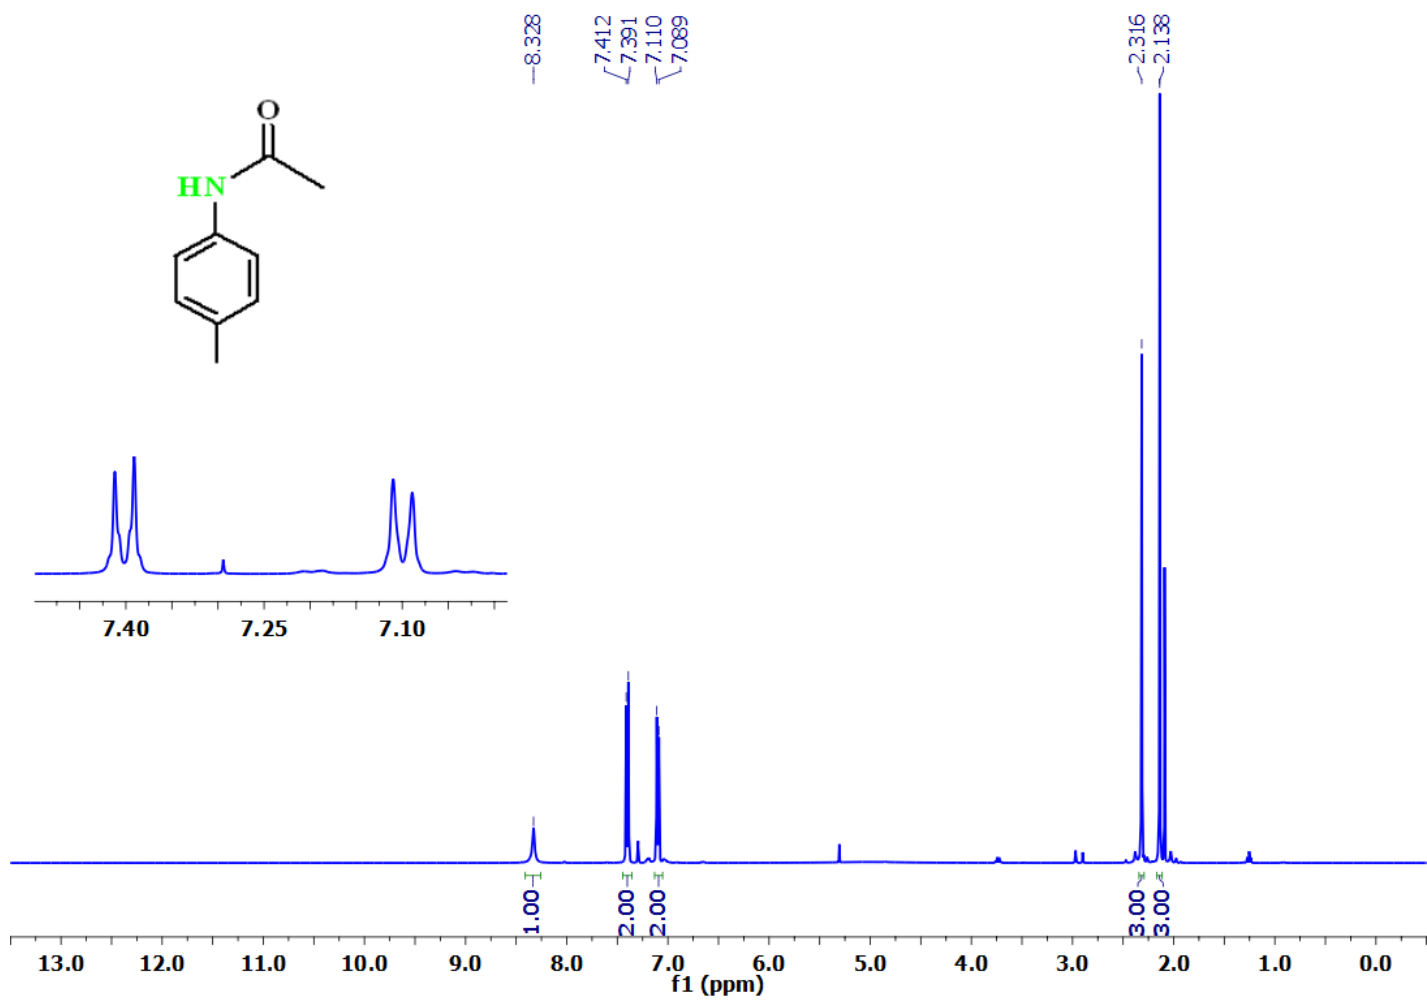

$^1\text{H}$  NMR of *N*-(*p*-tolyl) acetamide

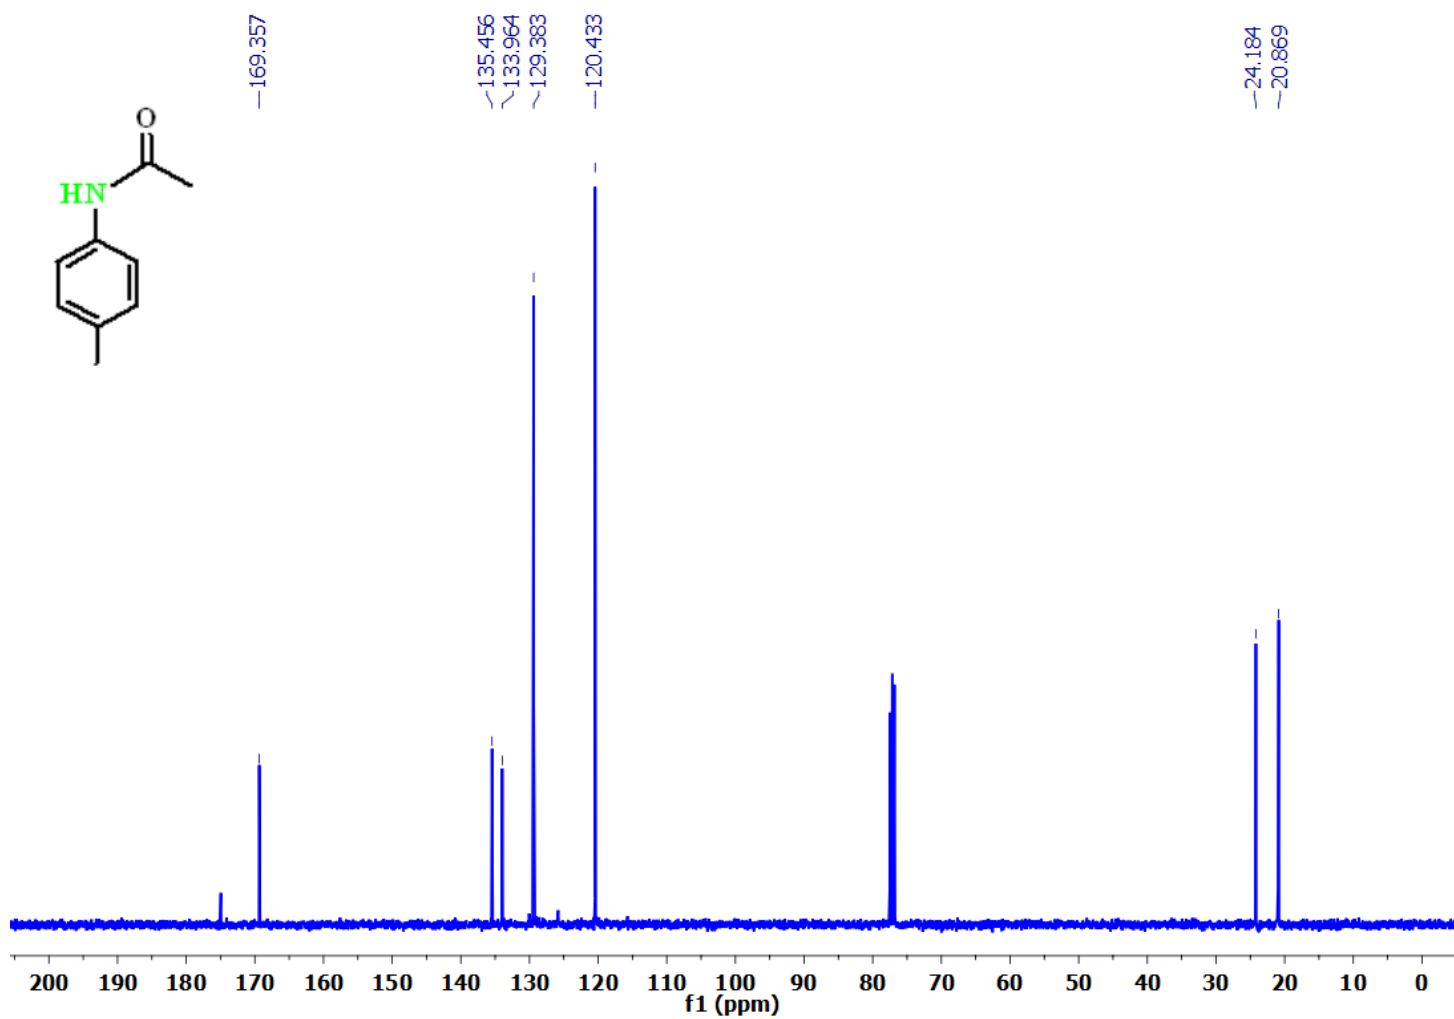

$^{13}\text{C}$  NMR of *N*-(*p*-tolyl) acetamide

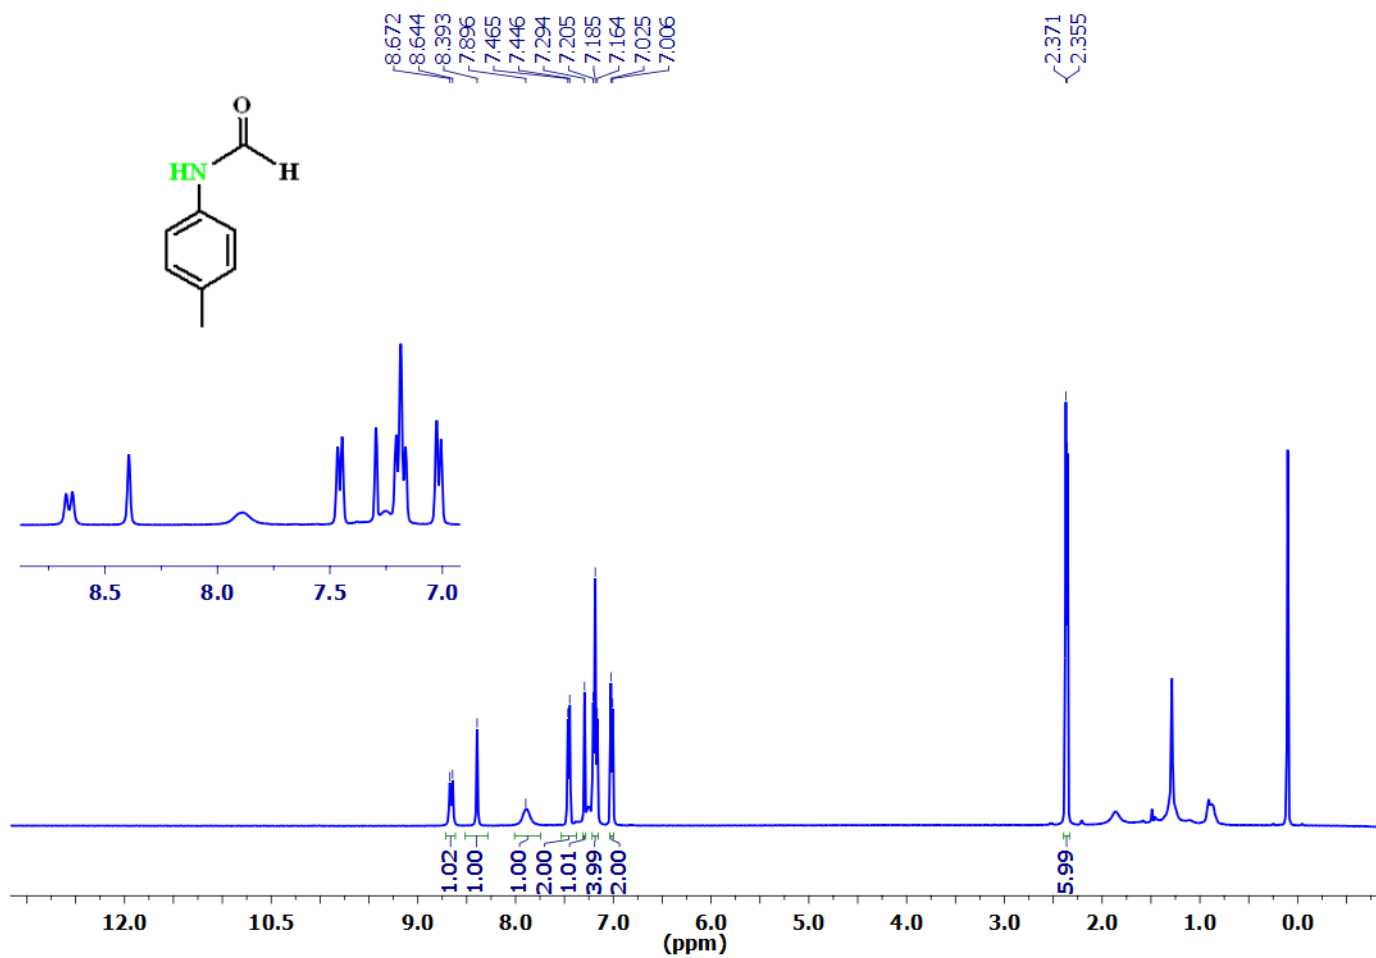

<sup>1</sup>H NMR of *N*-(*p*-tolyl) formamide

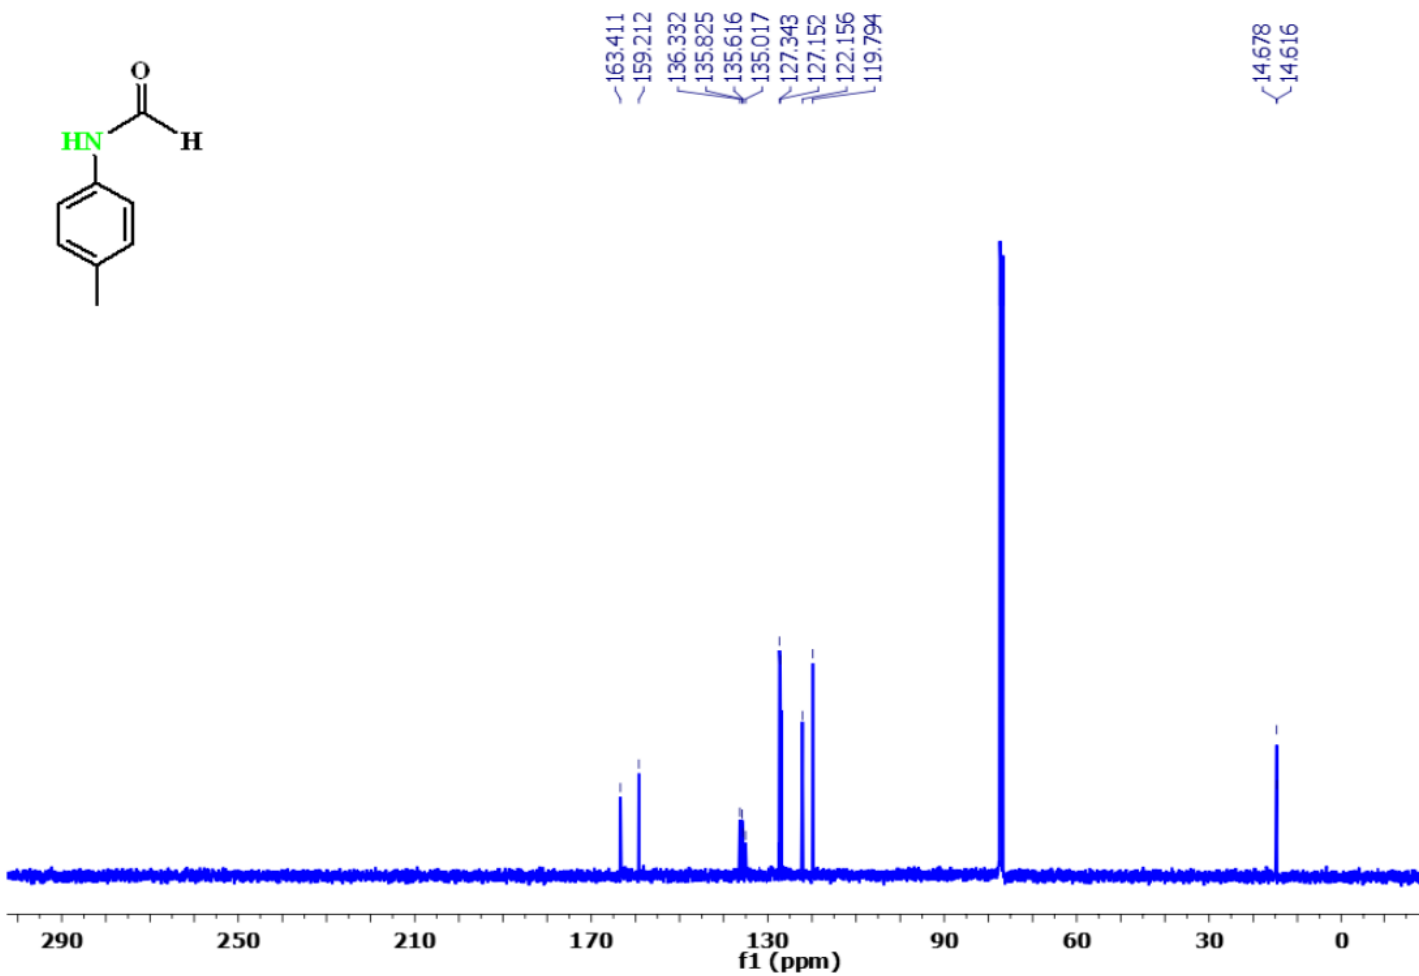

$^{13}\text{C}$  NMR of *N*-(*p*-tolyl) formamide

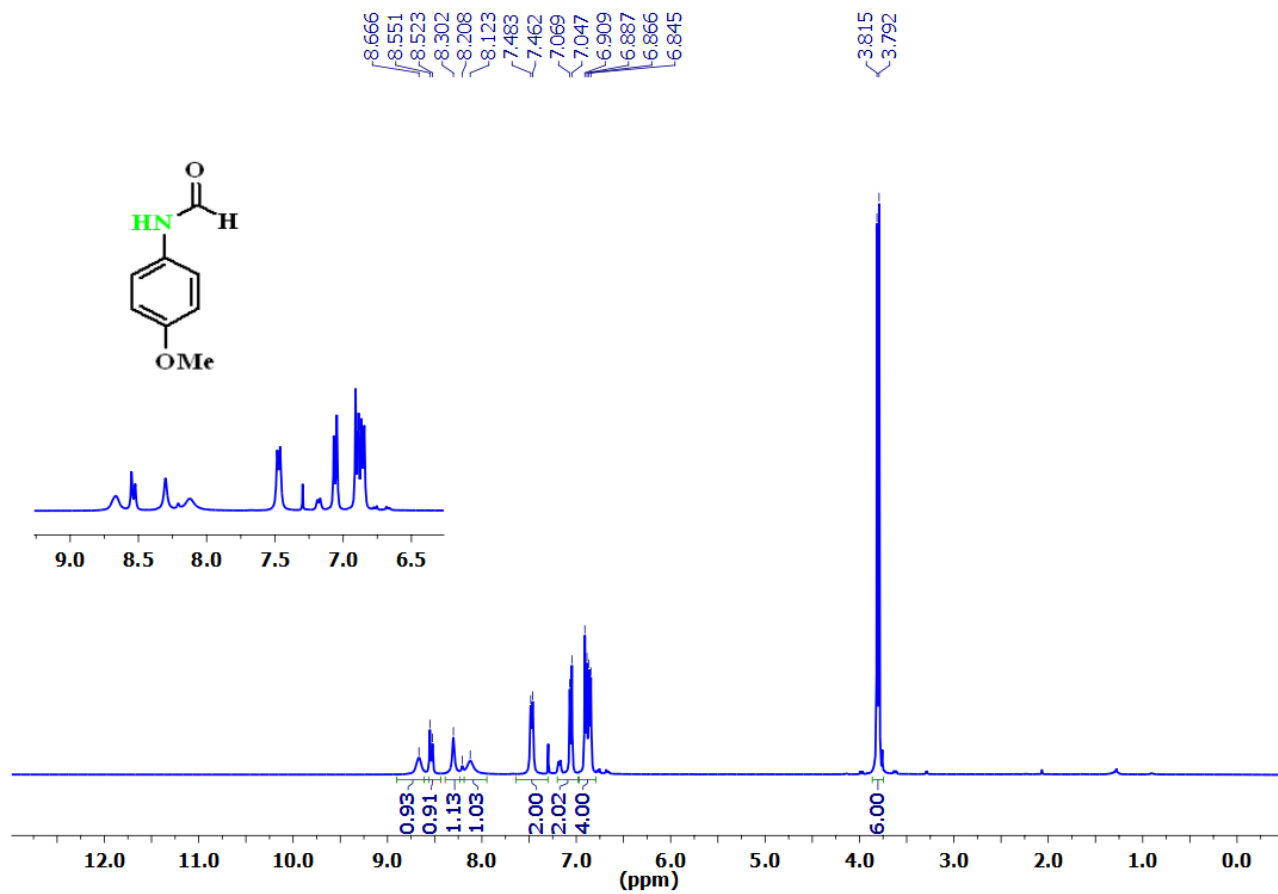

$^1\text{H}$  NMR of *N*-(4-methoxyphenyl) formamide

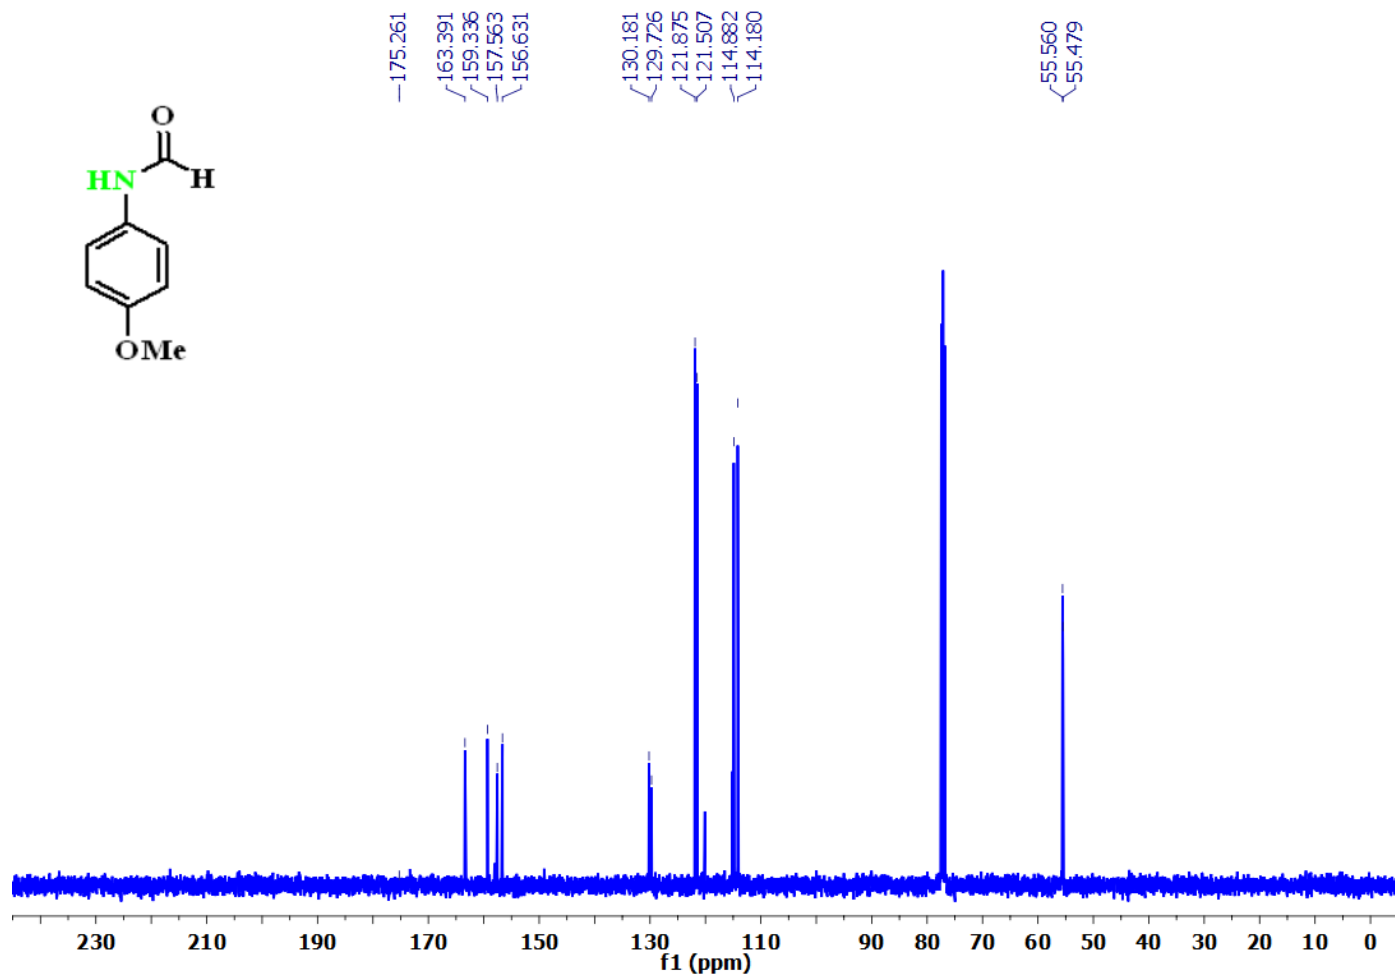

<sup>13</sup>C NMR of *N*-(4-methoxyphenyl) formamide



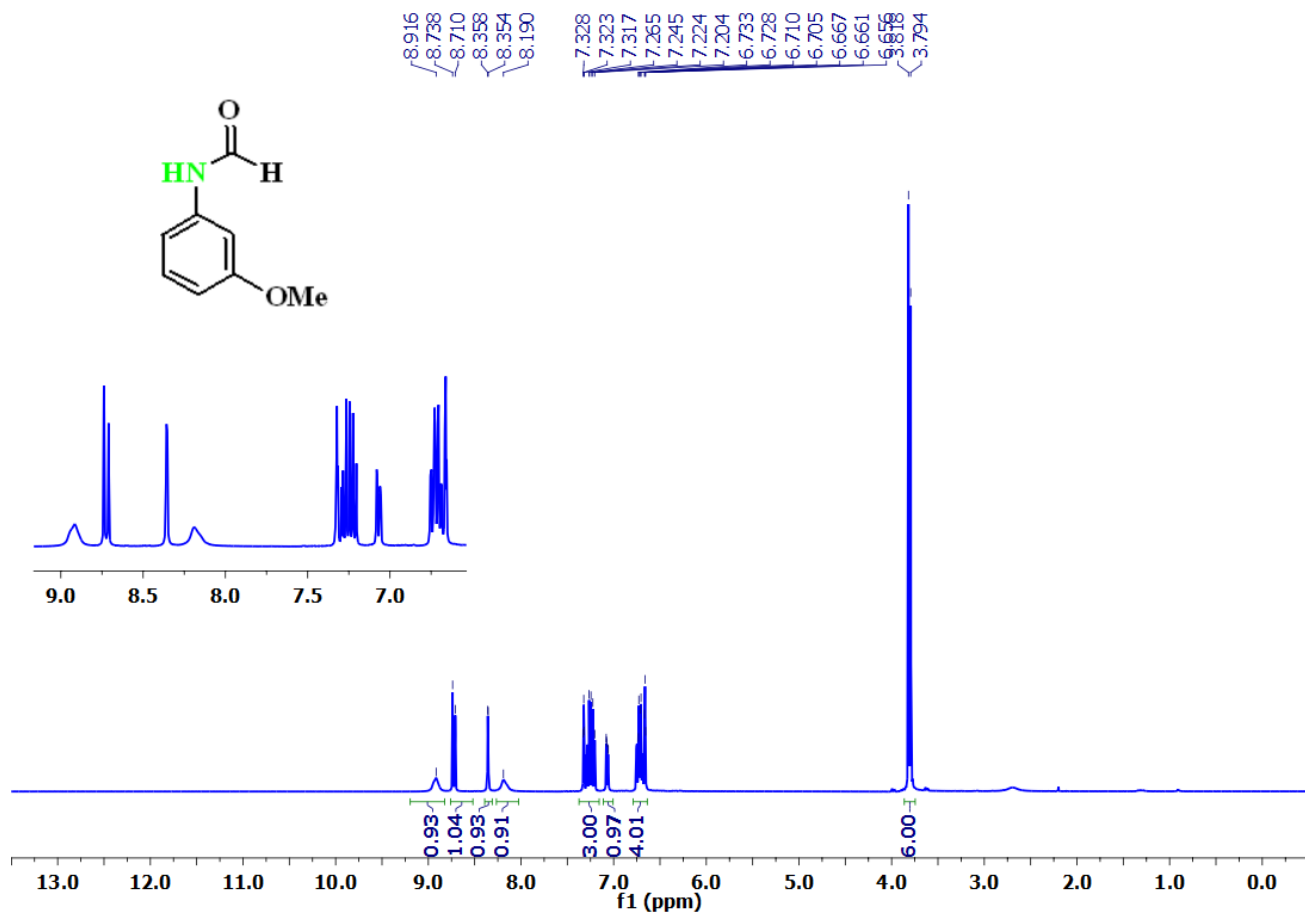

<sup>1</sup>H NMR of *N*-(3-methoxyphenyl) formamide

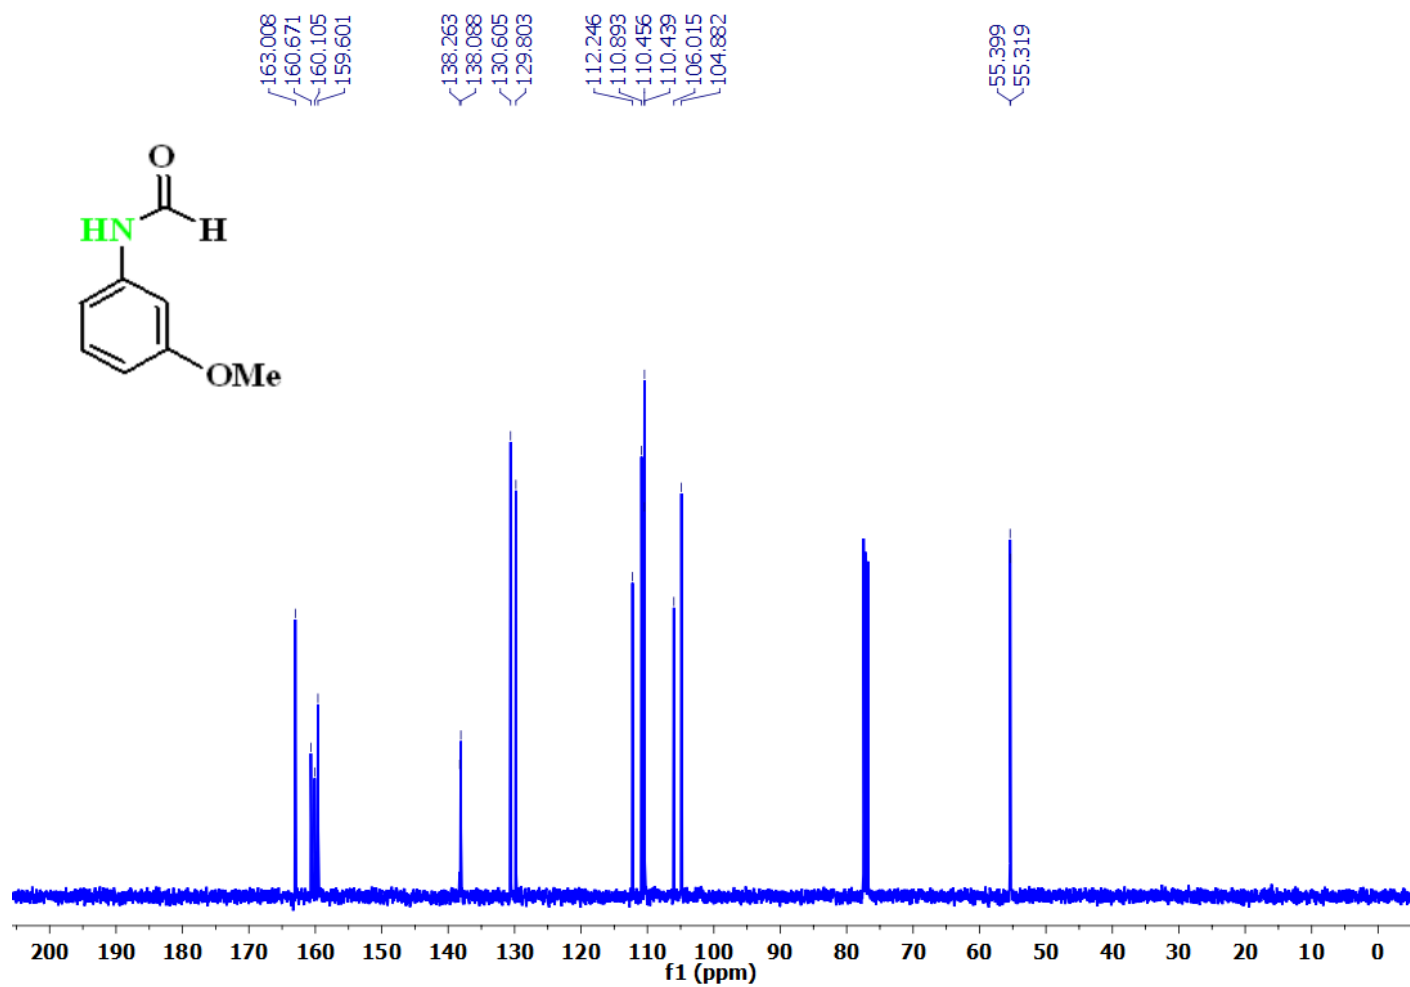

<sup>13</sup>C NMR of *N*-(3-methoxyphenyl) formamide

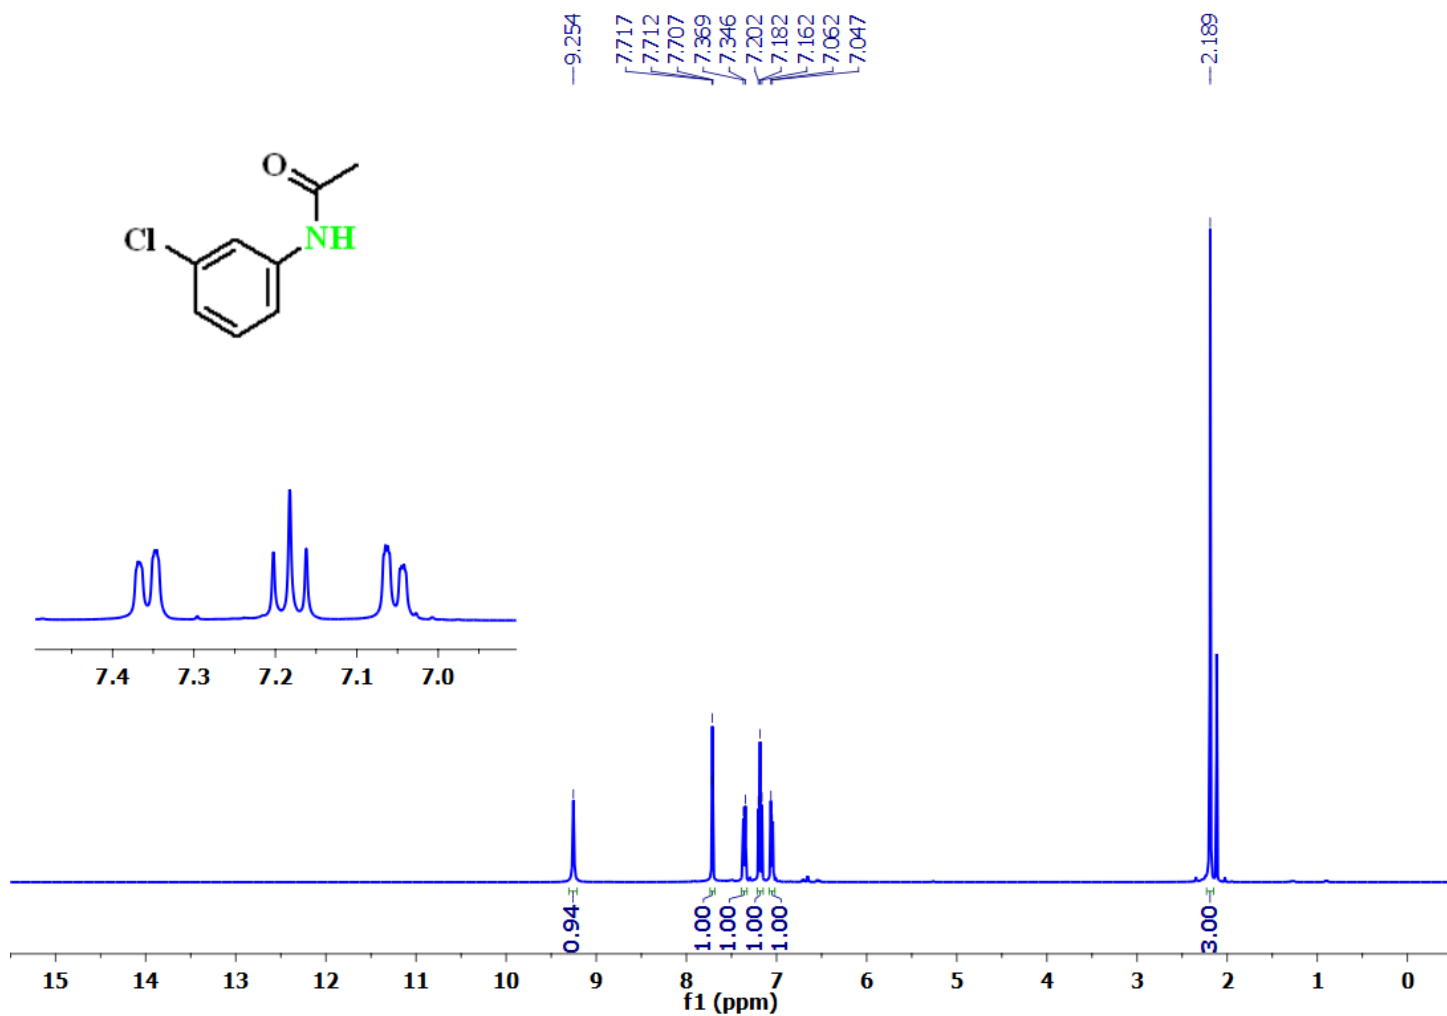

<sup>1</sup>H NMR of *N*-(3-chlorophenyl) acetamide

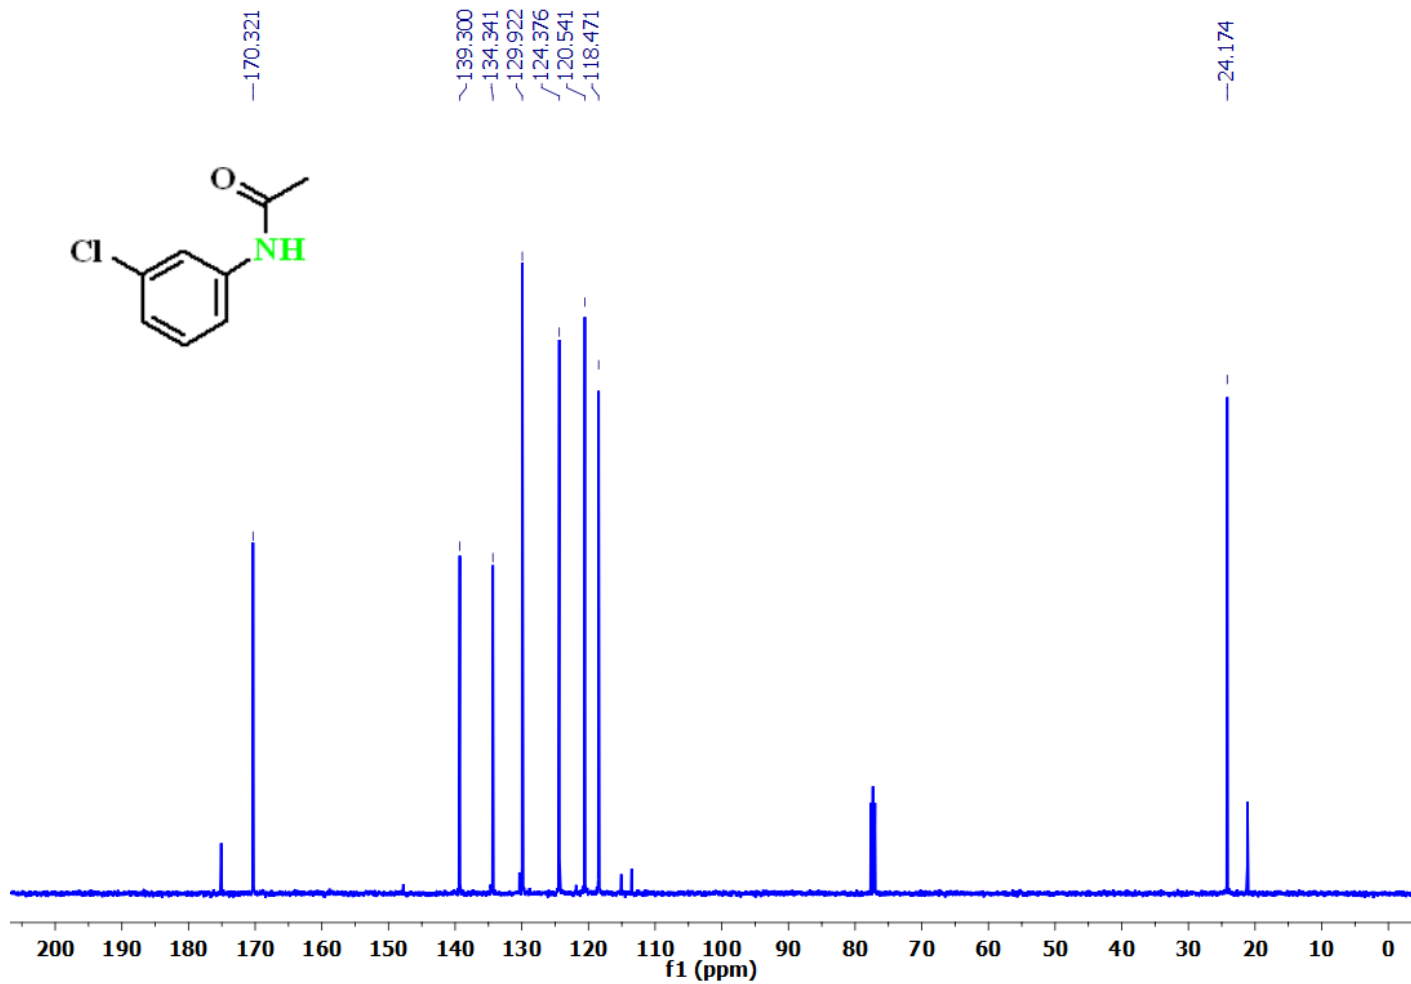

<sup>13</sup>C NMR of *N*-(3-chlorophenyl) acetamide

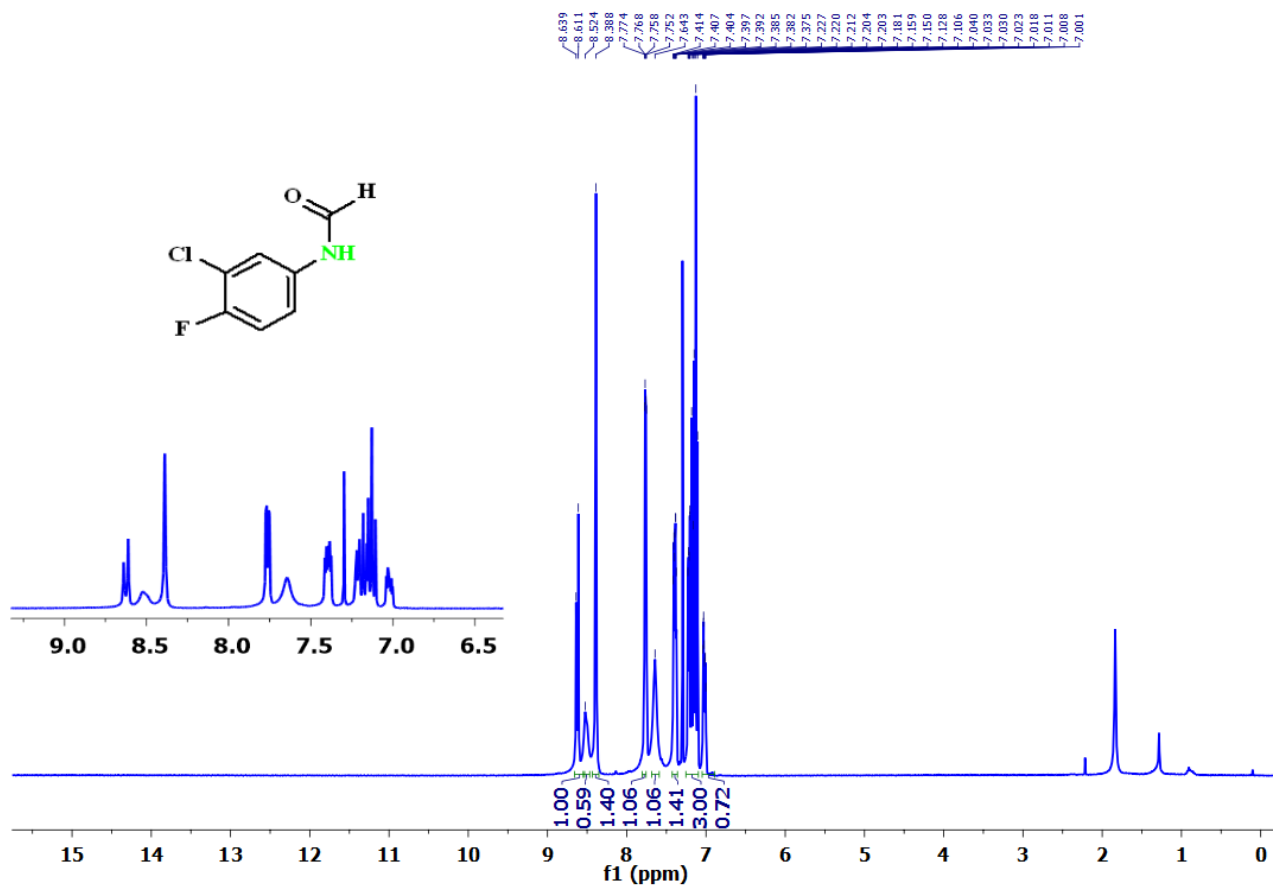

<sup>1</sup>H NMR of *N*-(3-chloro-4-fluorophenyl) formamide

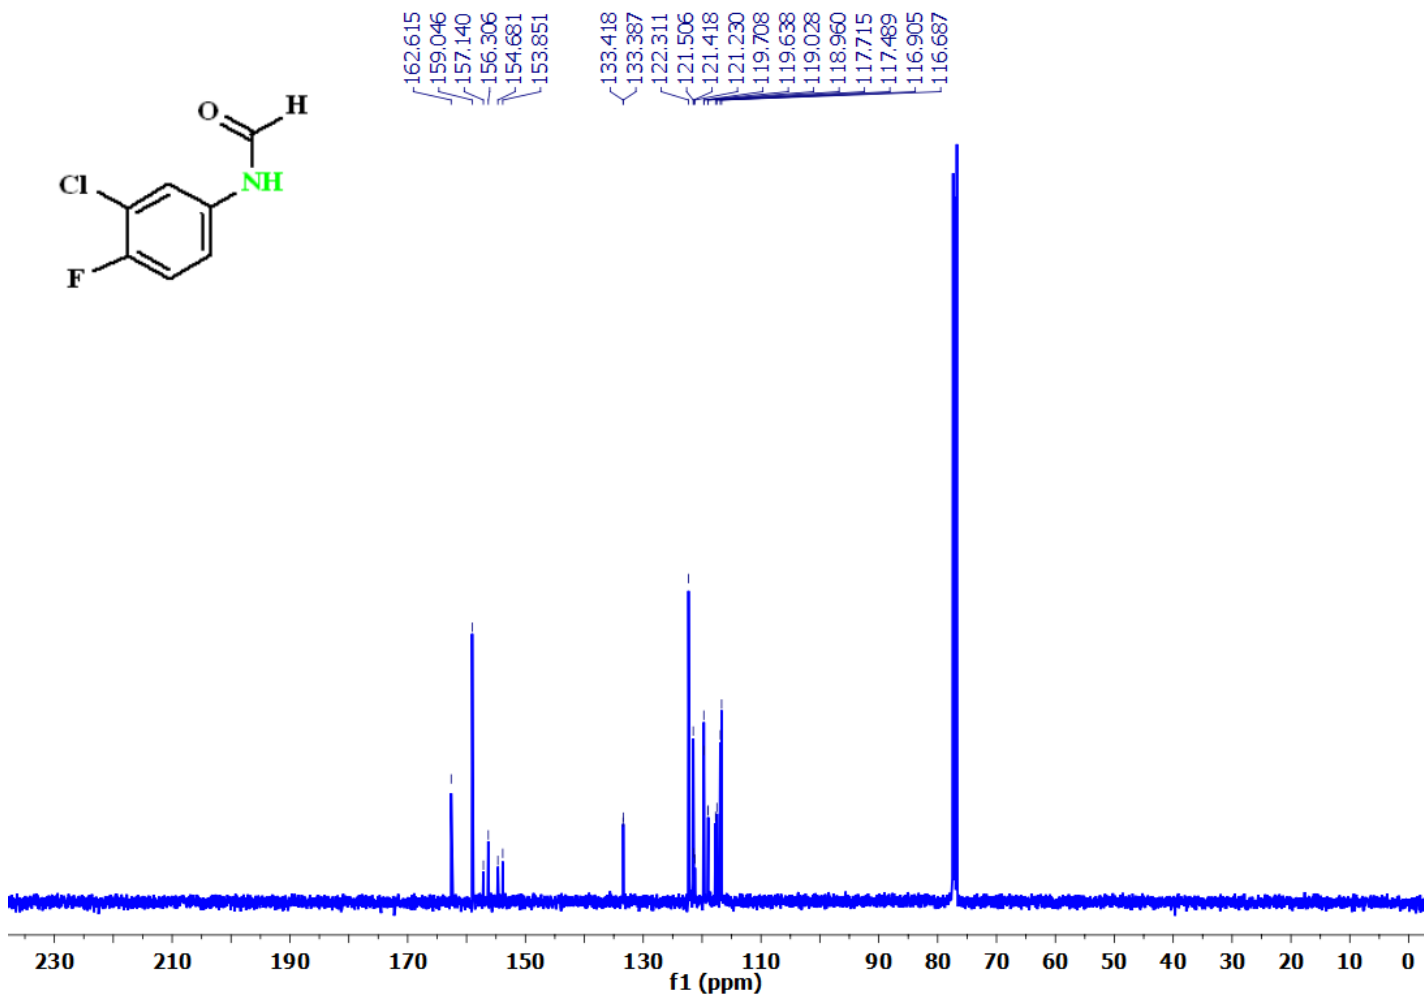

<sup>13</sup>C NMR of *N*-(3-chloro-4-fluorophenyl) formamide

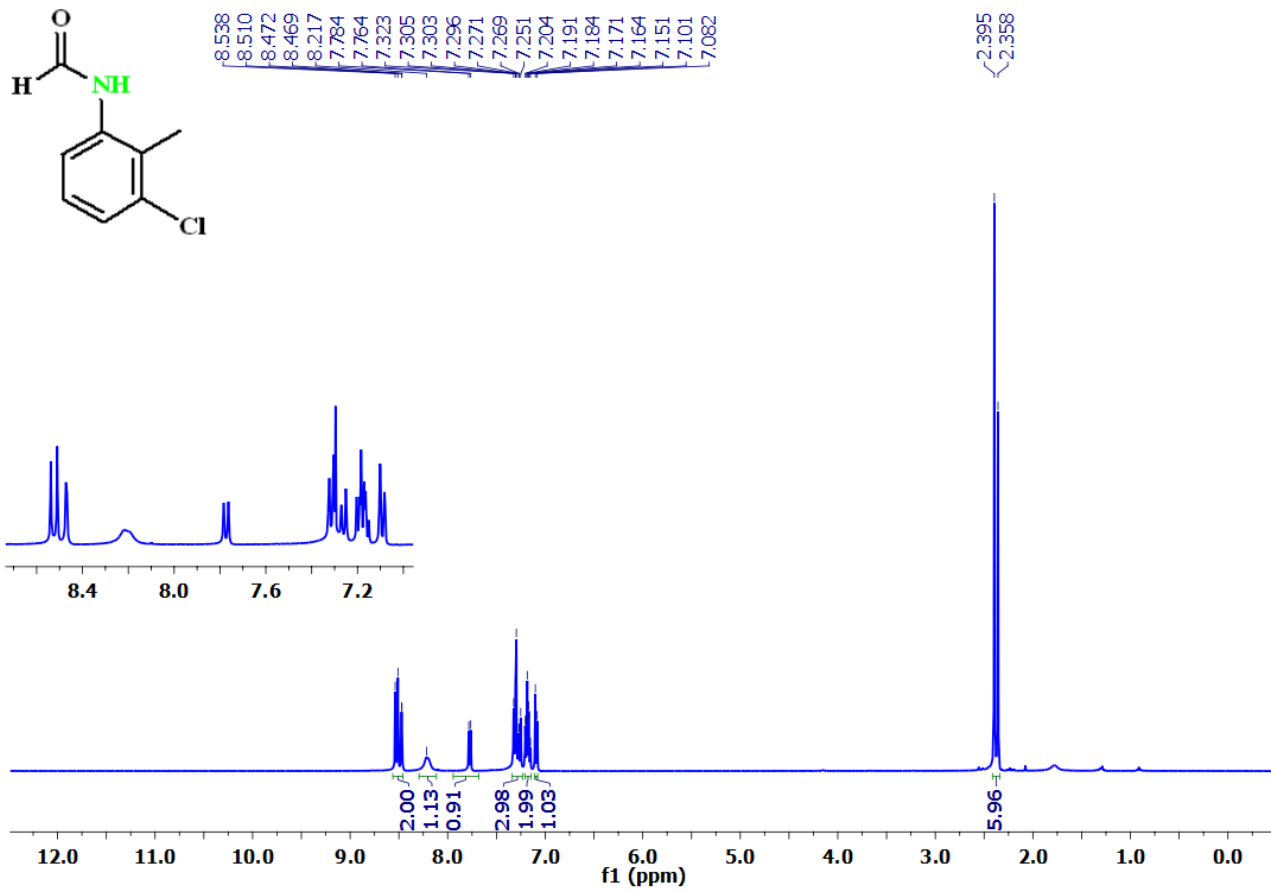

<sup>1</sup>H NMR of *N*-(3-chloro-2-methylphenyl) formamide

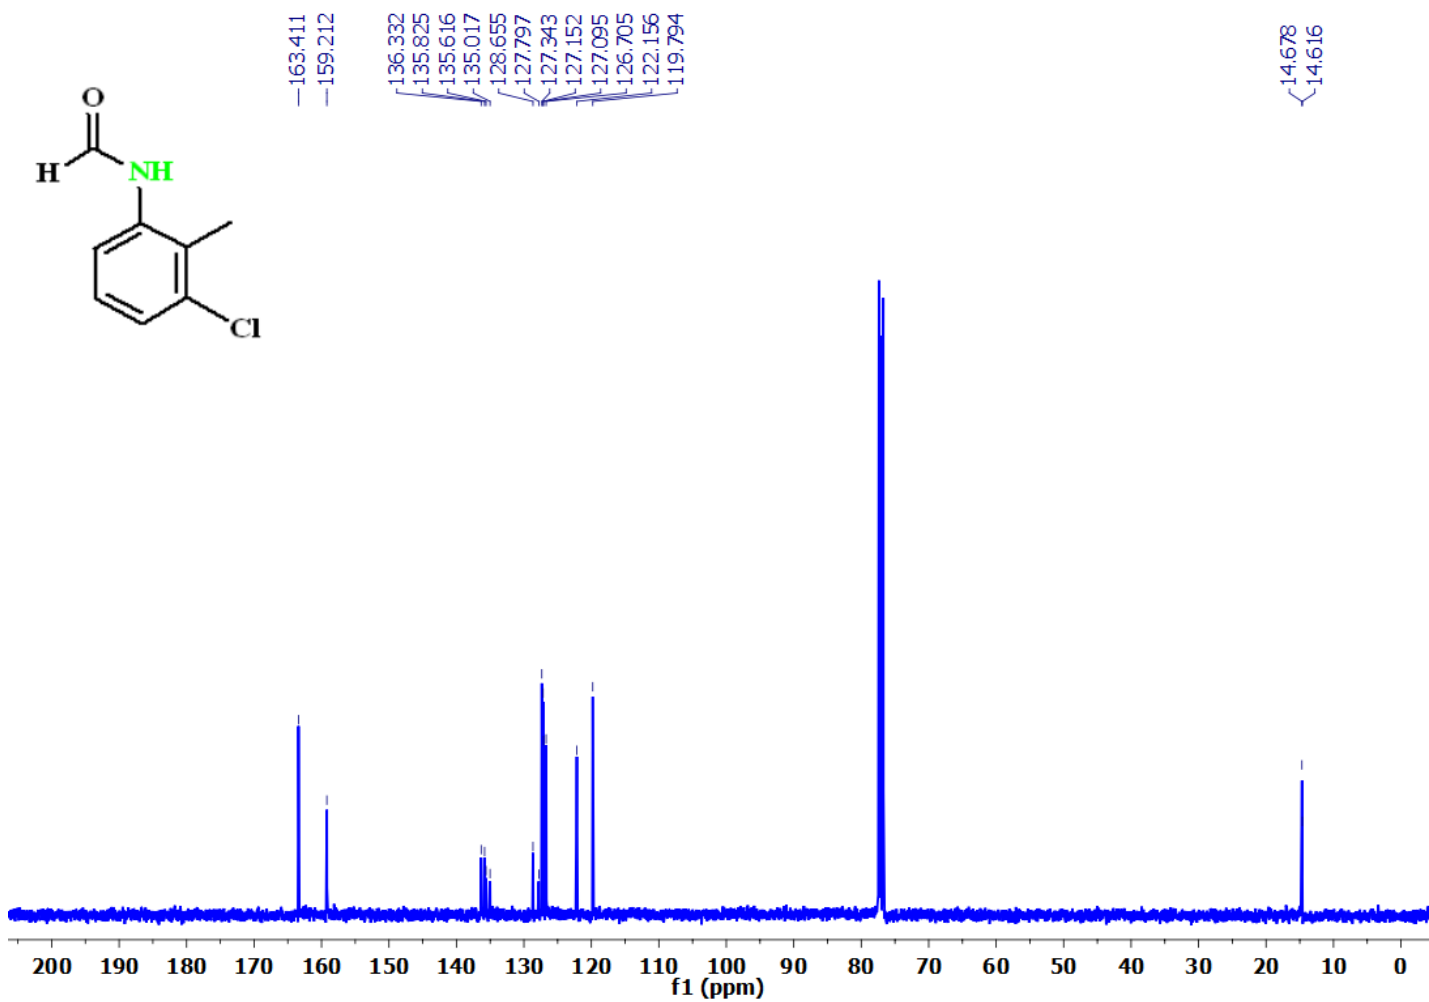

$^{13}\text{C}$  NMR of *N*-(3-chloro-2-methylphenyl) formamide



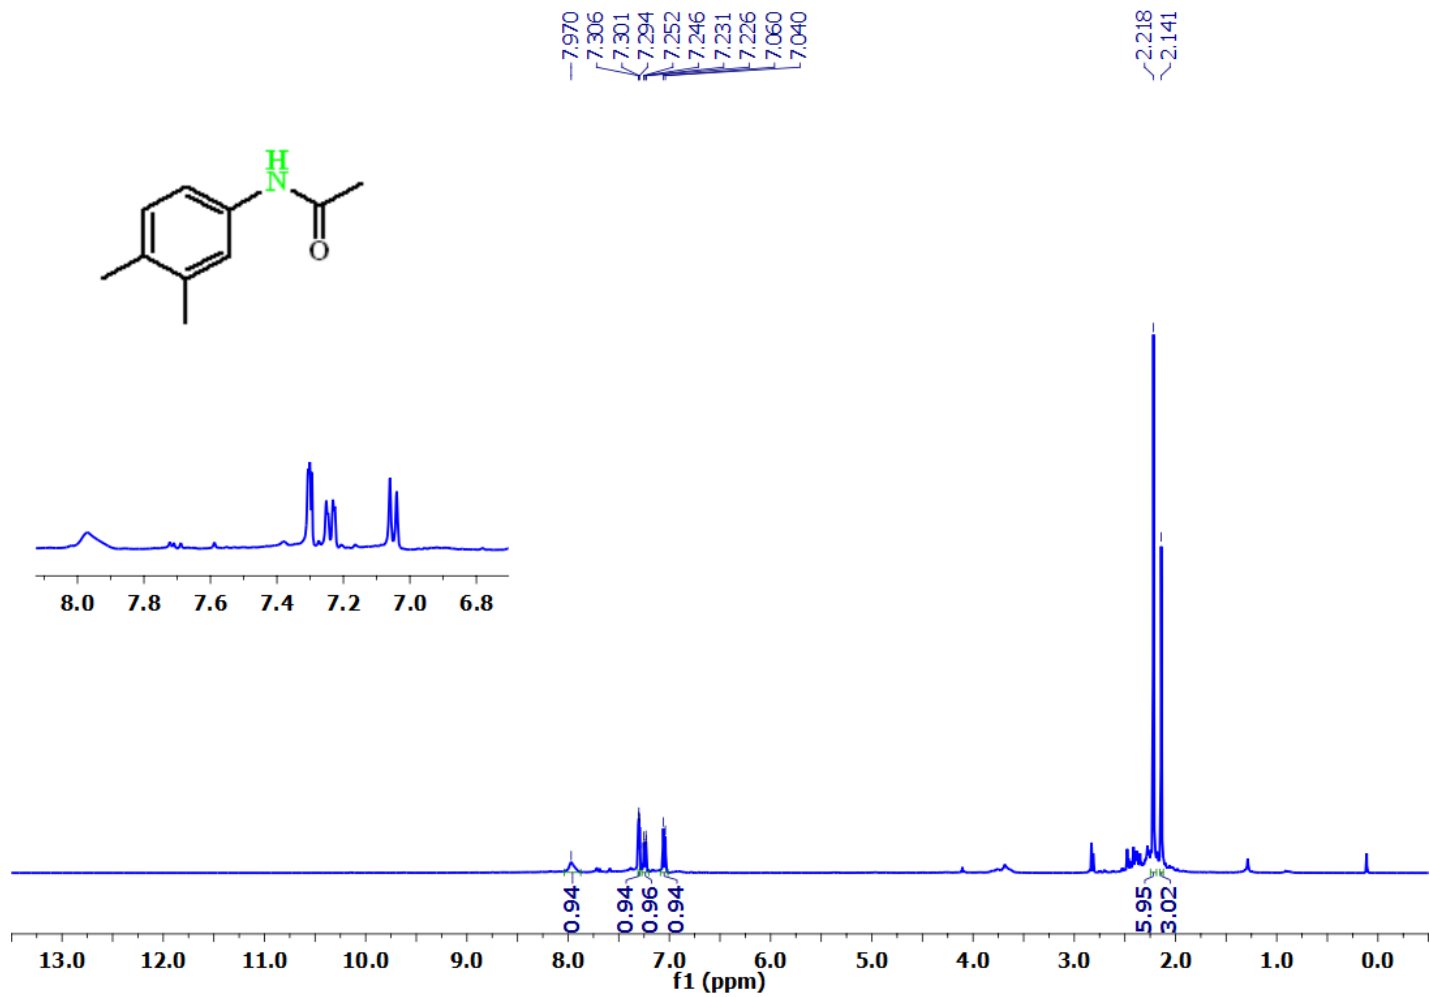

<sup>1</sup>H NMR of *N*-(3,4-dimethylphenyl) acetamide

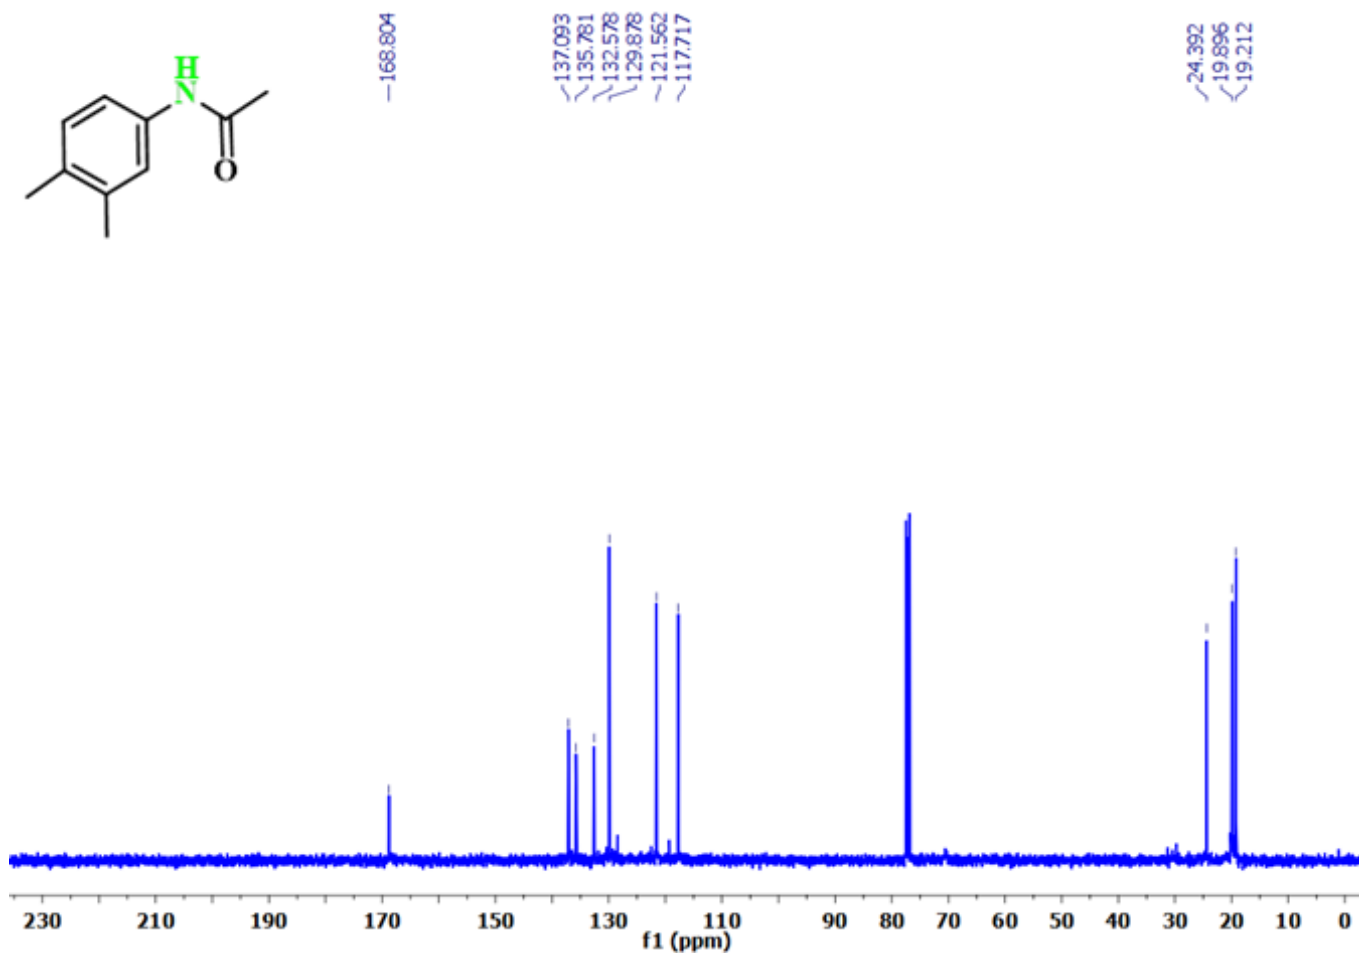

<sup>13</sup>C NMR of *N*-(3,4-dimethylphenyl) acetamide

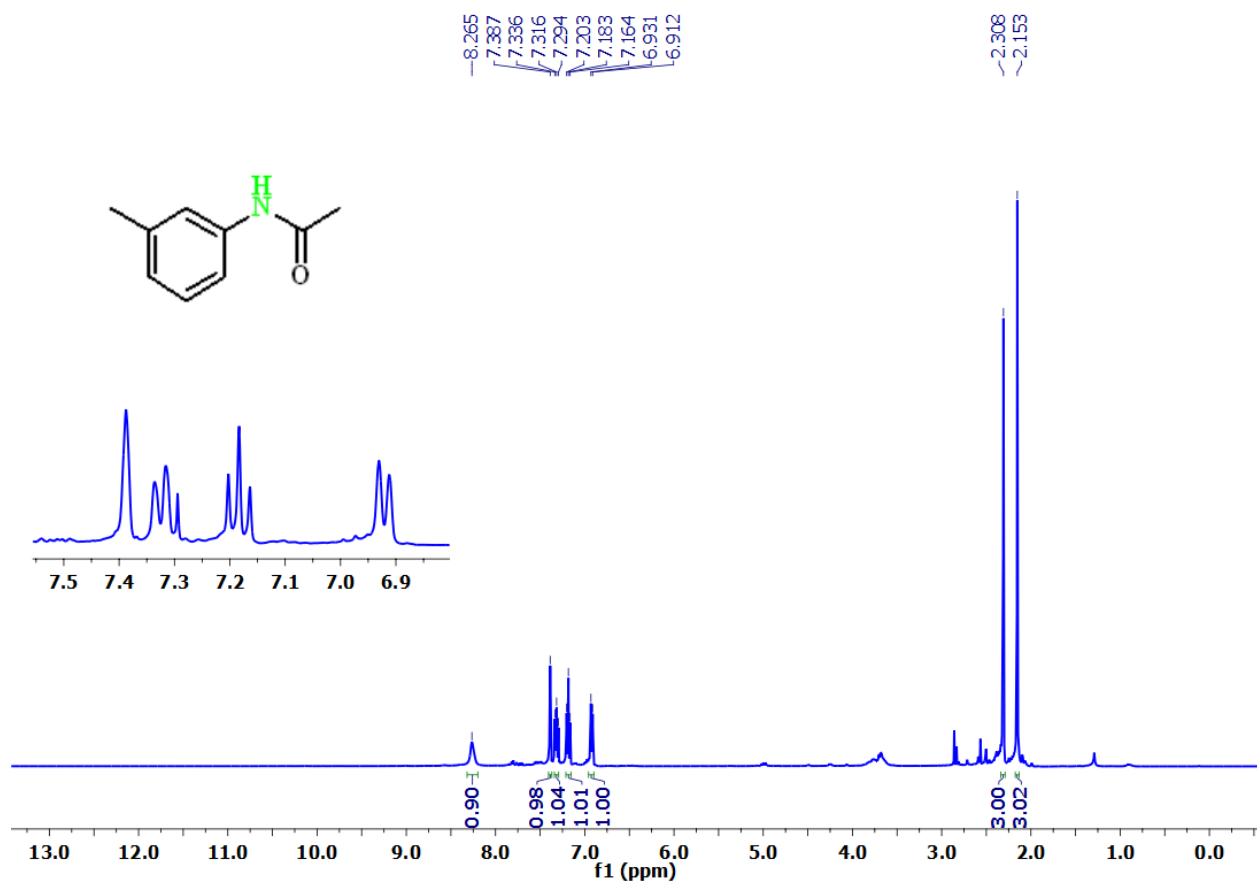

<sup>1</sup>H NMR of *N*-(3-Methylphenyl) acetamide

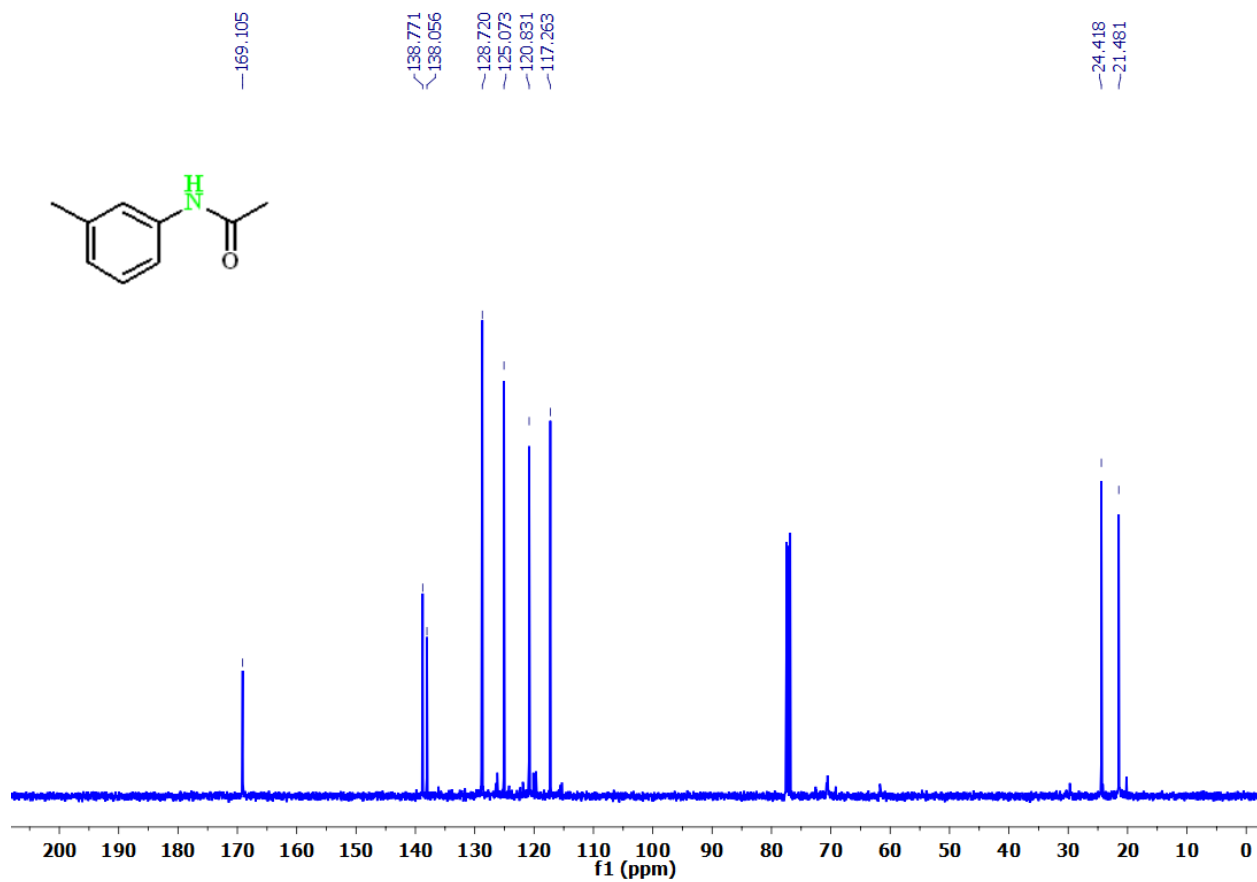

$^{13}\text{C}$  NMR of *N*-(3-Methylphenyl) acetamide

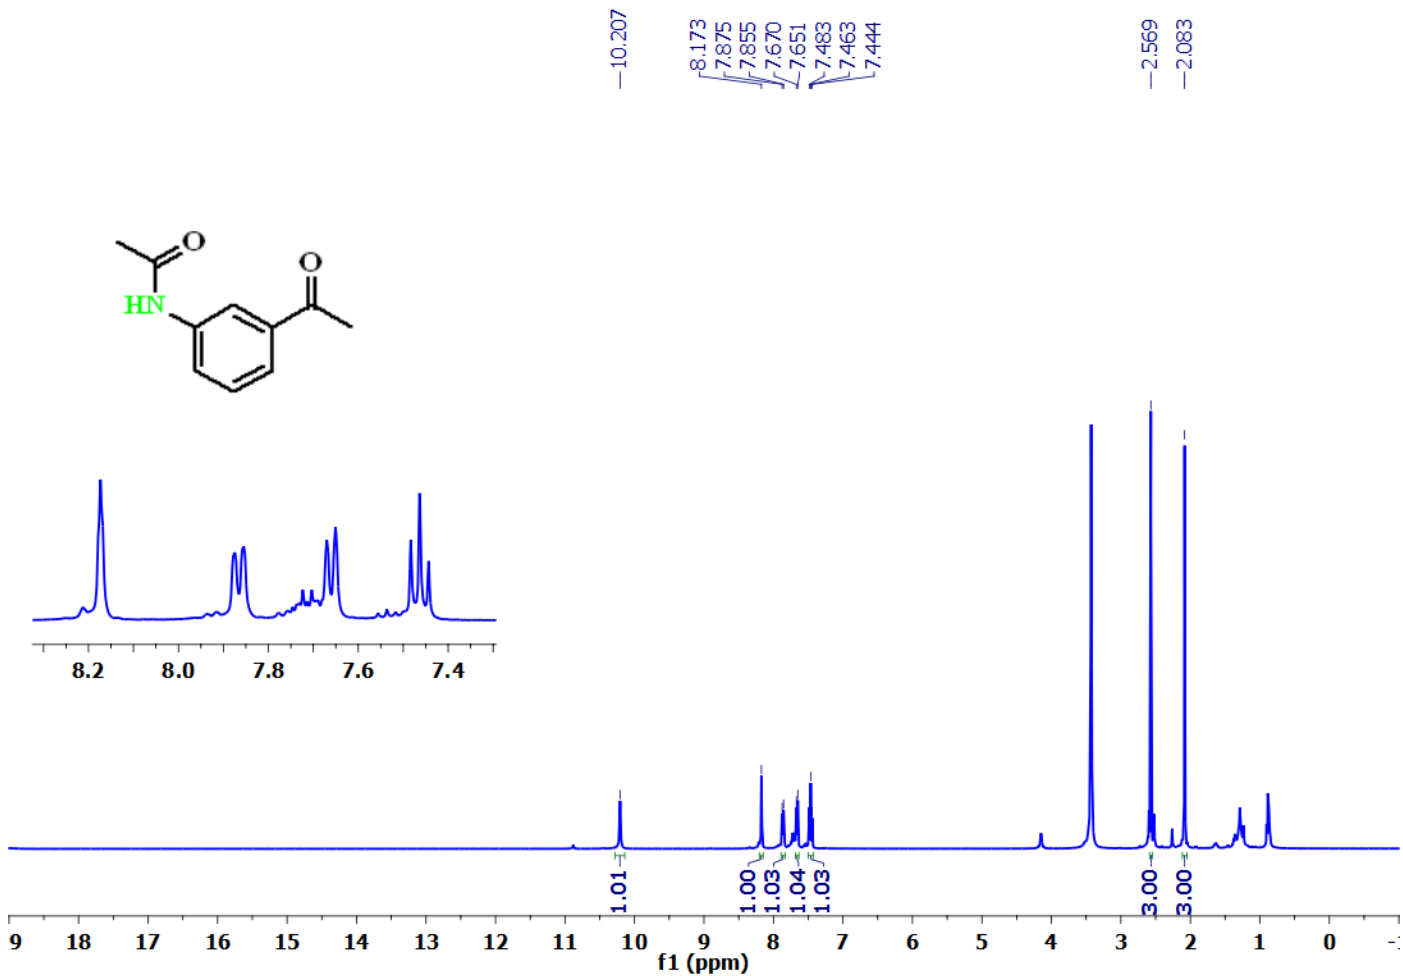

$^1\text{H}$  NMR of *N*-(3-acetylphenyl) acetamide

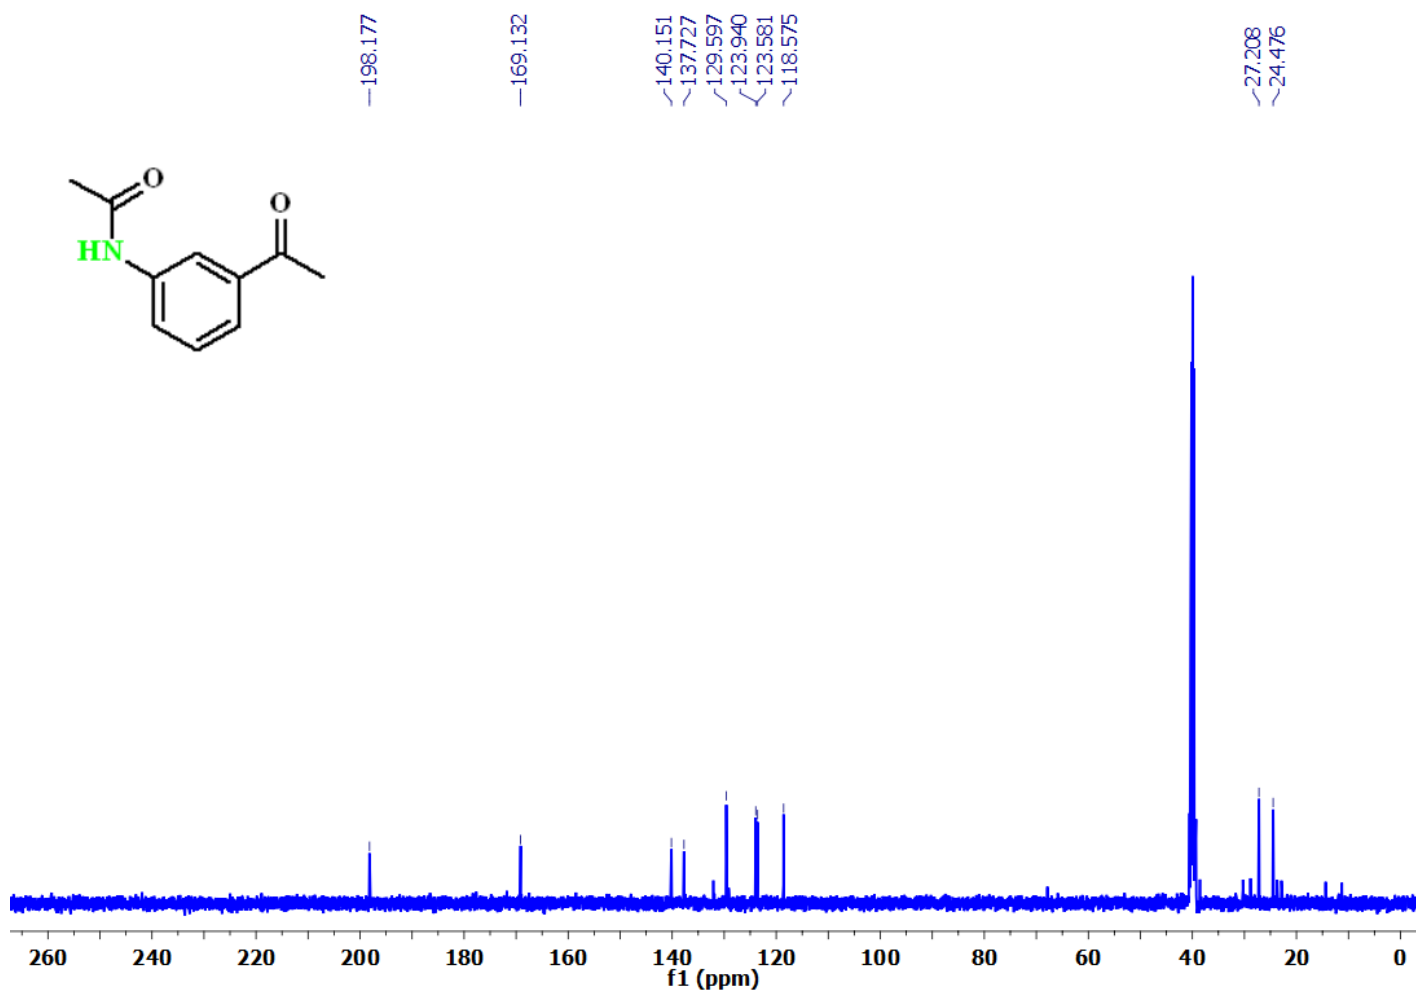

<sup>13</sup>C NMR of *N*-(3-acetylphenyl) acetamide

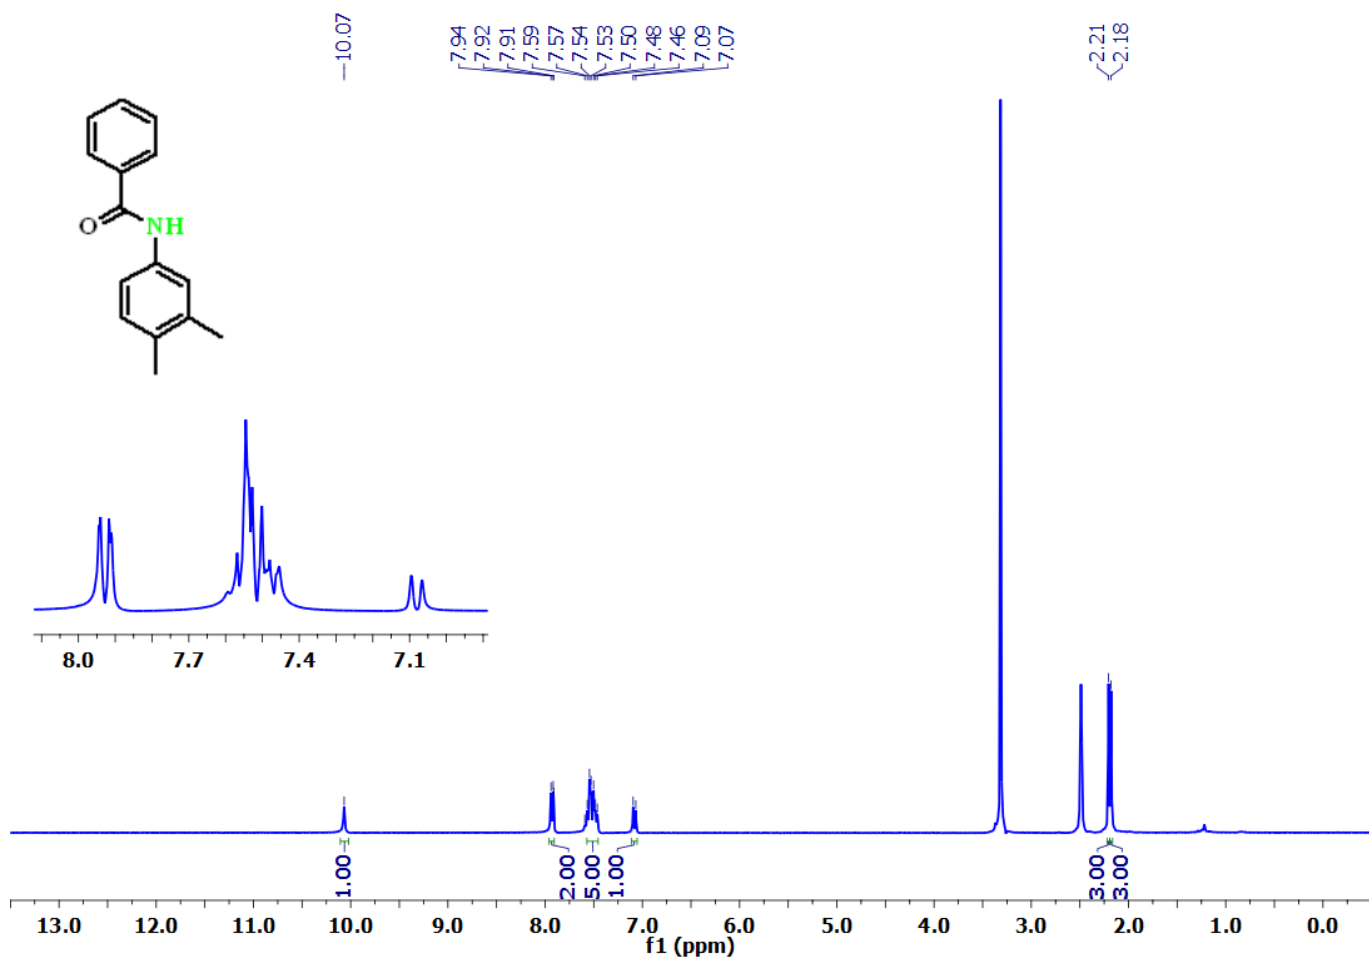

$^1\text{H}$  NMR of *N*-(3,4-dimethylphenyl) benzamide

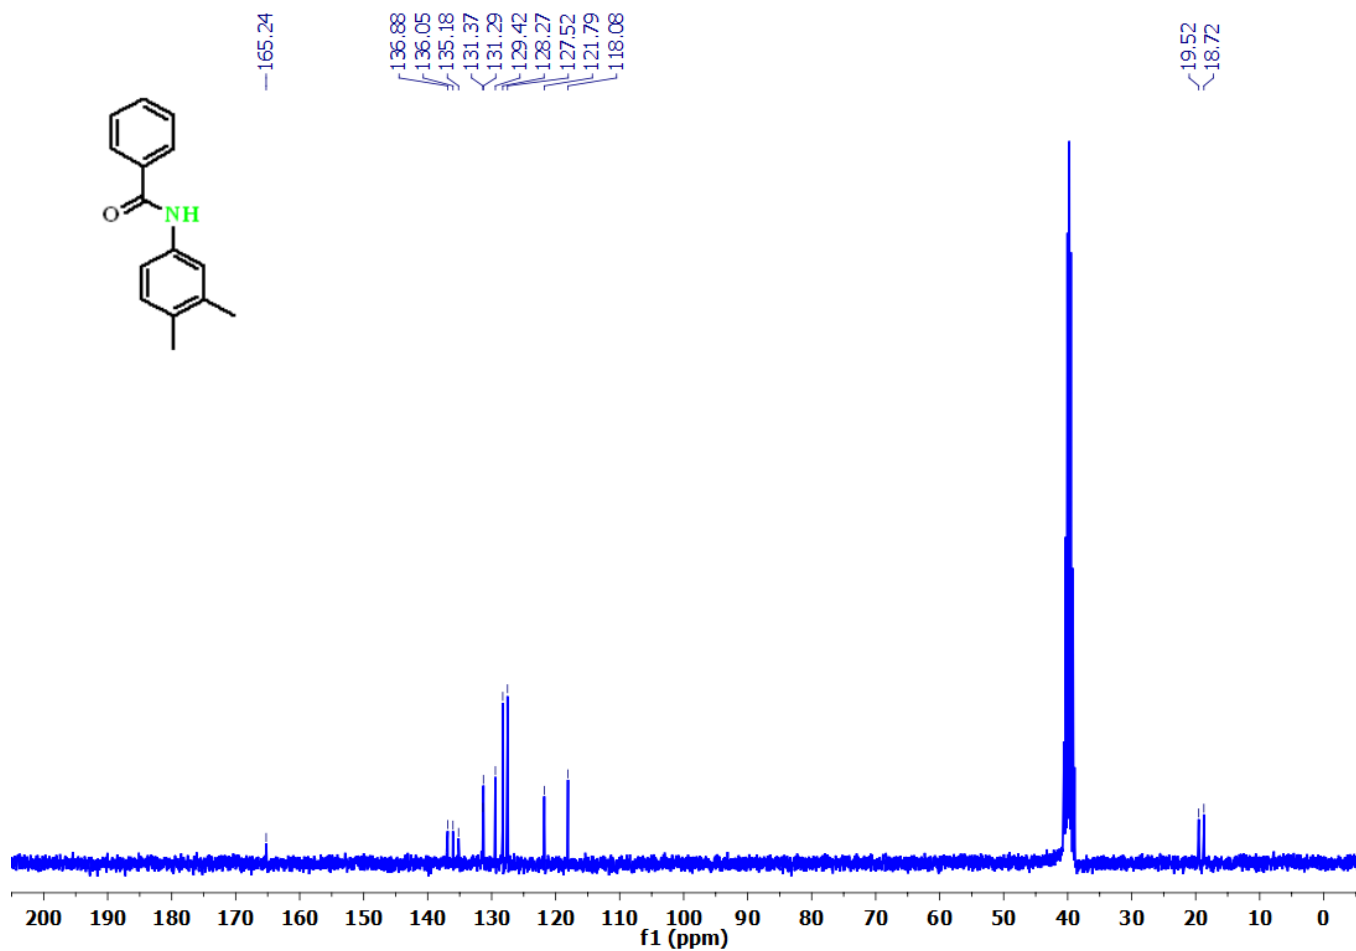

$^{13}\text{C}$  NMR of *N*-(3,4-dimethylphenyl) benzamide



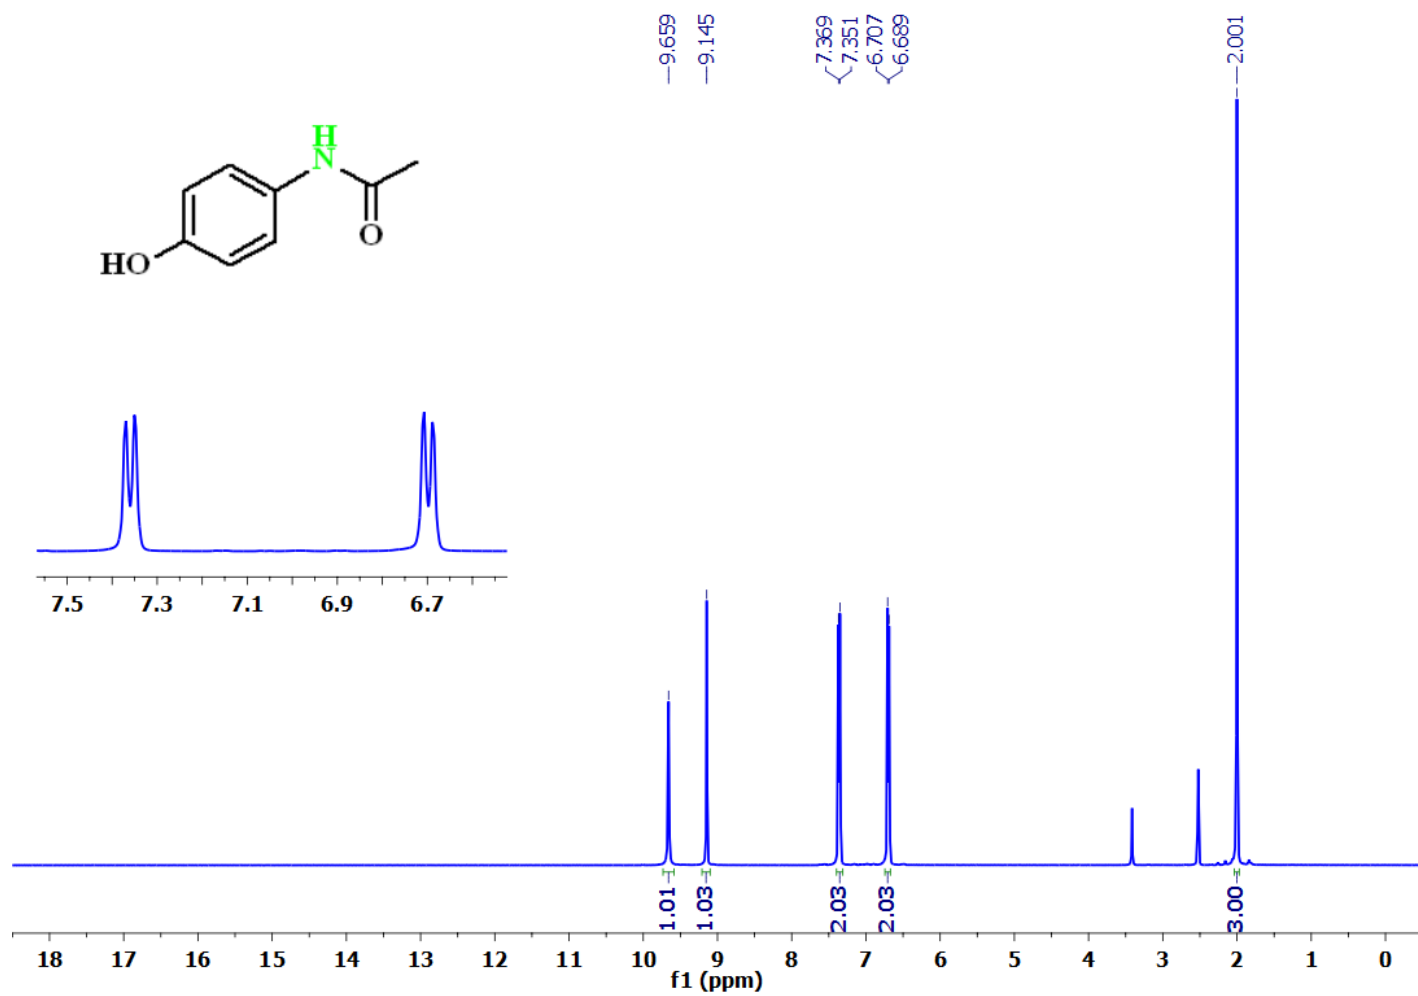

<sup>1</sup>H NMR of *N*-(4-hydroxyphenyl) acetamide

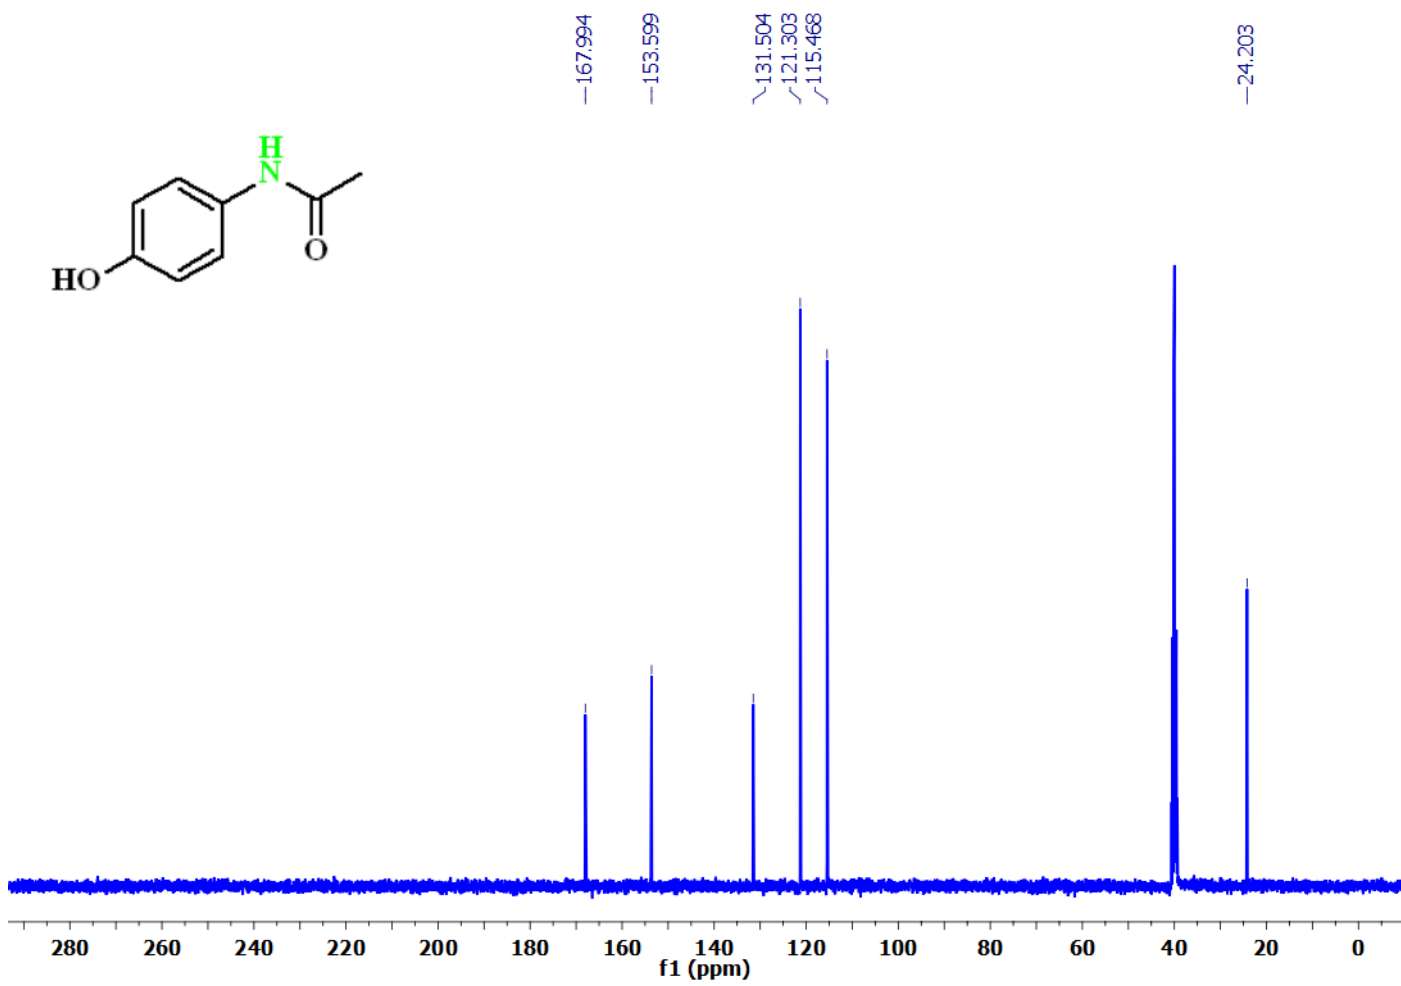

<sup>13</sup>C NMR of *N*-(4-hydroxyphenyl) acetamide
